# Supplementary material for: ProbOnto: ontology and knowledge base of probability distributions
Source: PubMed Central journal article supplement (PMC5013898; doi:10.1093/bioinformatics/btw170), 2016-04-03
Supplement: supp_btw170_Swat_et_al_Supplementary1_ProbOnto_KBprintout.pdf [file supp_btw170_Swat_et_al_Supplementary1_ProbOnto_KBprintout.pdf]

SUPPLEMENTARY MATERIALS PART 1/2

---

M.J. Swat et al.

*ProbOnto – Ontology and Knowledge Base of Probability Distributions*

**ProbOnto Knowledge Base**

---

VERSION 1.0 (MARCH 2016)

FOR UPDATES VISIT [HTTP://PROBONTO.ORG](http://probonto.org)

# Contents

|                                                                 |            |
|-----------------------------------------------------------------|------------|
| <b>List of Figures</b>                                          | <b>1</b>   |
| <b>1 Knowledge base overview</b>                                | <b>4</b>   |
| 1.1 Symbols . . . . .                                           | 4          |
| 5    1.2 Distributions – properties and relationships . . . . . | 6          |
| <b>References</b>                                               | <b>118</b> |

# List of Figures

|    |                                                                                           |    |
|----|-------------------------------------------------------------------------------------------|----|
|    | 1.1 Bernoulli1 distribution plotted using the provided R code. . . . .                    | 6  |
|    | 1.2 Beta1 distribution plotted using the provided R code. . . . .                         | 7  |
| 10 | 1.3 BetaBinomial1 distribution plotted using the provided R code. . . . .                 | 9  |
|    | 1.4 Binomial1 distribution plotted using the provided R code. . . . .                     | 10 |
|    | 1.5 BirnbaumSaunders1 distribution plotted using the provided R code. . . . .             | 12 |
|    | 1.6 CategoricalNonordered1 distribution plotted using the provided R code. . . . .        | 13 |
|    | 1.7 CategoricalOrdered1 distribution plotted using the provided R code. . . . .           | 14 |
| 15 | 1.8 Cauchy1 distribution plotted using the provided R code. . . . .                       | 15 |
|    | 1.9 ChiSquared1 distribution plotted using the provided R code. . . . .                   | 16 |
|    | 1.10 ConwayMaxwellPoisson1 distribution plotted using the provided R code. . . . .        | 18 |
|    | 1.11 DoublePoisson1 distribution plotted using the provided R code. . . . .               | 20 |
|    | 1.12 Erlang1 distribution plotted using the provided R code. . . . .                      | 22 |
| 20 | 1.13 Exponential1 distribution plotted using the provided R code. . . . .                 | 23 |
|    | 1.14 Exponential2 distribution plotted using the provided R code. . . . .                 | 25 |
|    | 1.15 F1 distribution plotted using the provided R code. . . . .                           | 26 |
|    | 1.16 Gamma1 distribution plotted using the provided R code. . . . .                       | 28 |
|    | 1.17 Gamma2 distribution plotted using the provided R code. . . . .                       | 29 |
| 25 | 1.18 GeneralizedGamma1 distribution plotted using the provided R code. . . . .            | 31 |
|    | 1.19 GeneralizedGamma2 distribution plotted using the provided R code. . . . .            | 32 |
|    | 1.20 GeneralizedGamma3 distribution plotted using the provided R code. . . . .            | 34 |
|    | 1.21 GeneralizedNegativeBinomial1 distribution plotted using the provided R code. . . . . | 35 |
|    | 1.22 GeneralizedPoisson1 distribution plotted using the provided R code. . . . .          | 37 |
| 30 | 1.23 GeneralizedPoisson3 distribution plotted using the provided R code. . . . .          | 38 |
|    | 1.24 GeneralizedPoisson2 distribution plotted using the provided R code. . . . .          | 39 |
|    | 1.25 Geometric1 distribution plotted using the provided R code. . . . .                   | 40 |
|    | 1.26 Gompertz1 distribution plotted using the provided R code. . . . .                    | 42 |
|    | 1.27 Gumbell1 distribution plotted using the provided R code. . . . .                     | 43 |
| 35 | 1.28 HalfNormal1 distribution plotted using the provided R code. . . . .                  | 44 |
|    | 1.29 Hypergeometric1 distribution plotted using the provided R code. . . . .              | 45 |
|    | 1.30 InverseBinomial1 distribution plotted using the provided R code. . . . .             | 47 |
|    | 1.31 InverseGamma1 distribution plotted using the provided R code. . . . .                | 48 |
|    | 1.32 InverseGaussian1 distribution plotted using the provided R code. . . . .             | 49 |
| 40 | 1.33 Laplace1 distribution plotted using the provided R code. . . . .                     | 51 |
|    | 1.34 Laplace2 distribution plotted using the provided R code. . . . .                     | 52 |
|    | 1.35 LogLogistic1 distribution plotted using the provided R code. . . . .                 | 54 |
|    | 1.36 LogLogistic2 distribution plotted using the provided R code. . . . .                 | 55 |
|    | 1.37 LogNormal1 distribution plotted using the provided R code. . . . .                   | 57 |
| 45 | 1.38 LogNormal2 distribution plotted using the provided R code. . . . .                   | 59 |
|    | 1.39 LogNormal3 distribution plotted using the provided R code. . . . .                   | 60 |
|    | 1.40 LogNormal4 distribution plotted using the provided R code. . . . .                   | 62 |
|    | 1.41 LogNormal5 distribution plotted using the provided R code. . . . .                   | 64 |
|    | 1.42 LogNormal6 distribution plotted using the provided R code. . . . .                   | 66 |
| 50 | 1.43 LogUniform1 distribution plotted using the provided R code. . . . .                  | 68 |
|    | 1.44 Logistic1 distribution plotted using the provided R code. . . . .                    | 69 |
|    | 1.45 Logistic2 distribution plotted using the provided R code. . . . .                    | 70 |
|    | 1.46 Example 1: PMF and CDF of the Mixture Poisson distribution . . . . .                 | 72 |
|    | 1.47 Example 2: PDF and CDF of the Mixture Normal distribution . . . . .                  | 72 |
| 55 | 1.48 Nakagami1 distribution plotted using the provided R code. . . . .                    | 77 |
|    | 1.49 NegativeBinomial1 distribution plotted using the provided R code. . . . .            | 78 |

---

|    |                                                                                              |     |
|----|----------------------------------------------------------------------------------------------|-----|
|    | 1.50 NegativeBinomial2 distribution plotted using the provided R code. . . . .               | 80  |
|    | 1.51 NegativeBinomial3 distribution plotted using the provided R code. . . . .               | 82  |
|    | 1.52 NegativeBinomial4 distribution plotted using the provided R code. . . . .               | 83  |
| 60 | 1.53 NegativeBinomial5 distribution plotted using the provided R code. . . . .               | 85  |
|    | 1.54 Normal1 distribution plotted using the provided R code. . . . .                         | 87  |
|    | 1.55 Normal2 distribution plotted using the provided R code. . . . .                         | 89  |
|    | 1.56 Normal3 distribution plotted using the provided R code. . . . .                         | 91  |
|    | 1.57 NormalInverseGamma1 distribution plotted using the provided R code. . . . .             | 92  |
| 65 | 1.58 Pareto1 distribution plotted using the provided R code. . . . .                         | 93  |
|    | 1.59 Poisson1 distribution plotted using the provided R code. . . . .                        | 95  |
|    | 1.60 Rayleigh1 distribution plotted using the provided R code. . . . .                       | 97  |
|    | 1.61 StandardNormal1 distribution plotted using the provided R code. . . . .                 | 98  |
|    | 1.62 StandardUniform1 distribution plotted using the provided R code. . . . .                | 100 |
| 70 | 1.63 StudentT1 distribution plotted using the provided R code. . . . .                       | 101 |
|    | 1.64 StudentT2 distribution plotted using the provided R code. . . . .                       | 103 |
|    | 1.65 Triangular1 distribution plotted using the provided R code. . . . .                     | 104 |
|    | 1.66 TruncatedNormal1 distribution plotted using the provided R code. . . . .                | 105 |
|    | 1.67 Uniform1 distribution plotted using the provided R code. . . . .                        | 107 |
| 75 | 1.68 UniformDiscrete1 distribution plotted using the provided R code. . . . .                | 108 |
|    | 1.69 UniformDiscrete2 distribution plotted using the provided R code. . . . .                | 109 |
|    | 1.70 Weibull1 distribution plotted using the provided R code. . . . .                        | 111 |
|    | 1.71 Weibull2 distribution plotted using the provided R code. . . . .                        | 112 |
|    | 1.72 ZeroInflatedGeneralizedPoisson1 distribution plotted using the provided R code. . . . . | 115 |
| 80 | 1.73 ZeroInflatedNegativeBinomial1 distribution plotted using the provided R code. . . . .   | 116 |
|    | 1.74 ZeroInflatedPoisson1 distribution plotted using the provided R code. . . . .            | 117 |

# Chapter 1

## Knowledge base overview

This document provides detailed summary of the most important features for supported univariate and multivariate distributions. After the symbol definitions we list for each distribution its

- type
- support definition
- parameters
- defining functions (with R code)
- quantities such as mean, median, mode and variance
- relationships and re-parameterisations
- (for univariate distributions only) PDF/PMF and CDF plots based on the R code stored in the KB.

### 1.1 Symbols

Some of the symbols used in definitions of the functions and quantities listed in the subsequent sections are collected here with references

- Beta function,  $B(x, y)$

$$B(x, y) = \frac{\Gamma(x)\Gamma(y)}{\Gamma(x+y)}$$

[mathworld.wolfram.com/BetaFunction.html](http://mathworld.wolfram.com/BetaFunction.html)  
[en.wikipedia.org/wiki/Beta\\_function](http://en.wikipedia.org/wiki/Beta_function)

- Regularized incomplete Beta function,  $I_p(a, b)$ ,  $I_{1-p}(a, b)$

$$I_x(a, b) = \frac{B(x; a, b)}{B(a, b)}$$

with

$$B(x; a, b) = \int_0^x t^{a-1}(1-t)^{b-1} dt$$

then *incomplete beta function*.

[mathworld.wolfram.com/RegularizedBetaFunction.html](http://mathworld.wolfram.com/RegularizedBetaFunction.html)  
[en.wikipedia.org/wiki/Beta\\_function#Incomplete\\_beta\\_function](http://en.wikipedia.org/wiki/Beta_function#Incomplete_beta_function)

- Error function,  $erf$

$$\operatorname{erf}(z) = \frac{2}{\pi} \int_0^z e^{-t^2} dt$$

[mathworld.wolfram.com/Erf.html](http://mathworld.wolfram.com/Erf.html)  
[en.wikipedia.org/wiki/Error\\_function](http://en.wikipedia.org/wiki/Error_function)

- Euler constant,  $\gamma_E$

$$\gamma_E = \lim_{n \rightarrow \infty} \left( -\log(n) \sum_{k=1}^n \frac{1}{k} \right) = \int_1^{\infty} \left( \frac{1}{[x]} - \frac{1}{x} \right) dx$$

[mathworld.wolfram.com/Euler-MascheroniConstant.html](http://mathworld.wolfram.com/Euler-MascheroniConstant.html)  
[en.wikipedia.org/wiki/Euler%E2%80%93Mascheroni\\_constant](https://en.wikipedia.org/wiki/Euler%E2%80%93Mascheroni_constant)

- Floor function,  $\lfloor x \rfloor$

$\text{floor}(x) = \lfloor x \rfloor$  is the largest integer not greater than  $x$

105 [mathworld.wolfram.com/FloorFunction.html](http://mathworld.wolfram.com/FloorFunction.html)  
[en.wikipedia.org/wiki/Floor\\_and\\_ceiling\\_functions](https://en.wikipedia.org/wiki/Floor_and_ceiling_functions)

- Gamma function,  $\Gamma$

$\Gamma(n) = (n-1)!$ , for  $n$  – positive integer

[mathworld.wolfram.com/GammaFunction.html](http://mathworld.wolfram.com/GammaFunction.html)  
[en.wikipedia.org/wiki/Gamma\\_function](https://en.wikipedia.org/wiki/Gamma_function)

- Lower incomplete gamma function,  $\gamma(s, x)$

$$\gamma(s, x) = \int_0^x t^{s-1} e^{-t} dt$$

110 [mathworld.wolfram.com/IncompleteGammaFunction.html](http://mathworld.wolfram.com/IncompleteGammaFunction.html)  
[https://en.wikipedia.org/wiki/Incomplete\\_gamma\\_function#Lower\\_incomplete\\_Gamma\\_function](https://en.wikipedia.org/wiki/Incomplete_gamma_function#Lower_incomplete_Gamma_function)  
<https://cran.r-project.org/web/packages/zipfR/zipfR.pdf>

- Multivariate Gamma function,  $\Gamma_p$

$$\Gamma_p(a) = \pi^{p(p-1)/4} \prod_{j=1}^p \Gamma[a + (1-j)/2]$$

[en.wikipedia.org/wiki/Multivariate\\_gamma\\_function](https://en.wikipedia.org/wiki/Multivariate_gamma_function)

- Iverson bracket,  $[x = i]$

$$[P] = \begin{cases} 1 & \text{if } P \text{ is true;} \\ 0 & \text{otherwise.} \end{cases}$$

[mathworld.wolfram.com/IversonBracket.html](http://mathworld.wolfram.com/IversonBracket.html)  
[en.wikipedia.org/wiki/Iverson\\_bracket](https://en.wikipedia.org/wiki/Iverson_bracket)

- Pochhammer symbol,  $(x)_n$

$$(x)_n = x(x-1)(x-2)\cdots(x-n+1).$$

115 <http://mathworld.wolfram.com/PochhammerSymbol.html>  
[https://en.wikipedia.org/wiki/Pochhammer\\_symbol](https://en.wikipedia.org/wiki/Pochhammer_symbol)

- Generalized Hypergeometric function,  ${}_pF_q$

$${}_pF_q(a_1, \dots, a_p; b_1, \dots, b_q; z) = \sum_{n=0}^{\infty} \frac{(a_1)_n \cdots (a_p)_n}{(b_1)_n \cdots (b_q)_n} \frac{z^n}{n!}$$

[en.wikipedia.org/wiki/Generalized\\_hypergeometric\\_function](https://en.wikipedia.org/wiki/Generalized_hypergeometric_function)

- Hypergeometric function,  ${}_2F_1$

$${}_2F_1(a, b; c; z) = \sum_{n=0}^{\infty} \frac{(a)_n (b)_n}{(c)_n} \frac{z^n}{n!}.$$

[mathworld.wolfram.com/HypergeometricFunction.html](http://mathworld.wolfram.com/HypergeometricFunction.html)  
[en.wikipedia.org/wiki/Hypergeometric\\_function](https://en.wikipedia.org/wiki/Hypergeometric_function)

## 1.2 Distributions – properties and relationships

### Bernoulli1

**name** Bernoulli 1 (ID: 0000000)  
**type** discrete  
**variate**  $k$ , scalar  
**support**  $k \in \{0, 1\}$

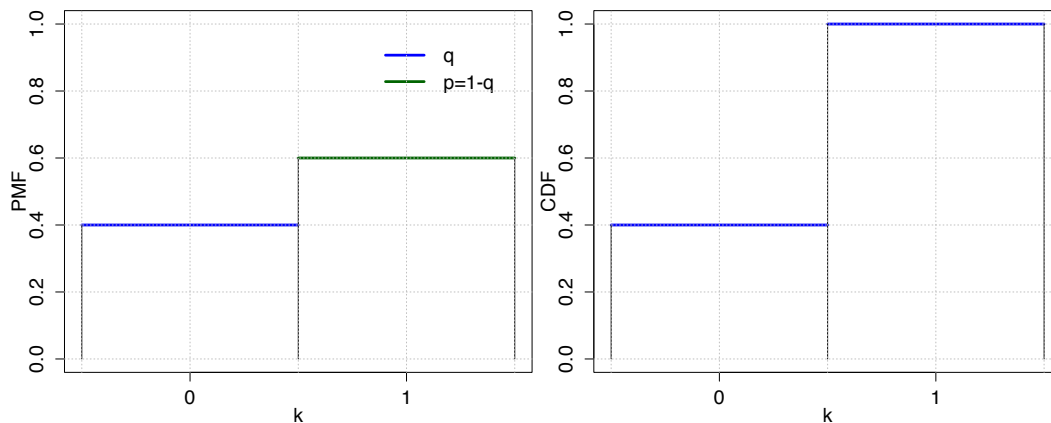

Figure 1.1: Bernoulli1 distribution plotted using the provided R code.

#### Model

125 A Bernoulli trial is a probabilistic experiment that can have one of two outcomes, success ( $x = 1$ ) or failure ( $x = 0$ ), and in which the probability of success is  $p$ .

#### Parameter: probability

**name** probability of success  
**type** scalar  
**symbol**  $p$   
**definition**  $0 < p < 1, p \in R$

#### Functions

##### PMF

$$\begin{cases} q = (1 - p) & \text{for } k = 0 \\ p & \text{for } k = 1 \end{cases}$$

130 **PMF in R**

```
q=(1-p) for k=0 \\
p for k=1
```

##### CDF

$$\begin{cases} 0 & \text{for } k < 0 \\ q & \text{for } 0 \leq k < 1 \\ 1 & \text{for } k \geq 1 \end{cases}$$

#### Characteristics

##### Mean

$p$

**Median**

$$\begin{cases} 0 & \text{if } q > p \\ 0.5 & \text{if } q = p \\ 1 & \text{if } q < p \end{cases}$$

**Mode**

$$\begin{cases} 0 & \text{if } q > p \\ 0, 1 & \text{if } q = p \\ 1 & \text{if } q < p \end{cases}$$

**Variance**

$$p(1 - p)$$

135 **Relationships**

- Relationship pair: *Bernoulli1(p)* → *Binomial1(n, p)*
- Relationship type: Transformation
- Relationship definition:  $\Sigma X(iid)$
- Relationship pair: *Binomial1(n, p)* → *Bernoulli1(p)*
- 140 - Relationship type: Special case
- Relationship definition:  $n = 1$

**References**

- [Leemis and Mcqueston, 2008]
- [https://en.wikipedia.org/wiki/Bernoulli\\_distribution](https://en.wikipedia.org/wiki/Bernoulli_distribution)
- 145 <http://www.uncertml.org/distributions/bernoulli>
- <http://www.math.wm.edu/~leemis/chart/UDR/PDFs/BinomialBernoulli.pdf>
- <http://www.math.wm.edu/~leemis/chart/UDR/PDFs/BernoulliBinomial.pdf>

**Beta1**

|                |                      |
|----------------|----------------------|
| <b>name</b>    | Beta 1 (ID: 0000057) |
| <b>type</b>    | continuous           |
| <b>variate</b> | $x$ , scalar         |
| <b>support</b> | $x \in (0, 1)$       |

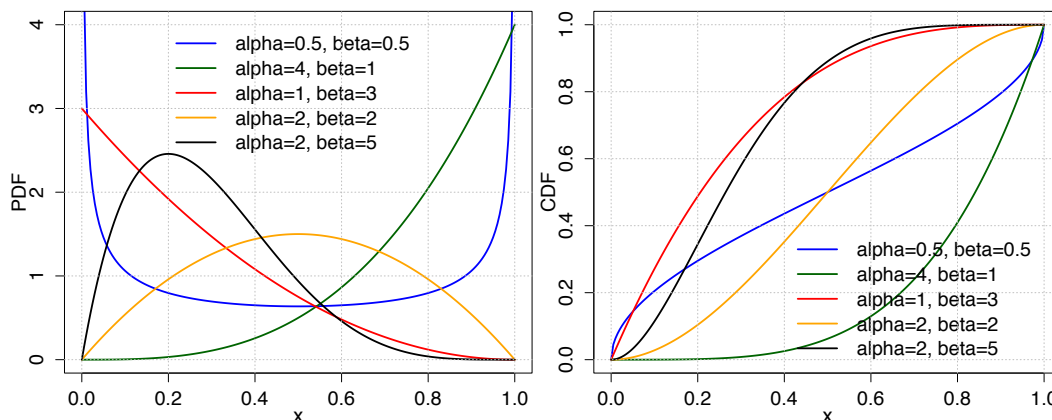

Figure 1.2: Beta1 distribution plotted using the provided R code.

150 **Parameter: alpha**

|                   |              |
|-------------------|--------------|
| <b>name</b>       | shape        |
| <b>type</b>       | scalar       |
| <b>symbol</b>     | $\alpha$     |
| <b>definition</b> | $\alpha > 0$ |



**Parameter: beta**

|                   |             |
|-------------------|-------------|
| <b>name</b>       | shape       |
| <b>type</b>       | scalar      |
| <b>symbol</b>     | $\beta$     |
| <b>definition</b> | $\beta > 0$ |

**Functions****PDF**

$$\frac{x^{\alpha-1}(1-x)^{\beta-1}}{B(\alpha, \beta)}$$

155 **PDF in R**

$(x^{(\alpha-1)}*(1-x)^{(\beta-1)})/beta(\alpha, beta)$

**CDF**

$$I_x(\alpha, \beta)$$

**CDF in R**

Rbeta(x, alpha, beta)

**Characteristics****Mean**

$$\frac{\alpha}{\alpha + \beta}$$

**Median**

$$I_{\frac{1}{2}}^{[-1]}(\alpha, \beta)$$

**Mode**

$$\frac{\alpha - 1}{\alpha + \beta - 2}$$

**Variance**

$$\frac{\alpha\beta}{(\alpha + \beta)^2(\alpha + \beta + 1)}$$

160 **Relationships**

- Relationship pair:  $Beta1(\alpha, \beta) \rightarrow Normal1(\mu, \sigma)$
- Relationship type: Special case & Limiting
- Relationship definition:  $\alpha = \beta, \beta \rightarrow \infty$
- Relationship pair:  $Gamma1(k, \theta) \rightarrow Beta1(\alpha, \beta)$
- 165 - Relationship type: Transformation
- Relationship definition:  $X_1, X_2 \sim Gamma1(k, \theta)$  and  $Y = X_1/(X_1 + X_2) \Rightarrow Y \sim Beta1(\alpha, \beta)$
- Relationship pair:  $StandardUniform1(0, 1) \rightarrow Beta1(\alpha, \beta)$
- Relationship type: Transformation
- Relationship definition:  $aX_1, X_2, \dots, X_n(iid) \sim StandardNormal1 \Rightarrow$  with  $\alpha = r$  and  $\beta = n - r + 1, X_{(r)} \sim$
- 170  $Beta(\alpha, \beta)$

**References**

[Leemis and Mcqueston, 2008]

[http://en.wikipedia.org/wiki/Beta\\_distribution](http://en.wikipedia.org/wiki/Beta_distribution)

<http://www.uncertml.org/distributions/beta>

175 <http://www.math.wm.edu/~leemis/chart/UDR/PDFs/GammaBeta.pdf>

<http://www.math.wm.edu/~leemis/chart/UDR/PDFs/BetaNormal.pdf>

<http://www.math.wm.edu/~leemis/chart/UDR/PDFs/StandarduniformBeta.pdf>

# BetaBinomial1

**name** Beta-binomial 1 (ID: 0000090)  
**type** discrete  
**variate**  $k$ , scalar  
**support**  $k \in \{0, \dots, n\}$

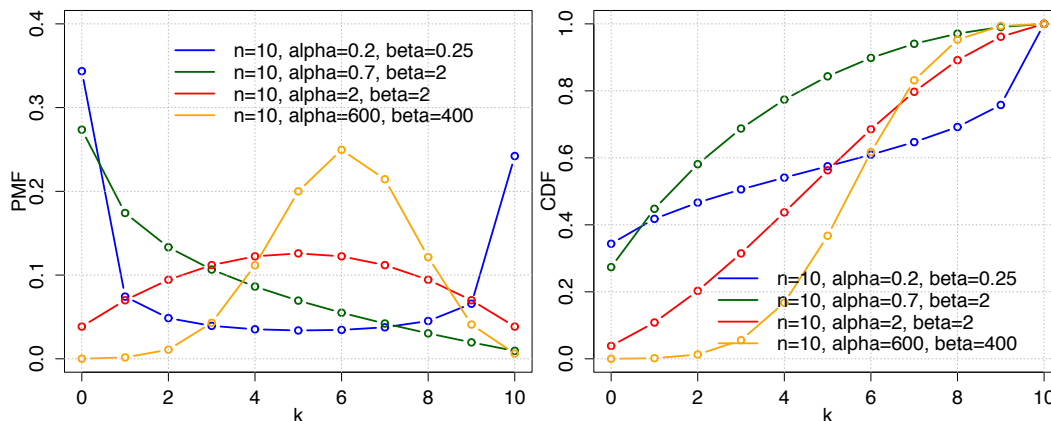

Figure 1.3: BetaBinomial1 distribution plotted using the provided R code.

180 **Model**

Beta-binomial distribution is a family of discrete probability distributions on a finite support of non-negative integers arising when the probability of success in each of a fixed or known number of Bernoulli trials is either unknown or random. The beta-binomial distribution is the binomial distribution in which the probability of success at each trial is not fixed but random and follows the beta distribution.

185 **Parameter: numberOfTrials**

**name** number of trials  
**type** scalar  
**symbol**  $n$   
**definition**  $n \in \mathbb{N}, n > 0$

**Parameter: alpha**

**name** left beta parameter  
**type** scalar  
**symbol**  $\alpha$   
**definition**  $\alpha > 0$

**Parameter: beta**

**name** right beta parameter  
**type** scalar  
**symbol**  $\beta$   
**definition**  $\beta > 0$

**Functions**

**PMF**

$$\binom{n}{k} \frac{B(k + \alpha, n - k + \beta)}{B(\alpha, \beta)}$$

**PMF in R**

`choose(n,k) * beta(k+alpha,n-k+beta) / beta(alpha,beta)`

190

**CDF**

$$\sum_{i=1}^x f(i), x \in \{0, 1, 2, \dots\}$$
 with  $f$  the PMF

**CDF in R**

195 cumsum(PMF)

**Characteristics**

**Mean**

$$\frac{n\alpha}{\alpha + \beta}$$

**Variance**

$$\frac{n\alpha\beta(\alpha + \beta + n)}{(\alpha + \beta)^2(\alpha + \beta + 1)}$$

**Relationships**

- Relationship pair:  $BetaBinomial1(n, \alpha, \beta) \rightarrow UniformDiscrete2(n)$
- Relationship type: Special case
- 200 - Relationship definition:  $\alpha = 1, \beta = 1$

**References**

[Leemis and Mcqueston, 2008]  
[https://en.wikipedia.org/wiki/Beta-binomial\\_distribution](https://en.wikipedia.org/wiki/Beta-binomial_distribution)  
<http://www.math.wm.edu/~leemis/chart/UDR/PDFs/BetabinomialRectangular.pdf>

205 **Binomial1**

**name** Binomial 1 (ID: 0000117)  
**type** discrete  
**variate**  $k$ , scalar  
**support**  $k \in \{0, \dots, n\}$

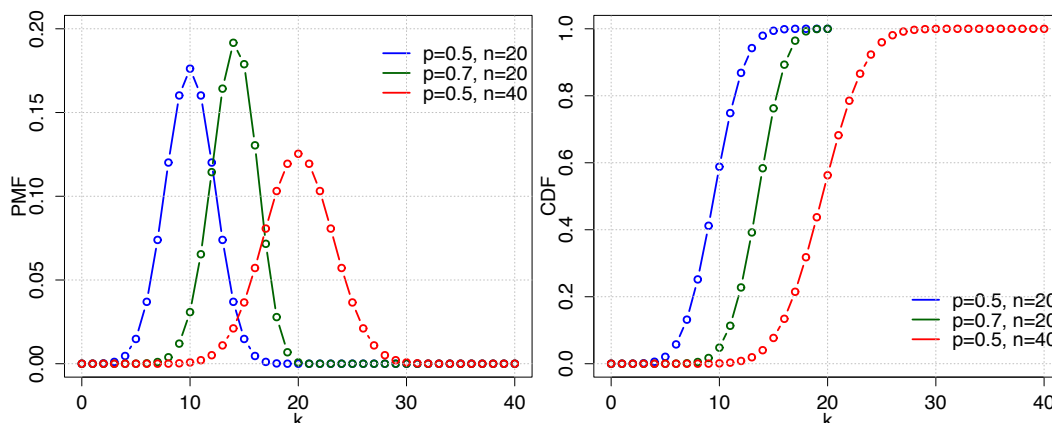

Figure 1.4: Binomial1 distribution plotted using the provided R code.

**Model**

Binomial distribution with parameters  $n$  and  $p$  is the probability distribution of the number of successes in a sequence of  $n$  independent yes/no experiments (Bernoulli trial) each of which yields success with probability  $p$ .

210

**Parameter: numberOfTrials**

|                   |                              |
|-------------------|------------------------------|
| <b>name</b>       | number of trials             |
| <b>type</b>       | scalar                       |
| <b>symbol</b>     | $n$                          |
| <b>definition</b> | $n \in \mathbb{N}, n \geq 0$ |

**Parameter: probability**

|                   |                                   |
|-------------------|-----------------------------------|
| <b>name</b>       | success probability in each trial |
| <b>type</b>       | scalar                            |
| <b>symbol</b>     | $p$                               |
| <b>definition</b> | $p \in [0, 1]$                    |

215 **Functions****PMF**

$$\binom{n}{k} p^k (1-p)^{n-k}$$

**PMF in R**

choose(n,k) \* p^k\*(1-p)^(n-k)

**CDF**

$$I_{1-p}(n-k, 1+k)$$

**CDF in R**

Rbeta(1-p, n-k, 1+k)

220 **Characteristics****Mean**

$$np$$

**Median**

$$\lfloor np \rfloor \text{ or } \lceil np \rceil$$

**Mode**

$$\lfloor (n+1)p \rfloor \text{ or } \lfloor (n+1)p \rfloor - 1$$

**Variance**

$$np(1-p)$$

**Relationships**

- Relationship pair:  $Binomial1(n, p) \rightarrow Bernoulli1(p)$
- Relationship type: Special case
- Relationship definition:  $n = 1$
- 225 - Relationship pair:  $Binomial1(n, p) \rightarrow Poisson1(\lambda)$
- Relationship type: Reparameterisation & Limiting
- Relationship definition:  $\lambda = np, n \rightarrow \infty$
- Relationship pair:  $Binomial1(n, p) \rightarrow Normal1(\mu, \sigma)$
- Relationship type: Limiting
- 230 - Relationship definition: For  $X \sim Binomial1(n, p)$  as  $n \rightarrow \infty$ ,  $X$  is approximately normally distributed  $Normal1(\mu, \sigma)$  with  $\mu = np, \sigma = np(1-p)$ .
- Relationship pair:  $ConwayMaxwellPoisson1(\lambda, \nu) \rightarrow Binomial1(p)$
- Relationship type: Transformation
- Relationship definition: For  $\nu = \infty$  the distribution of the sum is binomial with parameters
- 235  $n$  and  $\lambda/(1+\lambda)$
- Relationship pair:  $Hypergeometric1(N, K, n) \rightarrow Binomial1(n, p)$
- Relationship type: Reparameterisation & Limiting

- Relationship definition:  $p = K/N, n = n, N \rightarrow \infty$
- Relationship pair:  $Bernoulli1(p) \rightarrow Binomial1(n, p)$
- 240 - Relationship type: Transformation
- Relationship definition:  $\Sigma X(iid)$
- Relationship pair:  $GeneralizedNegativeBinomial1(\theta, \beta, m) \rightarrow Binomial1(n, p)$
- Relationship type: Special case & Reparameterisation
- Relationship definition:  $\beta = 0$  and set  $m = n, \theta = p$

245 **References**

- [Leemis and Mcqueston, 2008], [Consul and Famoye, 2006]
- [https://en.wikipedia.org/wiki/Binomial\\_distribution](https://en.wikipedia.org/wiki/Binomial_distribution)
- <http://www.uncertml.org/distributions/binomial>
- <http://www.math.wm.edu/~leemis/chart/UDR/PDFs/BinomialBernoulli.pdf>
- 250 <http://www.math.wm.edu/~leemis/chart/UDR/PDFs/BinomialPoisson.pdf>
- <http://www.math.wm.edu/~leemis/chart/UDR/PDFs/HypergeometricBinomial.pdf>
- <http://www.math.wm.edu/~leemis/chart/UDR/PDFs/BernoulliBinomial.pdf>
- <http://www.math.wm.edu/~leemis/chart/UDR/PDFs/BinomialNormal.pdf>

## BirnbaumSaunders1

|     |                                                                                                                                               |
|-----|-----------------------------------------------------------------------------------------------------------------------------------------------|
| 255 | <b>name</b> Birnbaum-Saunders 1 (ID: 0000177)<br><b>type</b> continuous<br><b>variate</b> $x$ , scalar<br><b>support</b> $x \in (0, +\infty)$ |
|-----|-----------------------------------------------------------------------------------------------------------------------------------------------|

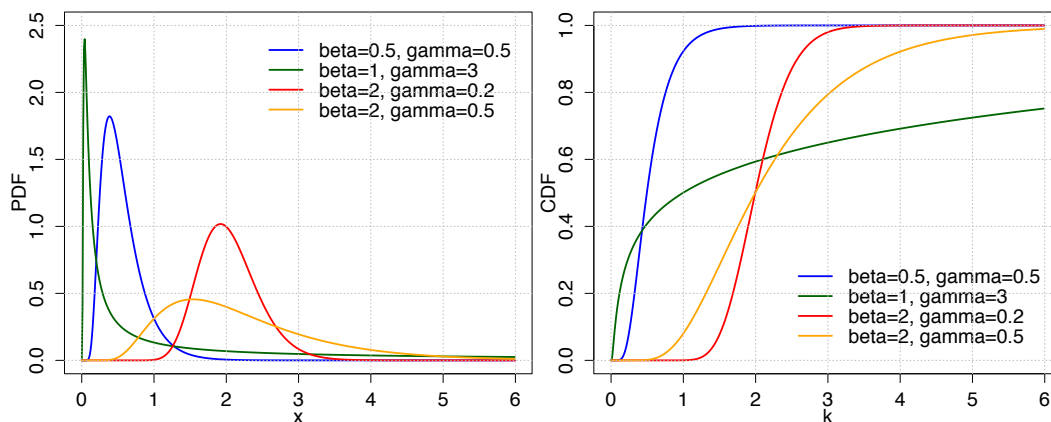

Figure 1.5: BirnbaumSaunders1 distribution plotted using the provided R code.

**Parameter: scale**

|                   |             |
|-------------------|-------------|
| <b>name</b>       | scale       |
| <b>type</b>       | scalar      |
| <b>symbol</b>     | $\beta$     |
| <b>definition</b> | $\beta > 0$ |

**Parameter: shape**

|                   |              |
|-------------------|--------------|
| <b>name</b>       | shape        |
| <b>type</b>       | scalar       |
| <b>symbol</b>     | $\gamma$     |
| <b>definition</b> | $\gamma > 0$ |

260 **Functions****PDF**

$$\frac{1}{\sqrt{2\pi}} \exp \left[ -\frac{(\sqrt{x/\beta} - \sqrt{\beta/x})^2}{2\gamma^2} \right] \left[ \frac{\sqrt{x/\beta} + \sqrt{\beta/x}}{2\gamma x} \right]$$

**PDF in R**

```
1/(sqrt(2*pi))* exp( -(sqrt(x/beta) - sqrt(beta/x))^2 / (2*gamma^2) ) *
( sqrt(x/beta) + sqrt(beta/x) ) / (2*gamma*x)
```

**CDF**

$$\int_0^x f(x), \text{ with } f \text{ the PDF}$$

**CDF in R**

```
265 cumsum(PDF*rep(stepSize,length(PDF)))
```

**References**

[MathWorks, 2015]

[https://en.wikipedia.org/wiki/Birnbaum%E2%80%93Saunders\\_distribution](https://en.wikipedia.org/wiki/Birnbaum%E2%80%93Saunders_distribution)

**CategoricalNonordered1**

270 **name** Categorical Nonordered 1 (ID: 0000248)  
**type** discrete  
**variate**  $x$ , scalar  
**support**  $x \in \{1, \dots, k\}$

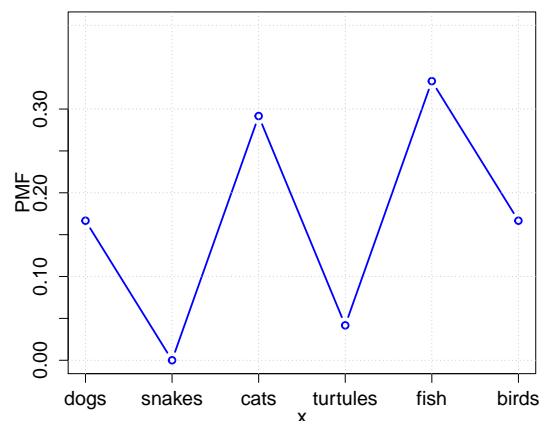

Figure 1.6: CategoricalNonordered1 distribution plotted using the provided R code.

**Parameter: categoryProb**

**name** category probabilities  
**type** vector  
**symbol**  $p_1, \dots, p_k$   
**definition**  $0 \leq p_i \leq 1, \sum p_i = 1$

**Functions****PMF**

$$p(x = i) = p_i$$

**CDF**

*undefined*

275 **Characteristics****Mean**

$E([x = i]) = p_i$ , this is the mean of the Iverson bracket  $[x = i]$  and not the mean of  $x$

**Median**

$$i \text{ such that } \sum_{j=1}^{i-1} p_j \leq 0.5 \text{ and } \sum_{j=1}^i p_j \geq 0.5$$

**Mode**

$$i \text{ such that } p_i = \max(p_1, \dots, p_k)$$

**Variance**

$$\text{Var}([x = i]) = p_i(1 - p_i) \text{Cov}([x = i], [x = j]) = -p_i p_j \quad (i \neq j)$$

**References**

[http://en.wikipedia.org/wiki/Categorical\\_distribution](http://en.wikipedia.org/wiki/Categorical_distribution)

**CategoricalOrdered1**

|                |                                     |
|----------------|-------------------------------------|
| <b>name</b>    | Categorical Ordered 1 (ID: 0000224) |
| <b>type</b>    | discrete                            |
| <b>variate</b> | $x$ , scalar                        |
| <b>support</b> | $x \in \{1, \dots, k\}$             |

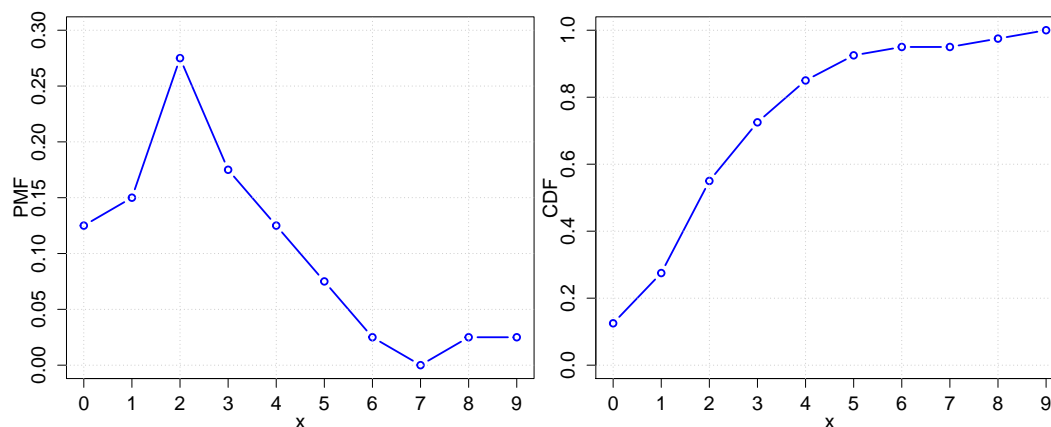

Figure 1.7: CategoricalOrdered1 distribution plotted using the provided R code.

280 **Parameter: categoryProb**

|                   |                                   |
|-------------------|-----------------------------------|
| <b>name</b>       | category probabilities            |
| <b>type</b>       | vector                            |
| <b>symbol</b>     | $p_1, \dots, p_k$                 |
| <b>definition</b> | $0 \leq p_i \leq 1, \sum p_i = 1$ |

**Functions****PMF**

$$p(x = i) = p_i$$

**CDF**

$$\begin{cases} 0 & \text{for } x < 1 \\ \sum_{j=1}^i p_j & \text{for } x \in [i, i + 1) \\ 1 & \text{for } x \geq k \end{cases}$$

**Characteristics****Mean**

$E([x = i]) = p_i$ , this is the mean of the Iverson bracket  $[x = i]$  and not the mean of  $x$

**Median**

$$i \text{ such that } \sum_{j=1}^{i-1} p_j \leq 0.5 \text{ and } \sum_{j=1}^i p_j \geq 0.5$$

**Mode**

$$i \text{ such that } p_i = \max(p_1, \dots, p_k)$$

**Variance**

$$\text{Var}([x = i]) = p_i(1 - p_i) \text{Cov}([x = i], [x = j]) = -p_i p_j \quad (i \neq j)$$

285 **References**

[http://en.wikipedia.org/wiki/Categorical\\_distribution](http://en.wikipedia.org/wiki/Categorical_distribution)

**Cauchy1**

**name** Cauchy 1 (ID: 0000274)  
**type** continuous  
**variate**  $x$ , scalar  
**support**  $x \in (-\infty, +\infty)$

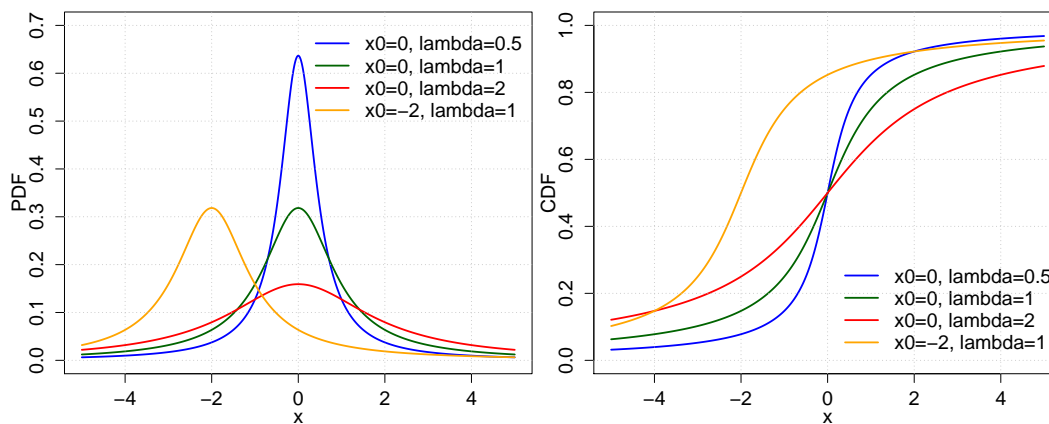

Figure 1.8: Cauchy1 distribution plotted using the provided R code.

**Parameter: location**

**name** location  
**type** scalar  
**symbol**  $x_0$   
**definition**  $x_0 \in R$

290

**Parameter: scale**

**name** scale  
**type** scalar  
**symbol**  $\gamma$   
**definition**  $\gamma \in R$



**Functions****PDF**

$$\frac{1}{\pi\gamma \left[ 1 + \left( \frac{x-x_0}{\gamma} \right)^2 \right]}$$

**PDF in R**

295 1 / (pi\*gamma\*(1 + ((x-x0)^2/gamma^2)))

**CDF**

$$\frac{1}{\pi} \arctan \left( \frac{x - x_0}{\gamma} \right) + \frac{1}{2}$$

**CDF in R**

1/pi \* atan((x-x0)/gamma)+1/2

**Characteristics****Mean**

*undefined*

**Median**

$x_0$

**Mode**

$x_0$

**Variance**

*undefined*

**Referenes**

300 [http://en.wikipedia.org/wiki/Cauchy\\_distribution](http://en.wikipedia.org/wiki/Cauchy_distribution)  
<http://www.uncertml.org/distributions/cauchy>

**ChiSquared1**

**name** Chi-squared 1 (ID: 0000299)  
**type** continuous  
**variate**  $x$ , scalar  
**support**  $x \in [0, +\infty)$

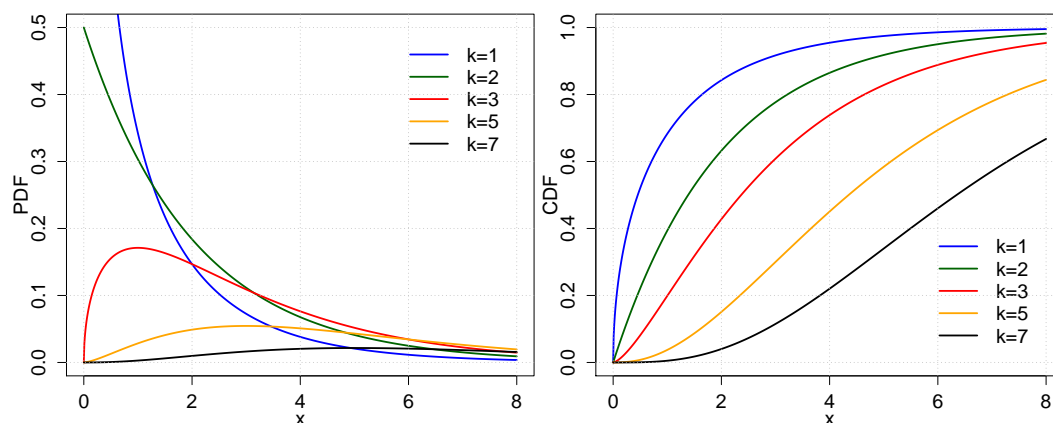

Figure 1.9: ChiSquared1 distribution plotted using the provided R code.

**Parameter: degreesOfFreedom**

|                   |                    |
|-------------------|--------------------|
| <b>name</b>       | degrees of freedom |
| <b>type</b>       | scalar             |
| <b>symbol</b>     | $k$                |
| <b>definition</b> | $k \in \mathbb{N}$ |

**Functions****PDF**

$$\frac{1}{2^{\frac{k}{2}} \Gamma\left(\frac{k}{2}\right)} x^{\frac{k}{2}-1} e^{-\frac{x}{2}}$$

**PDF in R**

1/( 2<sup>k/2</sup> \* gamma(k/2) ) \* x<sup>(k/2-1)</sup> \* exp(-x/2)

**CDF**

$$\frac{1}{\Gamma\left(\frac{k}{2}\right)} \gamma\left(\frac{k}{2}, \frac{x}{2}\right)$$

**CDF in R**

1/gamma(k/2) \* Igamma(k/2, x/2)

**Characteristics****Mean**

$$k$$

**Median**

$$\approx k \left(1 - \frac{2}{9k}\right)^3$$

**Mode**

$$\max\{k - 2, 0\}$$

**Variance**

$$2k$$

**Relationships**

- Relationship pair:  $ChiSquared1(k) \rightarrow Exponential1(\lambda)$
- Relationship type: Special case
- 315 - Relationship definition:  $k = 2$  and  $\lambda = 1/2$
- Relationship pair:  $ChiSquared1(n) \rightarrow F1(n_1, n_2)$
- Relationship type: Transformation
- Relationship definition: If  $X_1 \sim ChiSquared1(n_1), X_2 \sim ChiSquared1(n_2)$  are independent random variables  $\Rightarrow \frac{X_1/n_1}{X_2/n_2} \sim F1(n_1, n_2)$
- 320 - Relationship pair:  $GeneralizedGamma2(a, b, c, k) \rightarrow ChiSquared1(k)$
- Relationship type: Special case & Reparameterisation
- Relationship definition:  $a = 0, b = 2, c = k_{ChiSquare1}/2, k = 1$
- Relationship pair:  $StandardNormal1(0, 1) \rightarrow ChiSquared1(k)$
- Relationship type: Transformation
- 325 - Relationship definition:  $\Sigma X^2$
- Relationship pair:  $InverseGaussian1(\lambda, \mu) \rightarrow ChiSquared1(k)$
- Relationship type: Transformation
- Relationship definition:  $X \sim InverseGaussian1(\lambda, \mu)$  and  $Y = \lambda(X - \mu)^2 / (\mu^2 X) \Rightarrow Y \sim ChiSquared1(k)$
- Relationship pair:  $Normal1(\mu, \sigma) \rightarrow ChiSquared1(n)$
- 330 - Relationship type: Transformation
- Relationship definition: If  $X_i \sim N(\mu, \sigma), i = 1, 2, \dots, n$  are mutually independent and identically distributed random variables and  $Y = \sum_{i=1}^n ((X_i - \mu)/\sigma)^2 \Rightarrow Y \sim ChiSquared1(n)$

- Relationship pair:  $\text{Gamma1}(k, \theta) \rightarrow \text{ChiSquared1}(n)$
- Relationship type: Special case
- 335 - Relationship definition:  $k_{\text{ChiSquared1}} = 2k, \theta = 2$
- Relationship pair:  $F1(n_1, n_2) \rightarrow \text{ChiSquared1}(n)$
- Relationship type: Limiting
- Relationship definition: If  $X \sim F1(n_1, n_2)$ , the limiting distribution of  $n_1 X$  as  $n_2 \rightarrow \infty$  is the chi-square distribution with  $n_1$  degrees of freedom

340 **References**

- [Leemis and Mcqueston, 2008]
- [http://en.wikipedia.org/wiki/Chi-squared\\_distribution](http://en.wikipedia.org/wiki/Chi-squared_distribution)
- <http://www.uncertml.org/distributions/chi-square>
- <http://www.math.wm.edu/~leemis/chart/UDR/PDFs/StandardnormalChisquare.pdf>
- 345 <http://www.math.wm.edu/~leemis/chart/UDR/PDFs/ChisquareExponential.pdf>
- <http://www.math.wm.edu/~leemis/chart/UDR/PDFs/InversegaussianChisquare.pdf>
- <http://www.math.wm.edu/~leemis/chart/UDR/PDFs/NormalChisquare.pdf>
- <http://www.math.wm.edu/~leemis/chart/UDR/PDFs/GammaChisquareT.pdf>
- <http://www.math.wm.edu/~leemis/chart/UDR/PDFs/ChisquareF.pdf>
- 350 <http://www.math.wm.edu/~leemis/chart/UDR/PDFs/FChisquare.pdf>

## ConwayMaxwellPoisson1

**name** Conway-Maxwell-Poisson 1 (ID: 0000323)  
**type** discrete  
**variate**  $x$ , scalar  
**support**  $x \in \{0, 1, 2, 3, \dots\}$

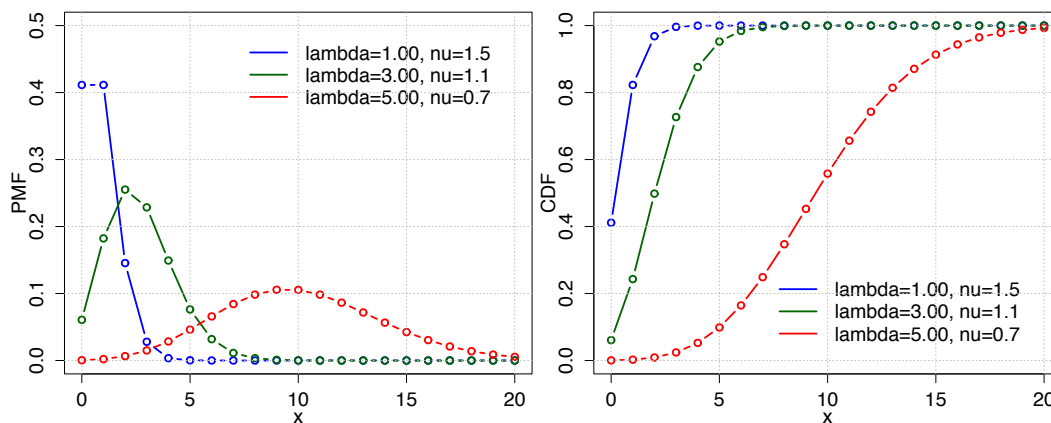

Figure 1.10: ConwayMaxwellPoisson1 distribution plotted using the provided R code.

**Parameter: rate**

**name** Poisson intensity  
**type** scalar  
 355 **symbol**  $\lambda$   
**definition**  $\lambda \in R, \lambda > 0$

**Parameter: rateOfDecay**

**name** rate of decay  
**type** scalar  
**symbol**  $\nu$   
**definition**  $\nu \geq 0$

**Functions****PMF**

$$\frac{\lambda^x}{(x!)^\nu} \frac{1}{Z(\lambda, \nu)} \text{ with } Z(\lambda, \nu) = \sum_{j=0}^{\infty} \frac{\lambda^j}{(j!)^\nu}$$

**PMF in R**

```
360 lambda^x/(factorial(x))^nu*1/Z(lambda,nu,n);
Z(lambda,nu,n): for(i in 0:n) { Z=Z+lambda^i/(factorial(i))^nu }
```

**CDF**

$$\sum_{i=1}^x f(i), x \in \{0, 1, 2, \dots\} \text{ with } f \text{ the PMF}$$

**CDF in R**

```
cumsum(PMF)
```

**Characteristics****Mean**

$$\sum_{j=0}^{\infty} \frac{j\lambda^j}{(j!)^\nu Z(\lambda, \nu)}$$

**Median**

No closed form

**Variance**

$$\sum_{j=0}^{\infty} \frac{j^2\lambda^j}{(j!)^\nu Z(\lambda, \nu)} - \text{Mean}^2$$

**365 Relationships**

- Relationship pair: *ConwayMaxwellPoisson1*( $\lambda, \nu$ )  $\rightarrow$  *Poisson1*( $\lambda$ )
- Relationship type: Transformation
- Relationship definition: For  $\nu = 1$  the sum has a Poisson distribution with parameter  $n\lambda$
- Relationship pair: *ConwayMaxwellPoisson1*( $\lambda, \nu$ )  $\rightarrow$  *Binomial1*( $p$ )
- 370 - Relationship type: Transformation
- Relationship definition: For  $\nu = \infty$  the distribution of the sum is binomial with parameters  $n$  and  $\lambda/(1 + \lambda)$
- Relationship pair: *ConwayMaxwellPoisson1*( $\lambda, \nu$ )  $\rightarrow$  *NegativeBinomial1*( $r, p$ )
- Relationship type: Transformation
- 375 - Relationship definition: For  $\nu = 0$  and  $\lambda < 1$  the sum of Conway-Maxwell-Poisson distributed variables reduces to the sum of geometric variables, which follows a Negative Binomial distribution with parameters  $n$  and  $1 - \lambda$

**References**

[Shmueli et al., 2005]

```
380 https://en.wikipedia.org/wiki/Conway%E2%80%93Poisson\_distribution
```

**Dirichlet1**

|                |                                                                     |
|----------------|---------------------------------------------------------------------|
| <b>name</b>    | Dirichlet 1 (ID: 0000345)                                           |
| <b>type</b>    | continuous                                                          |
| <b>variate</b> | $x$ , vector                                                        |
| <b>support</b> | $x_1, \dots, x_K$ where $x_i \in [0, 1]$ and $\sum_{i=1}^K x_i = 1$ |

**Parameter: concentration**

|                   |                                           |
|-------------------|-------------------------------------------|
| <b>name</b>       | concentration                             |
| <b>type</b>       | vector                                    |
| <b>symbol</b>     | $\alpha_1, \dots, \alpha_K$               |
| <b>definition</b> | $\alpha_1, \dots, \alpha_K, \alpha_i > 0$ |

385 **Functions**

**PDF**

$$\frac{1}{B(\alpha)} \prod_{i=1}^K x_i^{\alpha_i-1} \text{ where } B(\alpha) = \frac{\prod_{i=1}^K \Gamma(\alpha_i)}{\Gamma(\sum_{i=1}^K \alpha_i)} \text{ where } \alpha = (\alpha_1, \dots, \alpha_K)$$

**Characteristics**

**Mean**

$$E[X_i] = \frac{\alpha_i}{\sum_k \alpha_k}$$

**Mode**

$$x_i = \frac{\alpha_i - 1}{\sum_{i=1}^K \alpha_i - K}, \quad \alpha_i > 1$$

**Variance**

$$Var[X_i] = \frac{\alpha_i(\alpha_0 - \alpha_i)}{\alpha_0^2(\alpha_0 + 1)} \text{ where } \alpha_0 = \sum_{i=1}^K \alpha_i \text{ Cov}[X_i, X_j] = \frac{-\alpha_i \alpha_j}{\alpha_0^2(\alpha_0 + 1)} \quad (i \neq j)$$

**References**

[http://en.wikipedia.org/wiki/Dirichlet\\_distribution](http://en.wikipedia.org/wiki/Dirichlet_distribution)

390 <http://www.uncertml.org/distributions/dirichlet>

## DoublePoisson1

|                |                                |
|----------------|--------------------------------|
| <b>name</b>    | Double Poisson 1 (ID: 0000370) |
| <b>type</b>    | discrete                       |
| <b>variate</b> | $x$ , scalar                   |
| <b>support</b> | $x \in \{1, 2, 3, \dots, n\}$  |

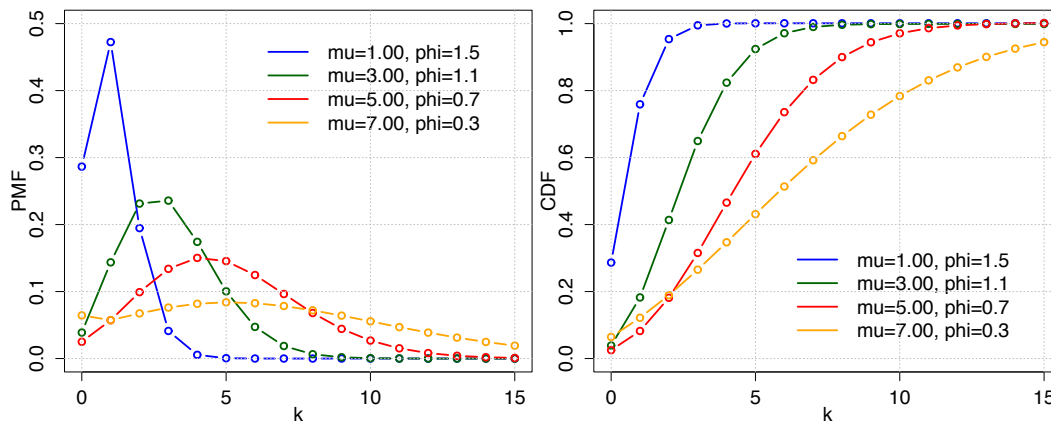

Figure 1.11: DoublePoisson1 distribution plotted using the provided R code.

**Parameter: rate**

**name** Poisson intensity  
**type** scalar  
**symbol**  $\mu$   
**definition**  $\mu \in R, \mu > 0$

395 **Parameter: dispersion**

**name** dispersion  
**type** scalar  
**symbol**  $\phi$   
**definition**  $\phi \in R$

**Functions**

**PMF**

$$K(\mu, \phi)\phi^{1/2} \exp(-\phi\mu) \frac{\exp(-y)y^y}{y!} \left(\frac{e\mu}{y}\right)^{\phi y} \text{ with } \frac{1}{K(\mu, \phi)} \approx 1 + \frac{1-\phi}{12\phi\mu} \left(1 + \frac{1}{\phi\mu}\right)$$

**PMF in R**

400 `K(mu,phi) * phi^(1/2) * exp(-phi*mu) * (exp(-y)*y^y)/factorial(y) * (exp(1)*mu/y)^(phi*y) \\  
\text{ with } K(mu,phi) = 1 + (1-phi)/(12*mu*phi)*(1 + 1/(mu*phi))`

**CDF**

$$\sum_{i=1}^x f(i), x \in \{0, 1, 2, \dots\} \text{ with } f \text{ the PMF}$$

**CDF in R**

`cumsum(PMF)`

**Characteristics**

**Mean**

$$\mu$$

**Variance**

$$\mu/\phi$$

**Relationships**

- 405 - Relationship pair: *DoublePoisson1*( $\mu, \phi$ )  $\rightarrow$  *Poisson1*( $\lambda$ )  
- Relationship type: Special case  
- Relationship definition:  $\phi = 1$

**References**

[Cameron and Trivedi, 2013]  
410 <http://support.sas.com/resources/papers/proceedings09/250-2009.pdf>

**Erlang1**

**name** Erlang 1 (ID: 0000392)  
**type** continuous  
**variate**  $x$ , scalar  
**support**  $x \in [0, +\infty)$  (Forbes),  $x \in (0, +\infty)$  (Leemis)

**Parameter: scale**

**name** scale  
**type** scalar  
**symbol**  $b$   
**definition**  $b > 0$

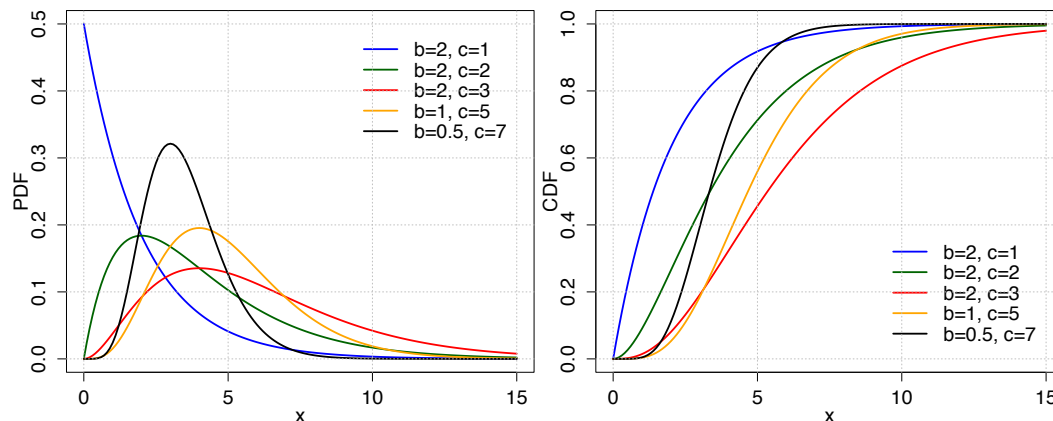

Figure 1.12: Erlang1 distribution plotted using the provided R code.

415 **Parameter: shape**

|                   |         |
|-------------------|---------|
| <b>name</b>       | shape   |
| <b>type</b>       | scalar  |
| <b>symbol</b>     | $c$     |
| <b>definition</b> | $c > 0$ |

**Functions**

**PDF**

$$\frac{(x/b)^{c-1} \exp(-x/b)}{b(c-1)!}$$

**PDF in R**

`((x/b)^(c-1) * exp(-x/b)) / (b * factorial(c-1))`

**CDF**

$$1 - \left[ \exp\left(-\frac{x}{b}\right) \right] \left( \sum_{i=0}^{c-1} \frac{(x/b)^i}{i!} \right)$$

420 **CDF in R**

R function

**Characteristics**

**Mean**

$$bc$$

**Mode**

$$b(c-1), c \geq 1$$

**Variance**

$$b^2c$$

**Relationships**

- Relationship pair:  $Erlang1(b, c) \rightarrow Exponential2(\beta)$
- 425 - Relationship type: Special case
- Relationship definition:  $c = 1, b = \beta$
- Relationship pair:  $Gamma1(k, \theta) \rightarrow Erlang1(b, c)$
- Relationship type: Special case
- Relationship definition:  $k \in \mathbb{N}, k = c, \theta = b$

430 **References**

[Forbes et al., 2011], [Leemis and Mcqueston, 2008]  
<http://www.math.wm.edu/~leemis/chart/UDR/PDFs/GammaErlang.pdf>  
<http://www.math.wm.edu/~leemis/chart/UDR/PDFs/Erlang.pdf>

**Exponential1**

435 **name** Exponential 1 (ID: 0000418)  
**type** continuous  
**variate**  $x$ , scalar  
**support**  $x \in [0, +\infty)$

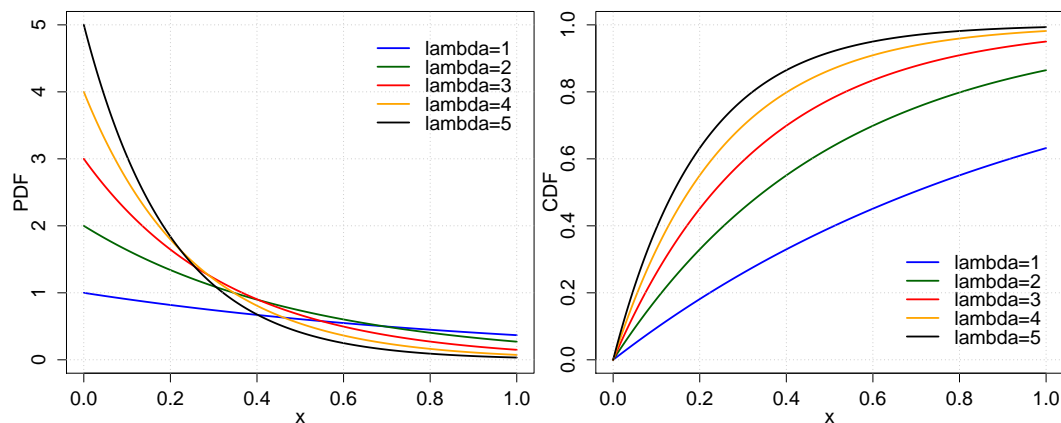

Figure 1.13: Exponential1 distribution plotted using the provided R code.

**Parameter: rate**

**name** rate or inverse scale  
**type** scalar  
**symbol**  $\lambda$   
**definition**  $\lambda > 0$

**Functions****PDF**

$$\lambda e^{-\lambda x}$$

**PDF in R**

440 `lambda*exp(-lambda*x)`

**CDF**

$$1 - \exp(-\lambda x)$$

**CDF in R**

`1 - exp(-lambda*x)`

**Characteristics****Mean**

$$\lambda^{-1}$$

**Median**

$$\lambda^{-1} \ln(2)$$

**Mode**

$$0$$

**Variance**

$$\lambda^{-2}$$



**Relationships**

- 445 - Relationship pair:  $Exponential1(\lambda) \rightarrow Exponential2(\beta)$
- Relationship type: Reparameterisation
- Relationship definition:  $\beta = 1/\lambda$
- Relationship pair:  $Pareto1(x_m, \alpha) \rightarrow Exponential1(\lambda)$
- Relationship type: Transformation
- 450 - Relationship definition:  $X \sim Pareto1, Y = \log(X/\lambda) \Rightarrow Y \sim Exponential1$
- Relationship pair:  $GeneralizedGamma2(a, b, c, k) \rightarrow Exponential1(\lambda)$
- Relationship type: Special case & Reparameterisation
- Relationship definition:  $k = c = 1, a = 0, b = 1/\lambda$
- Relationship pair:  $Gamma1(k, \theta) \rightarrow Exponential1(\lambda)$
- 455 - Relationship type: Special case & Reparameterisation
- Relationship definition:  $k = 1, \theta = 1/\lambda$
- Relationship pair:  $Weibull1(\lambda, k) \rightarrow Exponential1(\lambda_{Exponential})$
- Relationship type: Special case & Reparameterisation
- Relationship definition:  $k = 1, \lambda_{Exponential} = 1/\lambda$
- 460 - Relationship pair:  $ChiSquared1(k) \rightarrow Exponential1(\lambda)$
- Relationship type: Special case
- Relationship definition:  $k = 2$  and  $\lambda = 1/2$
- Relationship pair:  $StandardUniform1(0, 1) \rightarrow Exponential1(\lambda)$
- Relationship type: Transformation
- 465 - Relationship definition:  $-\frac{1}{\lambda} \log(X)$
- Relationship pair:  $Exponential2(\beta) \rightarrow Exponential1(\lambda)$
- Relationship type: Reparameterisation
- Relationship definition:  $\lambda = 1/\beta$

**References**

- 470 [Leemis and Mcqueston, 2008], [Forbes et al., 2011]
- [http://en.wikipedia.org/wiki/Exponential\\_distribution](http://en.wikipedia.org/wiki/Exponential_distribution)
- <http://www.uncertml.org/distributions/exponential>
- <http://www.math.wm.edu/~leemis/chart/UDR/PDFs/ChisquareExponential.pdf>
- <http://www.math.wm.edu/~leemis/chart/UDR/PDFs/StandarduniformExponentialB.pdf>
- 475 <http://www.math.wm.edu/~leemis/chart/UDR/PDFs/ParetoExponential.pdf>

**Exponential2**

**name** Exponential 2 (ID: 0000443)  
**type** continuous  
**variate**  $x$ , scalar  
**support**  $x \in [0, +\infty)$

**Parameter: mean**

**name** scale  
**type** scalar  
**symbol**  $\beta$   
**definition**  $\beta > 0$

480 **Functions****PDF**

$$1/\beta e^{-x/\beta}$$

**PDF in R**

`1/beta*exp(-1/beta*x)`

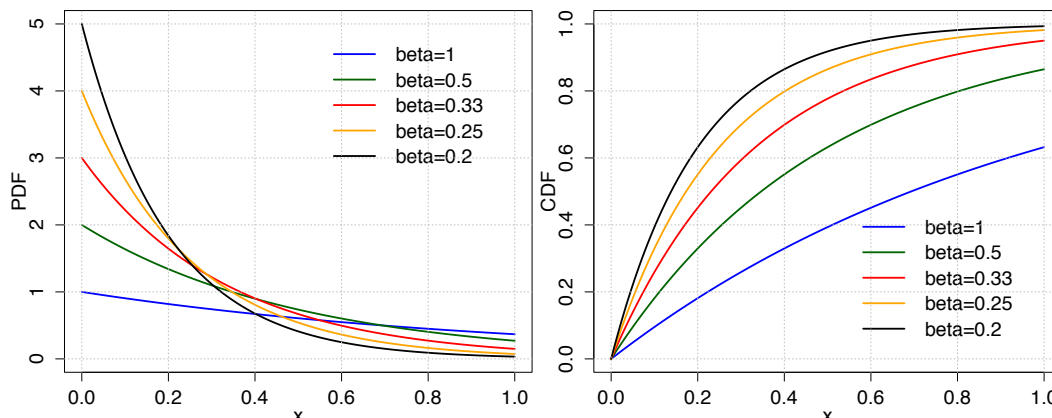

Figure 1.14: Exponential2 distribution plotted using the provided R code.

**CDF**

$$1 - \exp(-x/\beta)$$

**CDF in R**

1 - exp(-x/beta)

485 **Characteristics**

**Mean**

$$\beta$$

**Median**

$$\lambda^{-1} \ln(2)$$

**Mode**

$$0$$

**Variance**

$$\beta^2$$

**Relationships**

- Relationship pair: *Exponential2*( $\beta$ )  $\rightarrow$  *Exponential1*( $\lambda$ )
- Relationship type: Reparameterisation
- Relationship definition:  $\lambda = 1/\beta$
- 490 - Relationship pair: *Exponential2*(1)  $\rightarrow$  *F1*( $n_1, n_2$ )
- Relationship type: Transformation
- Relationship definition: If  $X_1, X_2 \sim \text{Exponential2}(1)$  mutually independent and identically distributed random variables  $\Rightarrow X_1/X_2$  has the *F1* distribution
- Relationship pair: *Exponential1*( $\lambda$ )  $\rightarrow$  *Exponential2*( $\beta$ )
- 495 - Relationship type: Reparameterisation
- Relationship definition:  $\beta = 1/\lambda$
- Relationship pair: *Erlang1*( $b, c$ )  $\rightarrow$  *Exponential2*( $\beta$ )
- Relationship type: Special case
- Relationship definition:  $c = 1, b = \beta$

500 **References**

[Forbes et al., 2011], [Leemis and Mcqueston, 2008]  
<http://www.itl.nist.gov/div898/handbook/eda/section3/eda3667.htm>  
<http://www.math.wm.edu/~leemis/chart/UDR/PDFs/Exponential.pdf>  
<http://www.math.wm.edu/~leemis/chart/UDR/PDFs/ExponentialF.pdf>

505 **F1**

**name** F 1 (ID: 0000492)  
**type** continuous  
**variate**  $x$ , scalar  
**support**  $x \in [0, +\infty)$

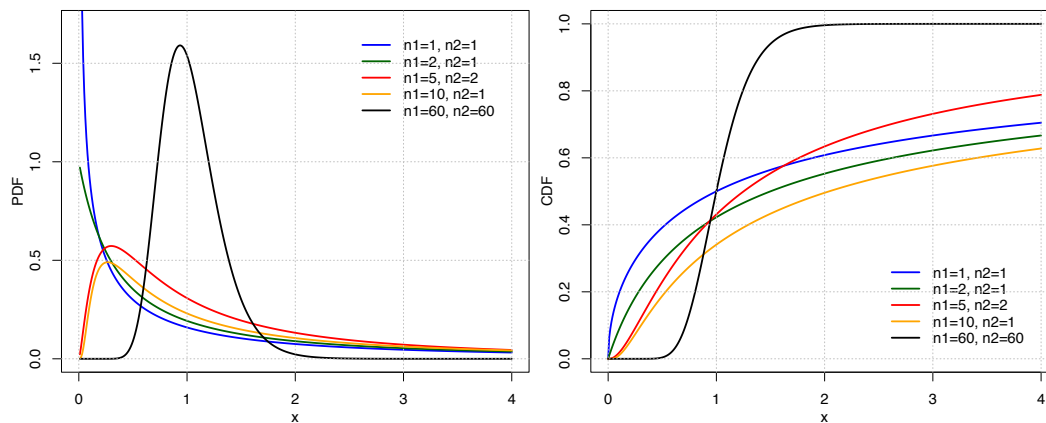

Figure 1.15: F1 distribution plotted using the provided R code.

**Parameter: numerator**

**name** degree of freedom  
**type** scalar  
**symbol**  $n_1$   
**definition**  $n_1 > 0$

**Parameter: denominator**

**name** degree of freedom  
**type** scalar  
**symbol**  $n_2$   
**definition**  $n_2 > 0$

**Functions****PDF**

$$\frac{\Gamma\left(\frac{n_1+n_2}{2}\right)\left(\frac{n_1}{n_2}\right)^{n_1/2}x^{n_1/2-1}}{\Gamma\left(\frac{n_1}{2}\right)\Gamma\left(\frac{n_2}{2}\right)\left[\frac{n_1}{n_2}x+1\right]^{(n_1+n_2)/2}}$$

**PDF in R**

```
gamma((n1 + n2)/2)*(n1/n2)^(n1/2)*x^(n1/2-1)/(gamma(n1/2)*gamma(n2/2)*(n1/n2*x+1)^((n1+n2)/2))
```

**CDF**

$$I_{\frac{n_1 x}{n_1 x + n_2}}\left(\frac{n_1}{2}, \frac{n_2}{2}\right)$$

**CDF in R**

```
515 Rbeta(n1*x / (n1*x + n2), n1/2, n2/2)
```

**Characteristics****Mean**

$$n_2 / (n_2 - 2), n_2 > 2$$

**Mode**

$$\frac{n_2(n_1 - 2)}{n_1(n_2 + 2)}, n_1 > 2$$

**Variance**

$$\frac{2n_2^2(n_1 + n_2 - 2)}{n_1(n_2 - 2)^2(n_2 - 4)}, n_2 > 4$$

**Relationships**

- Relationship pair:  $F1(n_1, n_2) \rightarrow ChiSquared1(n)$
- Relationship type: Limiting
- 520 - Relationship definition: If  $X \sim F1(n_1, n_2)$ , the limiting distribution of  $n_1 X$  as  $n_2 \rightarrow \infty$  is the chi-square distribution with  $n_1$  degrees of freedom
- Relationship pair:  $ChiSquared1(n) \rightarrow F1(n_1, n_2)$
- Relationship type: Transformation
- Relationship definition: If  $X_1 \sim ChiSquared1(n_1), X_2 \sim ChiSquared1(n_2)$  are independent random variables
- 525  $\Rightarrow \frac{X_1/n_1}{X_2/n_2} \sim F1(n_1, n_2)$
- Relationship pair:  $Exponential2(1) \rightarrow F1(n_1, n_2)$
- Relationship type: Transformation
- Relationship definition: If  $X_1, X_2 \sim Exponential2(1)$  mutually independent and identically distributed random variables  $\Rightarrow X_1/X_2$  has the  $F1$  distribution
- 530 - Relationship pair:  $StudentT1(\nu) \rightarrow F1(n_1, n_2)$
- Relationship type: Transformation
- Relationship definition: If  $X \sim StudentT1(\nu) \Rightarrow Y = X^2 \sim F(1, \nu)$

**References**

- [Leemis and Mcqueston, 2008], [Forbes et al., 2011]
- 535 <http://www.math.wm.edu/~leemis/chart/UDR/PDFs/F.pdf>  
<http://www.uncertml.org/distributions/f>  
<http://www.math.wm.edu/~leemis/chart/UDR/PDFs/ChisquareF.pdf>  
<http://www.math.wm.edu/~leemis/chart/UDR/PDFs/FChisquare.pdf>  
<http://www.math.wm.edu/~leemis/chart/UDR/PDFs/ExponentialF.pdf>  
540 <http://www.math.wm.edu/~leemis/chart/UDR/PDFs/TF.pdf>

**Gamma1**

**name** Gamma 1 (ID: 0000571)  
**type** continuous  
**variate**  $x$ , scalar  
**support**  $x \in (0, +\infty)$

**Parameter: shape**

**name** shape  
**type** scalar  
**symbol**  $k$   
**definition**  $k > 0$

545 **Parameter: scale**

**name** scale  
**type** scalar  
**symbol**  $\theta$   
**definition**  $\theta > 0$

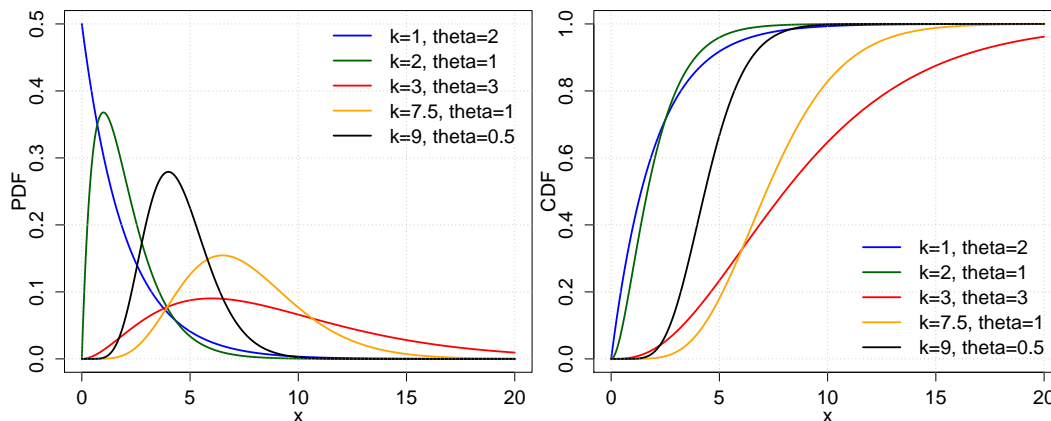

Figure 1.16: Gamma1 distribution plotted using the provided R code.

**Functions**

**PDF**

$$\frac{1}{\Gamma(k)\theta^k} x^{k-1} e^{-\frac{x}{\theta}}$$

**PDF in R**

```
1 / (gamma(k) * theta^k) * x^(k-1) * exp(-x/theta)
```

**CDF**

$$\frac{1}{\Gamma(k)} \gamma\left(k, \frac{x}{\theta}\right)$$

550 **CDF in R**

```
1/gamma(k) * Igamma(k,x/theta)
```

**Characteristics**

**Mean**

$$k\theta$$

**Median**

No simple closed form

**Mode**

$$(k - 1)\theta \text{ for } k \geq 1$$

**Variance**

$$k\theta^2$$

**Relationships**

- Relationship pair:  $Gamma1(k, \theta) \rightarrow Exponential1(\lambda)$
- 555 - Relationship type:
- Relationship definition:  $k = 1, \theta = 1/\lambda$
- Relationship pair:  $Gamma1(\alpha, \beta) \rightarrow InverseGamma1(\alpha, \beta)$
- Relationship type: Transformation
- Relationship definition: If  $X \sim Gamma1(\alpha, \beta)$  then  $X^{-1} \sim InverseGamma1(\alpha, \beta^{-1})$
- 560 - Relationship pair:  $Gamma1(k, \theta) \rightarrow Gamma2(r, \mu)$
- Relationship type: Reparameterisation
- Relationship definition:  $r = k, \mu = 1/\theta$
- Relationship pair:  $Gamma1(k, \theta) \rightarrow Beta1(\alpha, \beta)$
- Relationship type: Transformation
- 565 - Relationship definition:  $X1, X2 \sim Gamma1(k, \theta)$  and  $Y = X1/(X1 + X2) \Rightarrow Y \sim Beta1(\alpha, \beta)$

- Relationship pair:  $\text{Gamma1}(k, \theta) \rightarrow \text{Normal1}(\mu, \sigma)$
- Relationship type: Special case & Limiting
- Relationship definition:  $\mu = k\theta, \sigma^2 = k^2\theta, \theta \rightarrow \infty$
- Relationship pair:  $\text{Gamma1}(k, \theta) \rightarrow \text{Erlang1}(b, c)$
- 570 - Relationship type: Special case
- Relationship definition:  $k \in \mathbb{N}, k = c, \theta = b$
- Relationship pair:  $\text{Gamma1}(k, \theta) \rightarrow \text{ChiSquared1}(n)$
- Relationship type: Special case
- Relationship definition:  $k_{\text{ChiSquared1}} = 2k, \theta = 2$
- 575 - Relationship pair:  $\text{GeneralizedGamma2}(a, b, c, k) \rightarrow \text{Gamma1}(k, \theta)$
- Relationship type: Transformation
- Relationship definition:  $k = 1, a = 0$  and renaming parameters:  $c = k, b = \theta$
- Relationship pair:  $\text{GeneralizedGamma1}(a, d, p) \rightarrow \text{Gamma1}(k, \theta)$
- Relationship type: Special case
- 580 - Relationship definition:  $p = 1, k = d, \theta = a$
- Relationship pair:  $\text{Gamma2}(r, \mu) \rightarrow \text{Gamma1}(k, \theta)$
- Relationship type: Reparameterisation
- Relationship definition:  $k = r, \theta = 1/\mu$

## References

- 585 [Leemis and Mcqueston, 2008], [Forbes et al., 2011]  
[http://en.wikipedia.org/wiki/Gamma\\_distribution](http://en.wikipedia.org/wiki/Gamma_distribution)  
<http://www.uncertml.org/distributions/gamma>  
<http://www.math.wm.edu/~leemis/chart/UDR/PDFs/GammaBeta.pdf>  
<http://www.math.wm.edu/~leemis/chart/UDR/PDFs/GammaNormal1.pdf>  
 590 <http://www.math.wm.edu/~leemis/chart/UDR/PDFs/GammaErlang.pdf>  
<http://www.math.wm.edu/~leemis/chart/UDR/PDFs/GammaChisquareT.pdf>

## Gamma2

**name** Gamma 2 (ID: 0000597)  
**type** continuous  
**variate**  $x$ , scalar  
**support**  $x \in (0, +\infty)$

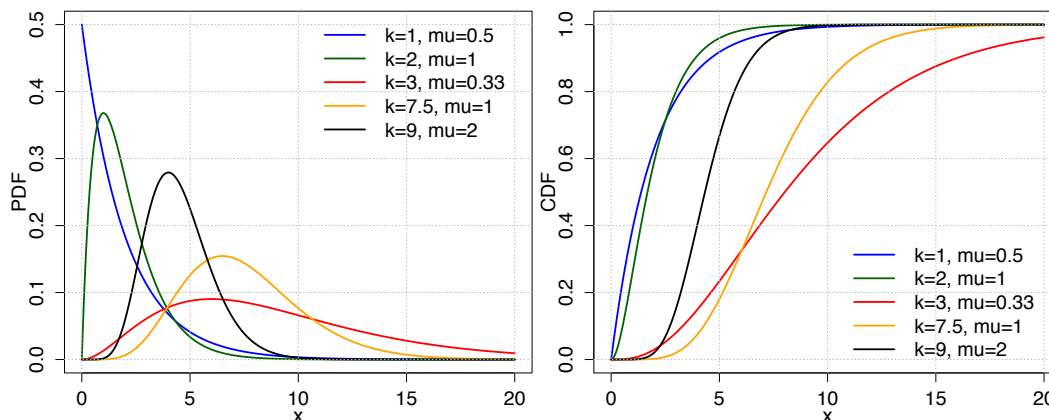

Figure 1.17: Gamma2 distribution plotted using the provided R code.

### Parameter: shape

**name** shape  
**type** scalar  
 595 **symbol**  $r$   
**definition**  $r > 0$

**Parameter: rate**

|                   |           |
|-------------------|-----------|
| <b>name</b>       | rate      |
| <b>type</b>       | scalar    |
| <b>symbol</b>     | $\mu$     |
| <b>definition</b> | $\mu > 0$ |

**Functions****PDF**

$$\frac{\mu^r x^{r-1} e^{-\mu x}}{\Gamma(r)}$$

**PDF in R**

600 `(mu^r * x^(r-1) * exp(-mu*x)) / gamma(r)`

**CDF**

$$\frac{1}{\Gamma(r)} \gamma(r, \mu x)$$

**CDF in R**

`1/gamma(r) * Igamma(r, mu*x, lower=T)`

**Characteristics****Mean**

$$r/\mu$$

**Variance**

$$r/\mu^2$$

**Relationships**

- 605 - Relationship pair:  $\text{Gamma2}(r, \mu) \rightarrow \text{Gamma1}(k, \theta)$   
 - Relationship type: Reparameterisation  
 - Relationship definition:  $k = r, \theta = 1/\mu$   
 - Relationship pair:  $\text{Gamma1}(k, \theta) \rightarrow \text{Gamma2}(r, \mu)$   
 - Relationship type: Reparameterisation  
 610 - Relationship definition:  $r = k, \mu = 1/\theta$

**References**

[Spiegelhalter et al., 2003]

**GeneralizedGamma1**

|                |                                   |
|----------------|-----------------------------------|
| <b>name</b>    | Generalized Gamma 1 (ID: 0000621) |
| <b>type</b>    | continuous                        |
| <b>variate</b> | $x$ , scalar                      |
| <b>support</b> | $x \in (0, +\infty)$              |

615 **Parameter: scale**

|                   |         |
|-------------------|---------|
| <b>name</b>       | scale   |
| <b>type</b>       | scalar  |
| <b>symbol</b>     | $a$     |
| <b>definition</b> | $a > 0$ |

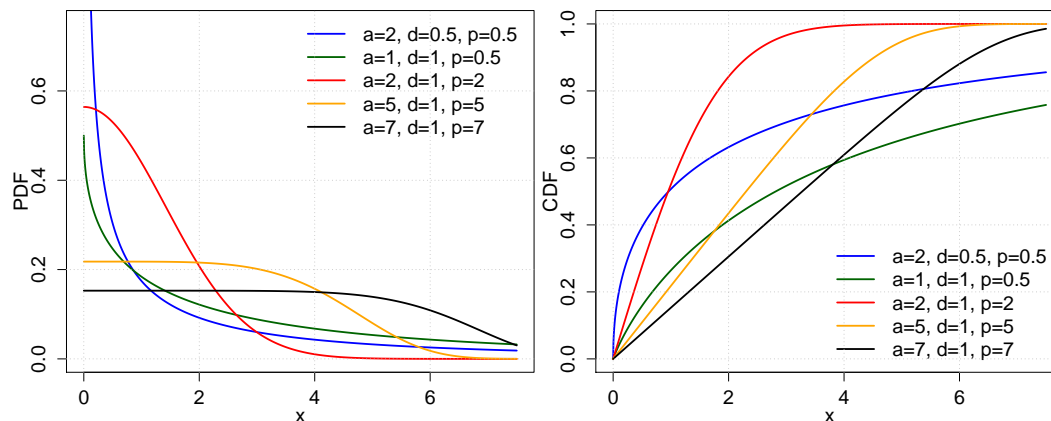

Figure 1.18: GeneralizedGamma1 distribution plotted using the provided R code.

**Parameter: shape1**

|                   |         |
|-------------------|---------|
| <b>name</b>       | shape   |
| <b>type</b>       | scalar  |
| <b>symbol</b>     | $d$     |
| <b>definition</b> | $d > 0$ |

**Parameter: shape2**

|                   |         |
|-------------------|---------|
| <b>name</b>       | shape   |
| <b>type</b>       | scalar  |
| <b>symbol</b>     | $p$     |
| <b>definition</b> | $p > 0$ |

**Functions****PDF**

$$\frac{p/a^d}{\Gamma(d/p)} x^{d-1} e^{-(x/a)^p}$$

**PDF in R**

```
p/a^d/gamma(d/p) * x^(d-1) * exp(-(x/a)^p)
```

**CDF**

$$\frac{\gamma(d/p, (x/a)^p)}{\Gamma(d/p)}$$

**CDF in R**

```
625 Igamma(d/p, (x/a)^p, lower=T) / gamma(d/p)
```

**Characteristics****Mean**

$$a \frac{\Gamma((d+1)/p)}{\Gamma(d/p)}$$

**Mode**

$$a \left( \frac{d-1}{p} \right)^{\frac{1}{p}}, \text{ for } d > 1$$

**Variance**

$$a^2 \left( \frac{\Gamma((d+2)/p)}{\Gamma(d/p)} - \left( \frac{\Gamma((d+1)/p)}{\Gamma(d/p)} \right)^2 \right)$$



**Relationships**

- Relationship pair:  $GeneralizedGamma1(a, d, p) \rightarrow Gamma1(k, \theta)$
- Relationship type: Special case
- 630 - Relationship definition:  $p = 1, k = d, \theta = a$
- Relationship pair:  $GeneralizedGamma1(a, d, p) \rightarrow GeneralizedGamma3(r, \mu, \beta)$
- Relationship type: Reparameterisation
- Relationship definition:  $r = d/p, \beta = p, \mu = 1/a$
- Relationship pair:  $GeneralizedGamma3(r, \mu, \beta) \rightarrow GeneralizedGamma1(a, d, p)$
- 635 - Relationship type: Reparameterisation
- Relationship definition:  $a = 1/\mu, d = \beta r, p = \beta$
- Relationship pair:  $GeneralizedGamma2(a, b, c) \rightarrow GeneralizedGamma1(a, d, p)$
- Relationship type: Reparameterisation
- Relationship definition:  $a = 0, kc = d$ , and rename  $k = p, b = a$

640 **References**

[Stacy, 1962]  
[http://en.wikipedia.org/wiki/Generalized\\_gamma\\_distribution](http://en.wikipedia.org/wiki/Generalized_gamma_distribution)

**GeneralizedGamma2**

**name**            Generalized Gamma 2 (ID: 0000644)  
**type**            continuous  
**variate**         $x$ , scalar  
**support**         $0 < a < x$

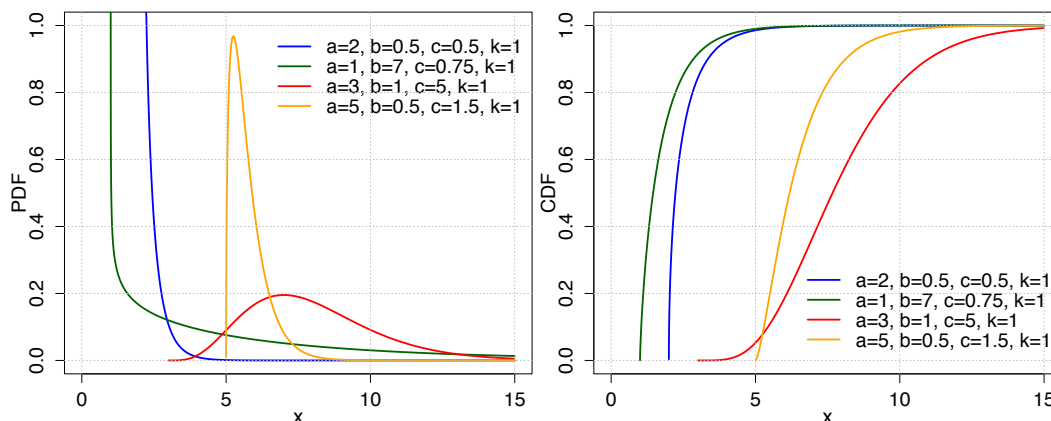

Figure 1.19: GeneralizedGamma2 distribution plotted using the provided R code.

645 **Parameter: location**

**name**            location  
**type**            scalar  
**symbol**         $a$   
**definition**     $a > 0$

**Parameter: scale**

**name**            scale  
**type**            scalar  
**symbol**         $b$   
**definition**     $b > 0$

**Parameter: shape1**

|                   |         |
|-------------------|---------|
| <b>name</b>       | shape1  |
| <b>type</b>       | scalar  |
| <b>symbol</b>     | $c$     |
| <b>definition</b> | $c > 0$ |

**Parameter: shape2**

|                   |         |
|-------------------|---------|
| <b>name</b>       | shape2  |
| <b>type</b>       | scalar  |
| <b>symbol</b>     | $k$     |
| <b>definition</b> | $k > 0$ |

**Functions****PDF**

$$\frac{k(x-a)^{kc-1}}{b^{kc}\Gamma(c)} \exp\left[-\left(\frac{x-a}{b}\right)^k\right]$$

**PDF in R**

655  $(k*(x-a)^(k*c-1)) / (b^(k*c)*gamma(c)) * \exp(-((x-a)/b)^k)$

**CDF**

$$\frac{\gamma(c, (\frac{x-a}{b})^k)}{\Gamma(c)}$$

**CDF in R**

$Igamma(c, ((x-a)/b)^k, lower=T) / gamma(c)$

**Characteristics****Mean**

$$a + b\Gamma(c + 1/k)/\Gamma(c)$$

**Mode**

$$a + b(c - 1/k)^{1/k}, c > 1/k$$

**Variance**

$$b^2\{\Gamma(c + 2/k)/\Gamma(c) - [\Gamma(c + 1/k)/\Gamma(c)]^2\}$$

**Relationships**

- 660 - Relationship pair:  $GeneralizedGamma2(a, b, c, k) \rightarrow Gamma1(k, \theta)$   
 - Relationship type: Transformation  
 - Relationship definition:  $k = 1, a = 0$  and renaming parameters:  $c = k, b = \theta$   
 - Relationship pair:  $GeneralizedGamma2(a, b, c, k) \rightarrow Exponential1(\lambda)$   
 - Relationship type: Special case & Reparameterisation  
 665 - Relationship definition:  $k = c = 1, a = 0, b = 1/\lambda$   
 - Relationship pair:  $GeneralizedGamma2(a, b, c, k) \rightarrow Weibull1(\lambda, k)$   
 - Relationship type: Special case & Reparameterisation  
 - Relationship definition:  $c = 1, a = 0, b = \lambda$   
 - Relationship pair:  $GeneralizedGamma2(a, b, c, k) \rightarrow ChiSquared1(k)$   
 670 - Relationship type: Special case & Reparameterisation  
 - Relationship definition:  $a = 0, b = 2, c = k_{ChiSquare1}/2, k = 1$   
 - Relationship pair:  $GeneralizedGamma2(a, b, c) \rightarrow GeneralizedGamma1(a, d, p)$   
 - Relationship type: Reparameterisation  
 - Relationship definition:  $a = 0, kc = d$ , and rename  $k = p, b = a$

675 **References**

[Forbes et al., 2011]

[http://www.mathwave.com/help/easyfit/html/analyses/distributions/gen\\_gamma.html](http://www.mathwave.com/help/easyfit/html/analyses/distributions/gen_gamma.html)**GeneralizedGamma3**

**name** Generalized Gamma 3 (ID: 0000670)  
**type** continuous  
**variate**  $x$ , scalar  
**support**  $x \in (0, +\infty)$

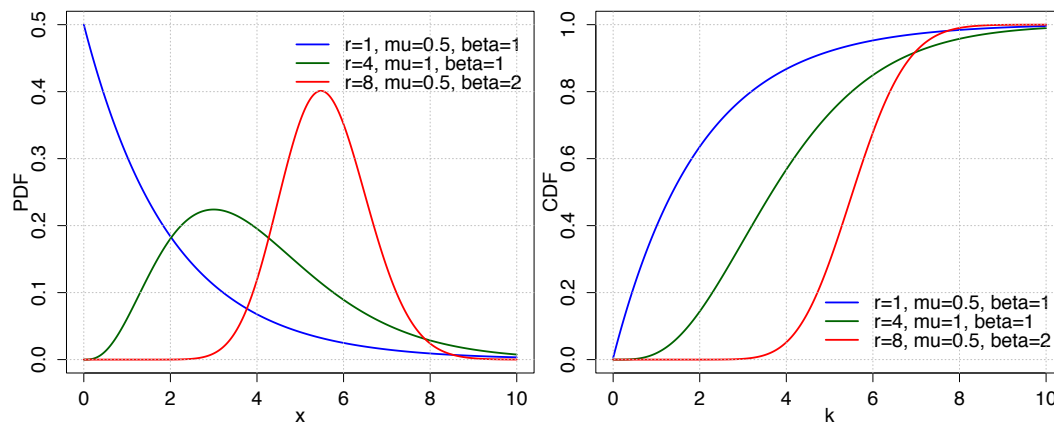

Figure 1.20: GeneralizedGamma3 distribution plotted using the provided R code.

680 **Parameter: scale**

**name** scale  
**type** scalar  
**symbol**  $r$   
**definition**  $r > 0$

**Parameter: shape1**

**name** shape  
**type** scalar  
**symbol**  $\mu$   
**definition**  $\mu > 0$

**Parameter: shape2**

**name** shape  
**type** scalar  
**symbol**  $\beta$   
**definition**  $\beta > 0$

685

**Functions****PDF**

$$\frac{\beta}{\Gamma(r)} \mu^{\beta r} x^{\beta r - 1} \exp[-(\mu x)^\beta]$$

**PDF in R**

```
beta / gamma(r) * mu^(beta*r) * x^(beta*r - 1) * exp(-(mu*x)^beta)
```

**Relationships**

- 690 - Relationship pair:  $GeneralizedGamma3(r, \mu, \beta) \rightarrow GeneralizedGamma1(a, d, p)$   
 - Relationship type: Reparameterisation  
 - Relationship definition:  $a = 1/\mu, d = \beta r, p = \beta$   
 - Relationship pair:  $GeneralizedGamma1(a, d, p) \rightarrow GeneralizedGamma3(r, \mu, \beta)$   
 - Relationship type: Reparameterisation  
 695 - Relationship definition:  $r = d/p, \beta = p, \mu = 1/a$

**References**

[Spiegelhalter et al., 2003]

**GeneralizedNegativeBinomial1**

**name** Generalized Negative Binomial 1 (ID: 0000690)  
**type** discrete  
**variate**  $x$ , scalar  
**support**  $x \in \{0, 1, 2, 3, \dots\}$

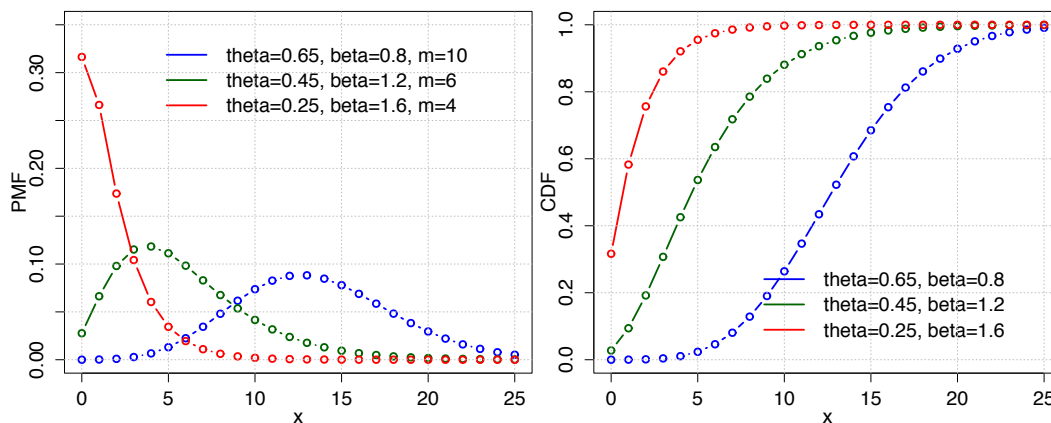

Figure 1.21: GeneralizedNegativeBinomial1 distribution plotted using the provided R code.

**700 Parameter: theta**

**name** scale  
**type** scalar  
**symbol**  $\theta$   
**definition**  $0 < \theta < 1$

**Parameter: beta**

**name** shape1  
**type** scalar  
**symbol**  $\beta$   
**definition**  $\beta = 0$  or  $1 \leq \beta \leq \theta^{-1}$

**Parameter: m**

**name** shape2  
**type** scalar  
**symbol**  $m$   
**definition**  $m > 0$   
 705

**Functions**

**PMF**

$$\frac{m}{m + \beta x} \binom{m + \beta x}{x} \theta^x (1 - \theta)^{m + \beta x - x}$$

**PMF in R**

`m/(m+beta*x) * choose(m+beta*x,x)*theta^x * (1-theta)^(m+beta*x-x)`

**CDF**

$$\sum_{i=1}^x f(i), x \in \{0, 1, 2, \dots\} \text{ with } f \text{ the PMF}$$

**CDF in R**

710 `cumsum(PMF)`

**Characteristics**

**Mean**

$$m\theta(1 - \theta\beta)^{-1}$$

**Variance**

$$m\theta(1 - \theta)(1 - \theta\beta)^{-3}$$

**Relationships**

- Relationship pair: *GeneralizedNegativeBinomial1*( $\theta, \beta, m$ )  $\rightarrow$  *Binomial1*( $n, p$ )
- Relationship type: Special case & Reparameterisation
- 715 - Relationship definition:  $\beta = 0$  and set  $m = n, \theta = p$
- Relationship pair: *GeneralizedNegativeBinomial1*( $\theta, \beta, m$ )  $\rightarrow$  *NegativeBinomial4*( $r, p$ )
- Relationship type: Special case & Reparameterisation
- Relationship definition:  $\beta = 1$  and set  $m = r, \theta = p$
- Relationship pair: *GeneralizedNegativeBinomial1*( $\theta, \beta, m$ )  $\rightarrow$  *InverseBinomial1*( $k, p$ )
- 720 - Relationship type: Special case & Reparameterisation
- Relationship definition:  $\beta = 2, \theta = 1 - p$

**References**

[Consul and Famoye, 2006], [Yanagimoto, 1989]

**GeneralizedPoisson1**

725 **name** Generalized Poisson 1 (ID: 0000712)  
**type** discrete  
**variate**  $k$ , scalar  
**support**  $k \in \{0, 1, 2, 3, \dots\}$

**Parameter: rate**

**name** Poisson intensity  
**type** scalar  
**symbol**  $\theta$   
**definition**  $\theta > 0$

**Parameter: dispersion**

**name** dispersion  
**type** scalar  
**symbol**  $\delta$   
**definition**  $\max(-1, -\theta/m) < \delta < 1$  with  $m(\geq 4)$  the largest positive integer for which  $\theta + m\delta > 0$  when  $\delta < 0$

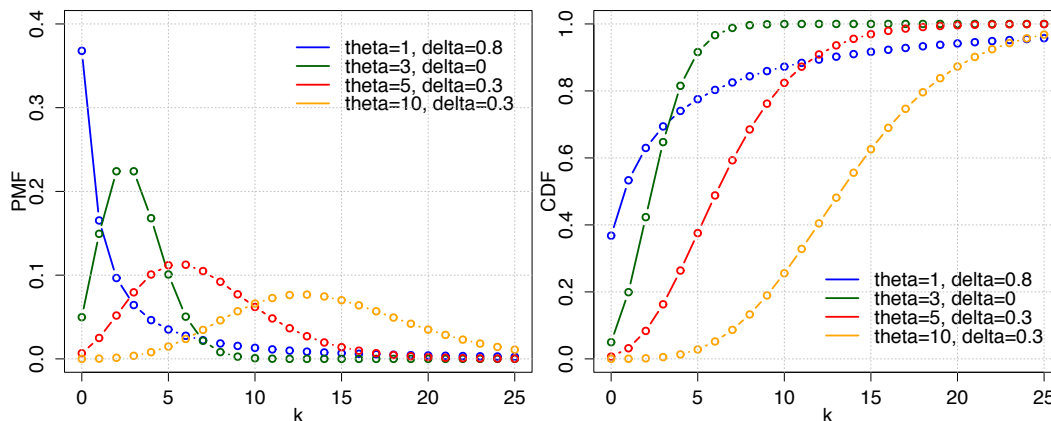

Figure 1.22: GeneralizedPoisson1 distribution plotted using the provided R code.

730 **Functions**

**PMF**

$$\frac{\theta(\theta + \delta k)^{k-1} \times e^{-\theta - \delta k}}{k!}$$

**PMF in R**

```
(theta*(theta+k*delta)^(k-1) * exp(-theta-k*delta)) / factorial(k)
```

**CDF**

$$\sum_{i=1}^x f(i), x \in \{0, 1, 2, \dots\}$$
 with  $f$  the PMF

**CDF in R**

```
cumsum(PMF)
```

735 **Characteristics**

**Mean**

$$\frac{\theta}{1 - \delta}$$

**Variance**

$$\frac{\theta}{(1 - \delta)^3}$$

**Relationships**

- Relationship pair:  $GeneralizedPoisson1(\theta, \delta) \rightarrow Poisson1(\lambda)$
- Relationship type: Special case
- Relationship definition:  $\delta = 0, \theta = \mu$
- 740 - Relationship pair:  $GeneralizedPoisson1(\theta, \delta) \rightarrow GeneralizedPoisson2(\mu, \delta)$
- Relationship type: Reparameterisation
- Relationship definition:  $\mu = \theta / (1 - \delta)$
- Relationship pair:  $GeneralizedPoisson2(\mu, \delta) \rightarrow GeneralizedPoisson1(\theta, \delta)$
- Relationship type: Reparameterisation
- 745 - Relationship definition:  $\theta = \mu(1 - \delta)$

**References**

[Yang et al., 2007], [Consul and Famoye, 2006]  
<http://finzi.psych.upenn.edu/library/VGAM/html/genpoisson.html>

# GeneralizedPoisson3

750 **name** Generalized Poisson 3 (ID: 0000758)  
**type** discrete  
**variate**  $y$ , scalar  
**support**  $y \in \{0, 1, 2, 3, \dots\}$

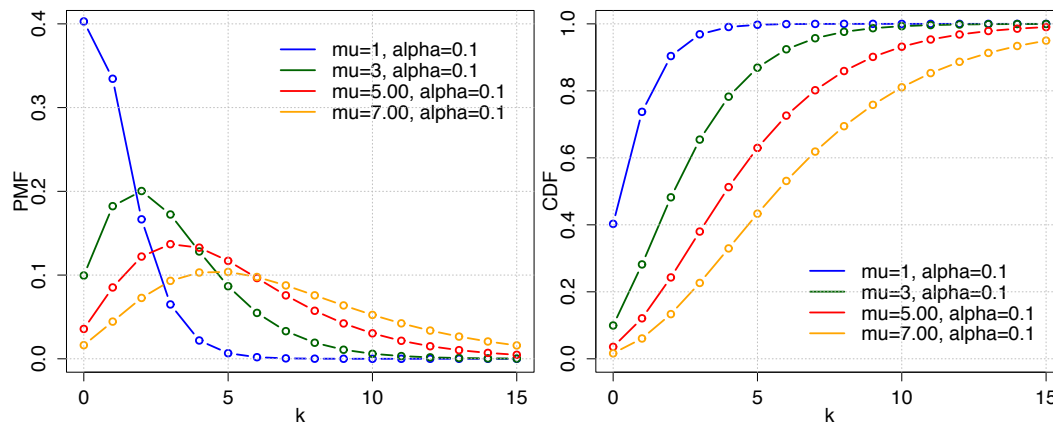

Figure 1.23: GeneralizedPoisson3 distribution plotted using the provided R code.

## Parameter: mean

**name** mean  
**type** scalar  
**symbol**  $\mu$   
**definition**  $\mu > 0$

## Parameter: dispersion

**name** dispersion  
**type** scalar  
**symbol**  $\alpha$   
**definition**  $\alpha > -1, \alpha \in R$

755 **Functions**

### PMF

$$\left(\frac{\mu}{1+\alpha\mu}\right)^y \frac{(1+\alpha y)^{y-1}}{y!} \exp\left[\frac{-\mu(1+\alpha y)}{1+\alpha\mu}\right]$$

### PMF in R

`(mu/(1+alpha*mu))^y *(1+alpha*y)^(y-1)/factorial(y)*exp(-mu*(1+alpha*y)/(1+alpha*mu))`

### CDF

$$\sum_{i=1}^x f(i), x \in \{0, 1, 2, \dots\} \text{ with } f \text{ the PMF}$$

### CDF in R

`cumsum(PMF)`

760 **Characteristics**

### Mean

$$\mu$$

### Variance

$$\mu(1+\alpha\mu)^2$$

**Relationships**

- Relationship pair:  $GeneralizedPoisson3(\mu, \alpha) \rightarrow Poisson1(\lambda)$
- Relationship type: Special case
- Relationship definition:  $\alpha = 0, \lambda = \mu$
- 765 - Relationship pair:  $ZeroInflatedGeneralizedPoisson1(\mu, \alpha, p0) \rightarrow GeneralizedPoisson3(\mu, \alpha)$
- Relationship type: Special case
- Relationship definition:  $p0 = 0$

**References**

[Hilbe, 2011], [Famoye and Singh, 2006], [Ismail and Zamani, 2013]

770 **GeneralizedPoisson2**

**name** GeneralizedPoisson2 (ID: 0000735)  
**type** discrete  
**variate**  $k$ , scalar  
**support**  $k \in \{0, 1, 2, 3, \dots\}$

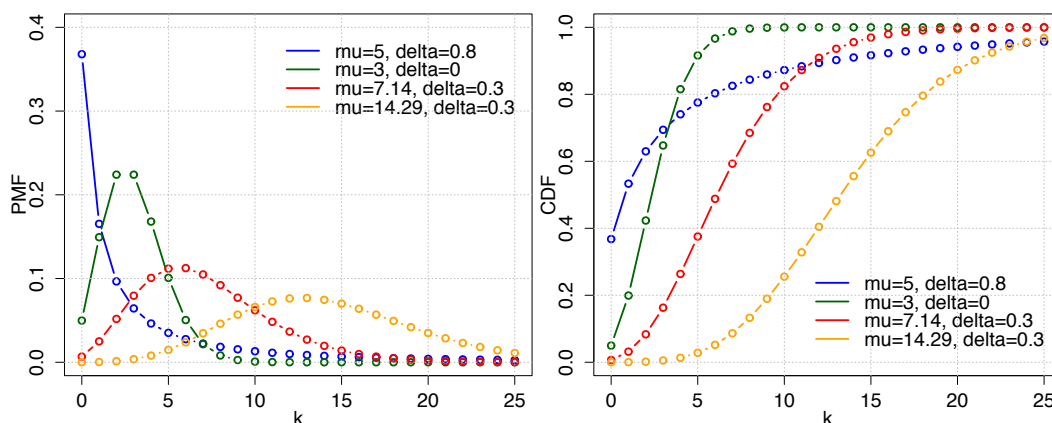

Figure 1.24: GeneralizedPoisson2 distribution plotted using the provided R code.

**Parameter: mean**

**name** mean  
**type** scalar  
**symbol**  $\mu$   
**definition**  $\mu > 0$

**Parameter: dispersion**

775 **name** dispersion  
**type** scalar  
**symbol**  $\delta$   
**definition**  $max(-1, -\mu/m) < \delta < 1$  with  $m(\geq 4)$  the largest positive integer for which  $\mu + m\delta > 0$ .

**Functions**

**PMF**

$$\frac{\mu(1 - \delta)[\mu(1 - \delta) + \delta k]^{k-1}}{k!} e^{-[\mu(1-\delta)+\delta k]}$$

**PMF in R**

`-(mu*(1-delta)*(mu*(1-delta)+delta*k)^(k-1)) / factorial(k) * exp(-[mu*(1-delta)+delta*k])`



**CDF**

$$\sum_{i=1}^x f(i), x \in \{0, 1, 2, \dots\}$$
 with  $f$  the PMF

**CDF in R**

780 cumsum(PMF)

**Characteristics**

**Mean**

$$\mu$$

**Variance**

$$\frac{\mu}{(1 - \delta)^2}$$

**Relationships**

- Relationship pair: *GeneralizedPoisson2*( $\mu, \delta$ )  $\rightarrow$  *Poisson1*( $\lambda$ )
- Relationship type: Special case
- 785 - Relationship definition:  $\delta = 0, \lambda = \mu$
- Relationship pair: *GeneralizedPoisson2*( $\mu, \delta$ )  $\rightarrow$  *GeneralizedPoisson1*( $\theta, \delta$ )
- Relationship type: Reparameterisation
- Relationship definition:  $\theta = \mu(1 - \delta)$
- Relationship pair: *GeneralizedPoisson1*( $\theta, \delta$ )  $\rightarrow$  *GeneralizedPoisson2*( $\mu, \delta$ )
- 790 - Relationship type: Reparameterisation
- Relationship definition:  $\mu = \theta / (1 - \delta)$

**References**

[Plan, 2014], [Yang et al., 2007]

**Geometric1**

795 **name** Geometric 1 (ID: 0000782)  
**type** discrete  
**variate**  $k$ , scalar  
**support**  $k \in \{0, 1, 2, 3, \dots\}$ , number of failures

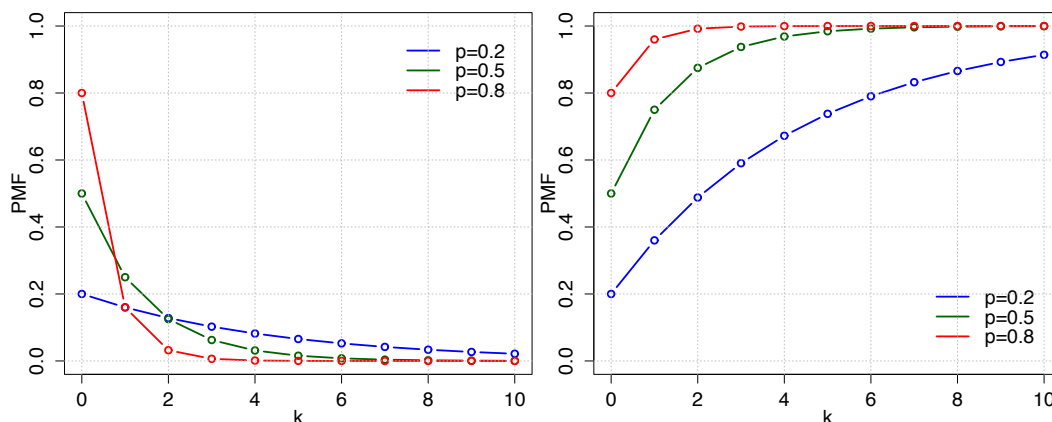

Figure 1.25: Geometric1 distribution plotted using the provided R code.

**Model**

The geometric distribution is the probability distribution of the number  $Y = X - 1$  of failures before the first success, supported on the set  $\{0, 1, 2, 3, \dots\}$ .

**Parameter: probability**

|                   |                     |
|-------------------|---------------------|
| <b>name</b>       | success probability |
| <b>type</b>       | scalar              |
| <b>symbol</b>     | $p$                 |
| <b>definition</b> | $0 < p < 1$         |

**Functions****PMF**

$$(1 - p)^k p$$

**PMF in R**

$p * (1 - p) ^ k$

**CDF**

$$1 - (1 - p)^{k+1}$$

**CDF in R**

$1 - (1 - p) ^ (k+1)$

**Characteristics****Mean**

$$\frac{1 - p}{p}$$

**Median**

$$\left\lceil \frac{-1}{\log_2(1 - p)} - 1 \right\rceil \quad (\text{not unique if } -1/\log_2(1 - p) - 1 \text{ is an integer})$$

**Mode**

$$0$$

**Variance**

$$\frac{1 - p}{p^2}$$

**Relationships**

- Relationship pair:  $Geometric1(p) \rightarrow NegativeBinomial1(r, p)$
- Relationship type: Transformation
- Relationship definition:  $\Sigma X(iid)$
- Relationship pair:  $NegativeBinomial1(r, p) \rightarrow Geometric1(p)$
- Relationship type: Special case
- Relationship definition:  $n = 1$

**References**

- [Leemis and Mcqueston, 2008]
- [http://en.wikipedia.org/wiki/Geometric\\_distribution](http://en.wikipedia.org/wiki/Geometric_distribution)
- <http://www.uncertml.org/distributions/geometric>
- <http://www.math.wm.edu/~leemis/chart/UDR/PDFs/PascalGeometric.pdf>
- <http://www.math.wm.edu/~leemis/chart/UDR/PDFs/GeometricPascal.pdf>

**Gompertz1**

|                |                            |
|----------------|----------------------------|
| <b>name</b>    | Gompertz 1 (ID: 0000008)   |
| <b>type</b>    | continuous                 |
| <b>variate</b> | $x$ , scalar               |
| <b>support</b> | $x \in (-\infty, +\infty)$ |

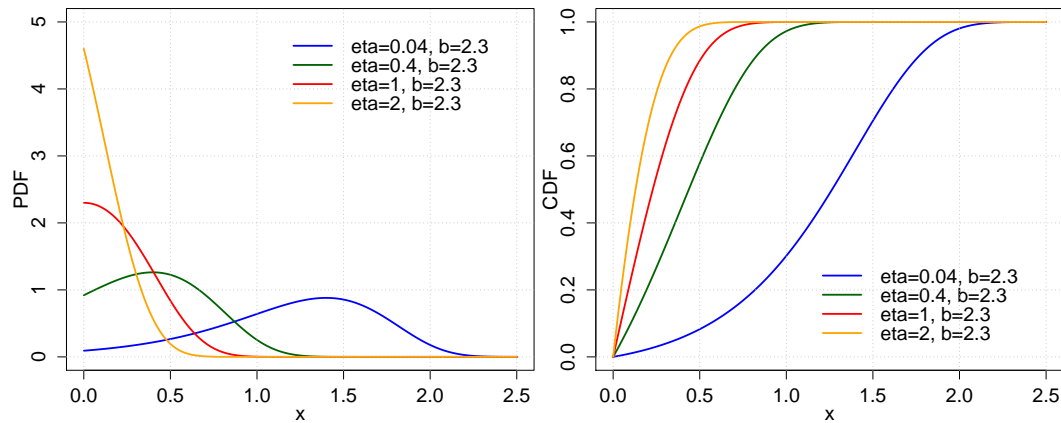

Figure 1.26: Gompertz1 distribution plotted using the provided R code.

**Parameter: shape**

|                   |            |
|-------------------|------------|
| <b>name</b>       | shape      |
| <b>type</b>       | scalar     |
| <b>symbol</b>     | $\eta$     |
| <b>definition</b> | $\eta > 0$ |

**Parameter: scale**

|                   |         |
|-------------------|---------|
| <b>name</b>       | scale   |
| <b>type</b>       | scalar  |
| <b>symbol</b>     | $b$     |
| <b>definition</b> | $b > 0$ |

**Functions****PDF**

$$b\eta e^{bx} e^{\eta} \exp(-\eta e^{bx})$$

**PDF in R**

```
b*eta*exp(b*x)*exp(eta)*exp(-eta*exp(b*x))
```

**CDF**

$$1 - \exp(-\eta(e^{bx} - 1))$$

**CDF in R**

```
1-exp(-eta*(exp(b*x)-1))
```

**Characteristics****Median**

$$(1/b) \log [(-1/\eta) \log (1/2) + 1]$$

**Rerferences**

[https://en.wikipedia.org/wiki/Gompertz\\_distribution](https://en.wikipedia.org/wiki/Gompertz_distribution)

**Gumbel1**

|                |                            |
|----------------|----------------------------|
| <b>name</b>    | Gumbel 1 (ID: 0000032)     |
| <b>type</b>    | continuous                 |
| <b>variate</b> | $x$ , scalar               |
| <b>support</b> | $x \in (-\infty, +\infty)$ |

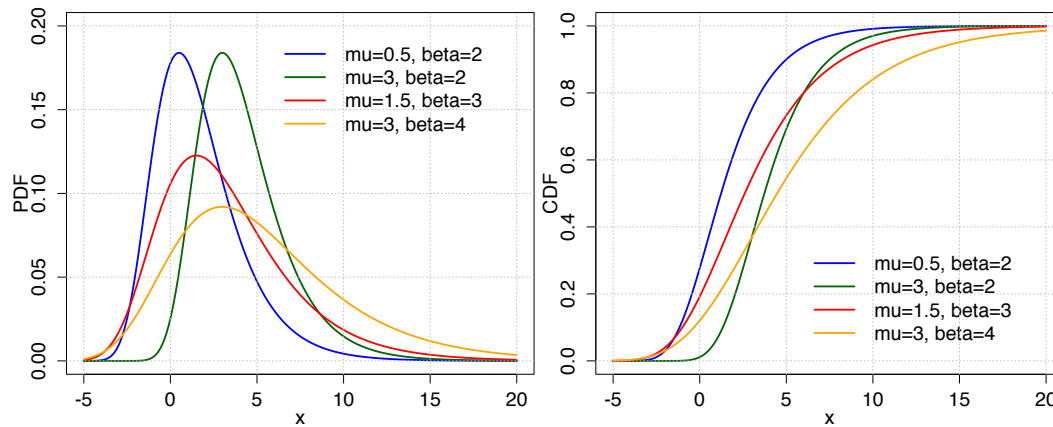

Figure 1.27: Gumbel1 distribution plotted using the provided R code.

**Parameter: location**

|            |             |
|------------|-------------|
| name       | location    |
| type       | scalar      |
| symbol     | $\mu$       |
| definition | $\mu \in R$ |

**Parameter: scale**

|            |                          |
|------------|--------------------------|
| name       | scale                    |
| type       | scalar                   |
| symbol     | $\beta$                  |
| definition | $\beta > 0, \beta \in R$ |

840 **Functions****PDF**

$$\frac{e^{-e^{-\frac{x-\mu}{\beta}}} e^{-\frac{x-\mu}{\beta}}}{\beta}$$

**PDF in R**

```
(exp(-exp(-(x-mu)/beta)) * exp(-(x-mu)/beta))/beta
```

**CDF**

$$e^{-e^{-(x-\mu)/\beta}}$$

**CDF in R**

```
exp(-exp(-(x-mu)/beta))
```

845 **Characteristics****Mean**

$$\mu + \beta \gamma_E; \text{ with is Euler constant } \gamma_E$$

**Median**

$$\mu - \beta \ln(\ln(2))$$

**Mode**

$$\mu$$

**Variance**

$$\frac{\pi^2}{6} \beta^2$$

## References

[https://en.wikipedia.org/wiki/Gumbel\\_distribution](https://en.wikipedia.org/wiki/Gumbel_distribution)

## HalfNormal1

**name** Half-normal 1 (ID: 0000068)  
**type** continuous  
**variate**  $x$ , scalar  
**support**  $x \in [0, +\infty)$

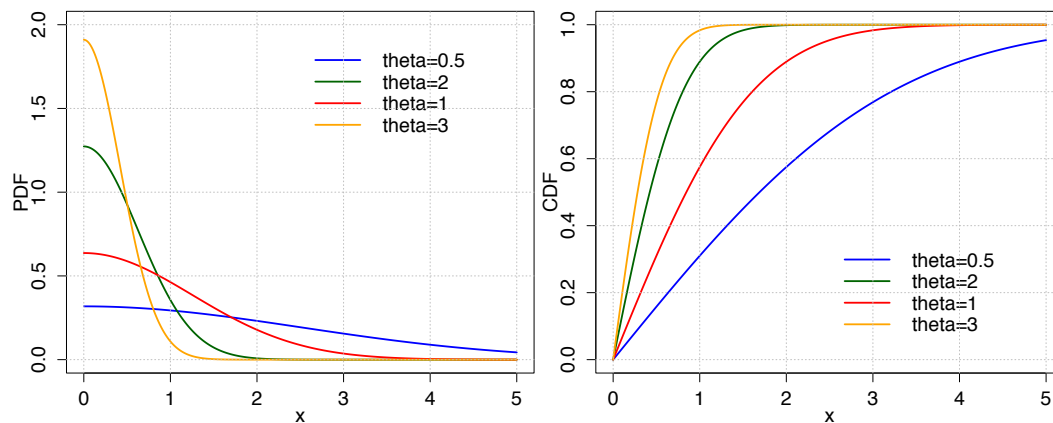

Figure 1.28: HalfNormal1 distribution plotted using the provided R code.

850 **Parameter: inverseScale**

**name** inverse scale  
**type** scalar  
**symbol**  $\theta$   
**definition**  $\theta > 0$

**Functions**

**PDF**

$$\frac{2\theta}{\pi} e^{-\theta^2 x^2 / \pi}$$

**PDF in R**

`2*theta/pi * exp(-theta^2 * x^2 / pi)`

**CDF**

$$\text{erf}(\theta x / \sqrt{\pi})$$

855 **CDF in R**

`erf(theta * x / sqrt(pi))`

**Characteristics**

**Mean**

$$1/\theta$$

**Variance**

$$\frac{\pi - 2}{2\theta^2}$$

**Relationships**

- Relationship pair:  $TruncatedNormal1(\mu, \sigma, a, b) \rightarrow HalfNormal1(\theta)$
- 860 - Relationship type: Special case
- Relationship definition:  $\mu = 0, a = 0, b = \infty$

**References**

- [Forbes et al., 2011]  
<http://reference.wolfram.com/language/ref/HalfNormalDistribution.html>  
 865 <http://mathworld.wolfram.com/Half-NormalDistribution.html>

**Hypergeometric1**

**name** Hypergeometric 1 (ID: 0000126)  
**type** discrete  
**variate**  $k$ , scalar  
**support**  $k \in \{\max(0, n + K - N), \dots, \min(n, K)\}$

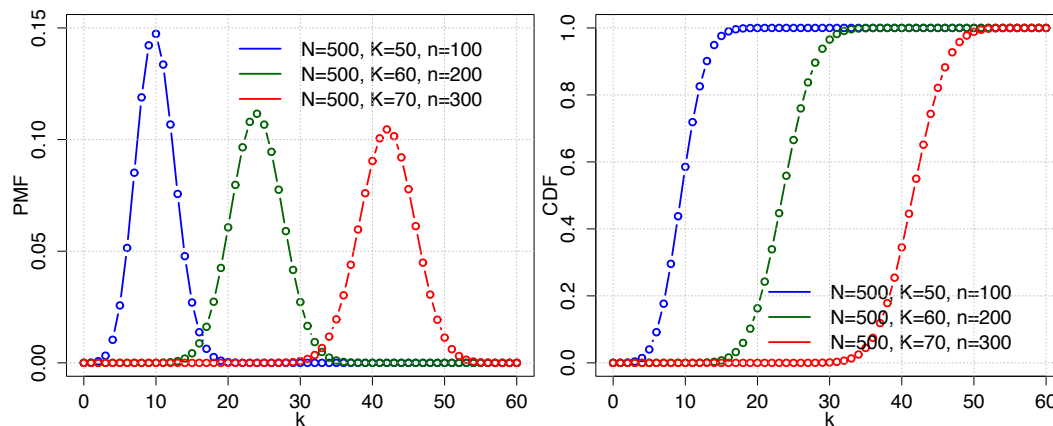

Figure 1.29: Hypergeometric1 distribution plotted using the provided R code.

**Model**

- 870 Hypergeometric distribution is a discrete probability distribution that describes the probability of  $k$  successes in  $n$  draws, without replacement, from a finite population of size  $N$  that contains exactly  $K$  successes, wherein each draw is either a success or a failure. In contrast, the binomial distribution describes the probability of  $k$  successes in  $n$  draws with replacement.

**Parameter: populationSize**

**name** population size  
**type** scalar  
**symbol**  $N$   
**definition**  $N \in \{0, 1, 2, \dots\}$

875 **Parameter: numberOfSuccesses**

**name** number of successes  
**type** scalar  
**symbol**  $K$   
**definition**  $K \in \{0, 1, 2, \dots, N\}$

**Parameter: numberOfTrials**

|                   |                               |
|-------------------|-------------------------------|
| <b>name</b>       | number of trials              |
| <b>type</b>       | scalar                        |
| <b>symbol</b>     | $n$                           |
| <b>definition</b> | $n \in \{0, 1, 2, \dots, N\}$ |

**Functions****PMF**

$$\frac{\binom{K}{k} \binom{N-K}{n-k}}{\binom{N}{n}}$$

880 **PMF in R**

choose(K, k) \* choose(M-K, n-k) / choose(M, n)

**CDF**

$$1 - \frac{\binom{n}{k+1} \binom{N-n}{K-k-1}}{\binom{N}{K}} {}_3F_2 \left[ \begin{matrix} 1, k+1-K, k+1-n \\ k+2, N+k+2-K-n \end{matrix} ; 1 \right]$$

**CDF in R**

cumsum(PMF)

**Characteristics****Mean**

$$n \frac{K}{N}$$

**Mode**

$$\left\lfloor \frac{(n+1)(K+1)}{N+2} \right\rfloor$$

**Variance**

$$n \frac{K}{N} \frac{(N-K)}{N} \frac{N-n}{N-1}$$

885 **Relationships**

- Relationship pair:  $Hypergeometric1(N, K, n) \rightarrow Binomial1(n, p)$
- Relationship type:
- Relationship definition:  $p = K/N, n = n, N \rightarrow \infty$
- Relationship pair:  $Hypergeometric1(N, K, n) \rightarrow Poisson1(\lambda)$
- 890 - Relationship type: Limiting
- Relationship definition:  $X \sim Hypergeometric1(N, K, n) \Rightarrow Y \sim Poisson1(\lambda)$  as  $K, N$  and  $n$  tend to infinity for  $K/N$  small and  $nK/N \rightarrow \lambda$
- Relationship pair:  $Hypergeometric1(N, K, n) \rightarrow Normal1(\mu, \sigma)$
- Relationship type: Limiting
- 895 - Relationship definition:  $X \sim Hypergeometric1(N, K, n) \Rightarrow Y \sim Normal1(\mu, \sigma)$  for large  $n$ , but  $K/N$  not too small

**References**

- [Forbes et al., 2011], [Leemis and Mcqueston, 2008]  
[http://en.wikipedia.org/wiki/Hypergeometric\\_distribution](http://en.wikipedia.org/wiki/Hypergeometric_distribution)  
<http://www.uncertml.org/distributions/hypergeometric>  
 900 <http://www.math.wm.edu/~leemis/chart/UDR/PDFs/HypergeometricBinomial.pdf>

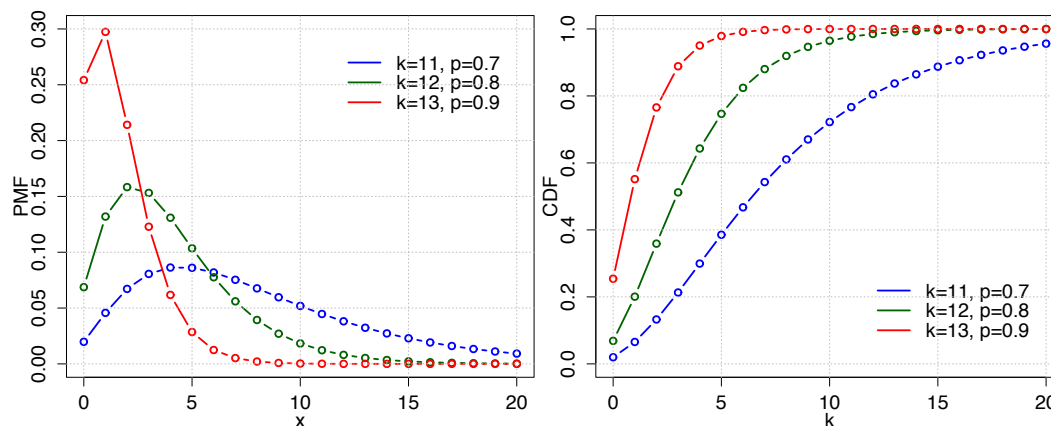

Figure 1.30: InverseBinomial1 distribution plotted using the provided R code.

## InverseBinomial1

**name** Inverse Binomial 1 (ID: 0000154)  
**type** discrete  
**variate**  $x$ , scalar  
**support**  $x \in \{0, 1, 2, 3, \dots\}$

### Parameter: index

**name** index parameter  
**type** scalar  
**symbol**  $k$   
**definition**  $k \in \{0, 1, 2, \dots\}$

### 905 Parameter: probability

**name** probability  
**type** scalar  
**symbol**  $p$   
**definition**  $1/2 < p < 1$

### Functions

#### PMF

$$\frac{k \Gamma(2x + k)}{\Gamma(x + 1) \Gamma(x + k + 1)} p^{k+x} (1-p)^x$$

#### PMF in R

`(k * gamma(2*x+k)) / (gamma(x+1) * gamma(x+k+1)) * p^(x+k) * (1-p)^x`

### 910 Characteristics

#### Mean

$$k(1-p)/(2p-1)$$

#### Variance

$$kp(1-p)/(2p-1)^3$$

### Relationships

- Relationship pair:  $GeneralizedNegativeBinomial1(\theta, \beta, m) \rightarrow InverseBinomial1(k, p)$
- Relationship type:
- Relationship definition:  $\beta = 2, \theta = 1 - p$



915 **References**

[Yanagimoto, 1989]

<https://cran.r-project.org/web/packages/VGAM/VGAM.pdf>**InverseGamma1**

**name** Inverse-Gamma 1 (ID: 0000182)  
**type** continuous  
**variate**  $x$ , scalar  
**support**  $x \in (0, +\infty)$

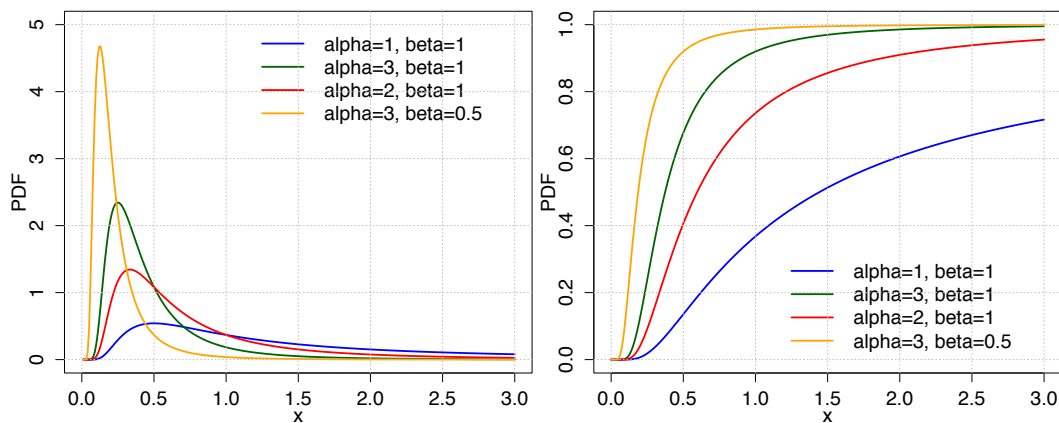

Figure 1.31: InverseGamma1 distribution plotted using the provided R code.

920 **Parameter: shape**

**name** shape  
**type** scalar  
**symbol**  $\alpha$   
**definition**  $\alpha > 0, \alpha \in R$

**Parameter: scale**

**name** scale  
**type** scalar  
**symbol**  $\beta$   
**definition**  $\beta > 0, \beta \in R$

**Functions****PDF**

$$\frac{\beta^\alpha}{\Gamma(\alpha)} x^{-\alpha-1} \exp\left(-\frac{\beta}{x}\right)$$

925 **PDF in R**

```
beta^alpha/gamma(alpha) * x^(-alpha-1) * exp(-beta/x)
```

**CDF**

$$\frac{\Gamma(\alpha, \beta/x)}{\Gamma(\alpha)}$$

**CDF in R**

```
Igamma(alpha, beta/x, lower=F) / gamma(alpha)
```

**Characteristics****Mean**

$$\frac{\beta}{\alpha - 1} \text{ for } \alpha > 1$$

**Mode**

$$\frac{\beta}{\alpha + 1}$$

**Variance**

$$\frac{\beta^2}{(\alpha - 1)^2(\alpha - 2)} \text{ for } \alpha > 2$$

930 **Relationships**

- Relationship pair:  $\text{Gamma1}(\alpha, \beta) \rightarrow \text{InverseGamma1}(\alpha, \beta)$
- Relationship type: Transformation
- Relationship definition: If  $X \sim \text{Gamma1}(\alpha, \beta)$  then  $X^{-1} \sim \text{InverseGamma1}(\alpha, \beta^{-1})$

**References**

- 935 [http://en.wikipedia.org/wiki/Inverse-gamma\\_distribution](http://en.wikipedia.org/wiki/Inverse-gamma_distribution)  
<http://www.uncertml.org/distributions/inverse-gamma>

**InverseGaussian1**

**name** Inverse Gaussian 1 (ID: 0000212)  
**type** continuous  
**variate**  $x$ , scalar  
**support**  $x \in (0, +\infty)$

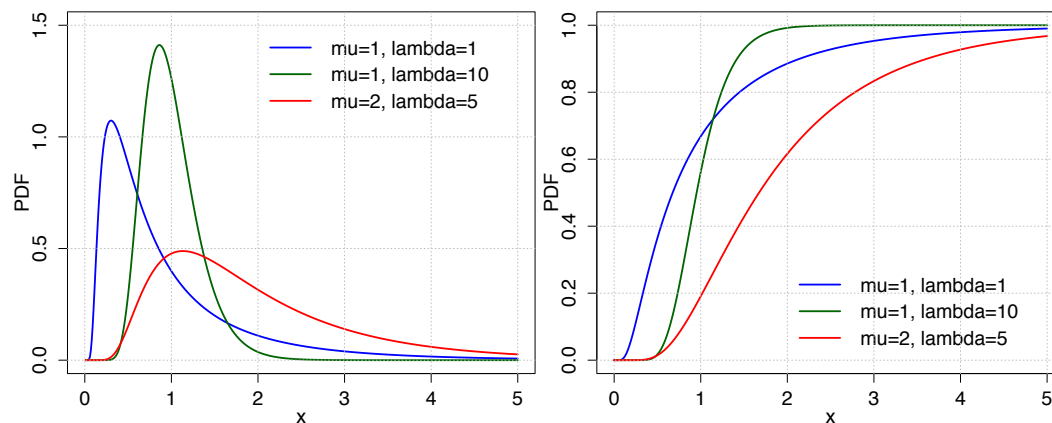

Figure 1.32: InverseGaussian1 distribution plotted using the provided R code.

**Parameter: shape**

**name** shape  
**type** scalar  
 940 **symbol**  $\lambda$   
**definition**  $\lambda > 0$

**Parameter: mean**

**name** mean  
**type** scalar  
**symbol**  $\mu$   
**definition**  $\mu > 0$

**Functions****PDF**

$$\sqrt{\frac{\lambda}{2\pi x^3}} \exp\left(-\frac{\lambda}{2\mu^2 x}(x-\mu)^2\right)$$

**PDF in R**

945 `sqrt(lambda/(2*pi*x^3)) * exp(-lambda/(2*mu^2*x) * (x-mu)^2)`

**CDF**

$$\Phi\left(\sqrt{\frac{\lambda}{x}}\left(\frac{x}{\mu}-1\right)\right) + \exp\left(\frac{2\lambda}{\mu}\right)\Phi\left(-\sqrt{\frac{\lambda}{x}}\left(\frac{x}{\mu}+1\right)\right)$$

**CDF in R**

`pnorm(sqrt(lambda/x) * (x/mu-1)) + exp(2*lambda/mu) * pnorm(-sqrt(lambda/x) * (x/mu+1))`

**Relationships**

- Relationship pair: *InverseGaussian1*( $\lambda, \mu$ )  $\rightarrow$  *StandardNormal1*(0, 1)
- 950 - Relationship type: Limiting
- Relationship definition:  $\lambda \rightarrow \infty$
- Relationship pair: *InverseGaussian1*( $\lambda, \mu$ )  $\rightarrow$  *ChiSquared1*( $k$ )
- Relationship type: Transformation
- Relationship definition:  $X \sim \text{InverseGaussian1}(\lambda, \mu)$  and  $Y = \lambda(X - \mu)^2 / (\mu^2 X) \Rightarrow Y \sim \text{ChiSquared1}(k)$

955 **References**

[Leemis and Mcqueston, 2008]

[https://en.wikipedia.org/wiki/Inverse\\_Gaussian\\_distribution](https://en.wikipedia.org/wiki/Inverse_Gaussian_distribution)

<http://www.math.wm.edu/~leemis/chart/UDR/PDFs/InversegaussianStandardnormal.pdf>

<http://www.math.wm.edu/~leemis/chart/UDR/PDFs/InversegaussianChisquare.pdf>

960 **InverseWishart1**

**name** Inverse-Wishart 1 (ID: 0000232)  
**type** continuous  
**variate**  $X$ , matrix  
**support**  $X(p \times p)$  – positive-definite matrix

**Parameter: scaleMatrix**

**name** scale matrix  
**type** matrix  
**symbol**  $\Psi$   
**definition**  $\Psi > 0$ , positive-definite matrix

**Parameter: degreesOfFreedom**

**name** degrees of freedom  
**type** scalar  
 965 **symbol**  $\nu$   
**definition**  $\nu > p - 1, \nu \in R$

**Functions****PDF**

$$\frac{|\Psi|^{\frac{\nu}{2}}}{2^{\frac{\nu p}{2}} \Gamma_p\left(\frac{\nu}{2}\right)} |X|^{-\frac{\nu+p+1}{2}} e^{-\frac{1}{2}\text{tr}(\Psi X^{-1})}$$

**Characteristics****Mean**

$$\frac{\Psi}{\nu - p - 1} \text{ for } \nu > p + 1$$

**Mode**

$$\frac{\Psi}{\nu + p + 1}$$

**References**

970 [https://en.wikipedia.org/wiki/Inverse-Wishart\\_distribution](https://en.wikipedia.org/wiki/Inverse-Wishart_distribution)

**Laplace1**

**name** Laplace 1 (ID: 0000256)  
**type** continuous  
**variate**  $x$ , scalar  
**support**  $x \in (-\infty, +\infty)$

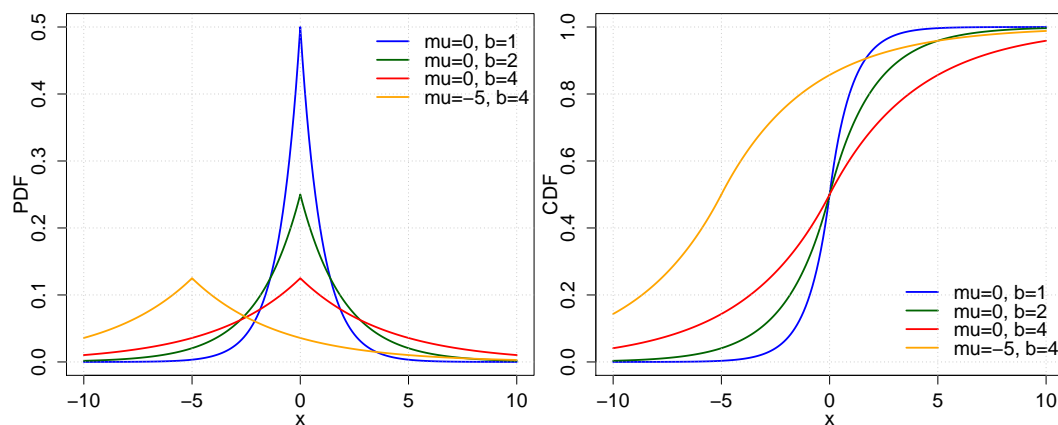

Figure 1.33: Laplace1 distribution plotted using the provided R code.

**Parameter: location**

**name** location  
**type** scalar  
**symbol**  $\mu$   
**definition**  $\mu \in R$

975 **Parameter: scale**

**name** scale  
**type** scalar  
**symbol**  $b$   
**definition**  $b > 0, b \in R$

**Functions****PDF**

$$\frac{1}{2b} \exp\left(-\frac{|x - \mu|}{b}\right)$$

**PDF in R**

`1/(2*b) * exp(- abs(x-mu)/b )`

**CDF**

$$\begin{cases} \frac{1}{2} \exp\left(\frac{x-\mu}{b}\right) & \text{if } x < \mu \\ 1 - \frac{1}{2} \exp\left(-\frac{x-\mu}{b}\right) & \text{if } x \geq \mu \end{cases}$$

980 **CDF in R**

```
1/2 * exp( (x-mu)/b ) # for x < mu
1- 1/2 * exp( -(x-mu)/b ) # x >= mu
```

**Characteristics****Mean** $\mu$ **Median** $\mu$ **Mode** $\mu$ **Variance** $2b^2$ **Relationships**

- 985 - Relationship pair:  $Laplace1(\mu, b) \rightarrow Laplace2(\mu, \tau)$   
 - Relationship type: Reparameterisation  
 - Relationship definition:  $\tau = 1/b$   
 - Relationship pair:  $Laplace2(\mu, \tau) \rightarrow Laplace1(\mu, b)$   
 - Relationship type: Reparameterisation  
 990 - Relationship definition:  $b = 1/\tau$

**References**

[https://en.wikipedia.org/wiki/Laplace\\_distribution](https://en.wikipedia.org/wiki/Laplace_distribution)  
<http://www.uncertml.org/distributions/laplace>

**Laplace2**

995 **name** Laplace 2 (ID: 0000283)  
**type** continuous  
**variate**  $x$ , scalar  
**support**  $x \in (-\infty, +\infty)$

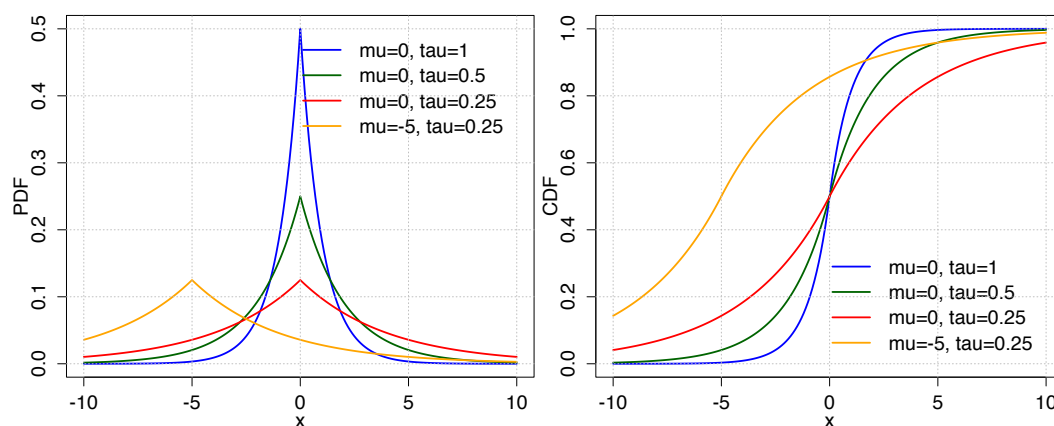

Figure 1.34: Laplace2 distribution plotted using the provided R code.

**Parameter: location**

|                   |             |
|-------------------|-------------|
| <b>name</b>       | location    |
| <b>type</b>       | scalar      |
| <b>symbol</b>     | $\mu$       |
| <b>definition</b> | $\mu \in R$ |

**Parameter: tau**

|                   |                        |
|-------------------|------------------------|
| <b>name</b>       | precision              |
| <b>type</b>       | scalar                 |
| <b>symbol</b>     | $\tau$                 |
| <b>definition</b> | $\tau > 0, \tau \in R$ |

1000 **Functions****PDF**

$$\frac{\tau}{2} \exp(-\tau|x - \mu|)$$

**PDF in R**

tau/2 \* exp(-tau \* abs(x-mu))

**CDF**

$$\begin{cases} \frac{1}{2} \exp(\tau(x - \mu)) & \text{if } x < \mu \\ 1 - \frac{1}{2} \exp(-\tau(x - \mu)) & \text{if } x \geq \mu \end{cases}$$

**CDF in R**

1/2 \* exp( tau\*(x-mu) ) # for x < mu  
 1005 1- 1/2 \* exp( -tau\*(x-mu) ) # x >= mu

**Characteristics****Mean**

$$\mu$$

**Variance**

$$2/\tau^2$$

**Relationships**

- Relationship pair:  $Laplace2(\mu, \tau) \rightarrow Laplace1(\mu, b)$
- Relationship type: Reparameterisation
- 1010 - Relationship definition:  $b = 1/\tau$
- Relationship pair:  $Laplace1(\mu, b) \rightarrow Laplace2(\mu, \tau)$
- Relationship type: Reparameterisation
- Relationship definition:  $\tau = 1/b$

**References**

1015 [Spiegelhalter et al., 2003], [Lunn, 2012]

**LogLogistic1**

|                |                              |
|----------------|------------------------------|
| <b>name</b>    | Log-Logistic 1 (ID: 0000377) |
| <b>type</b>    | continuous                   |
| <b>variate</b> | $x$ , scalar                 |
| <b>support</b> | $x \in [0, +\infty)$         |

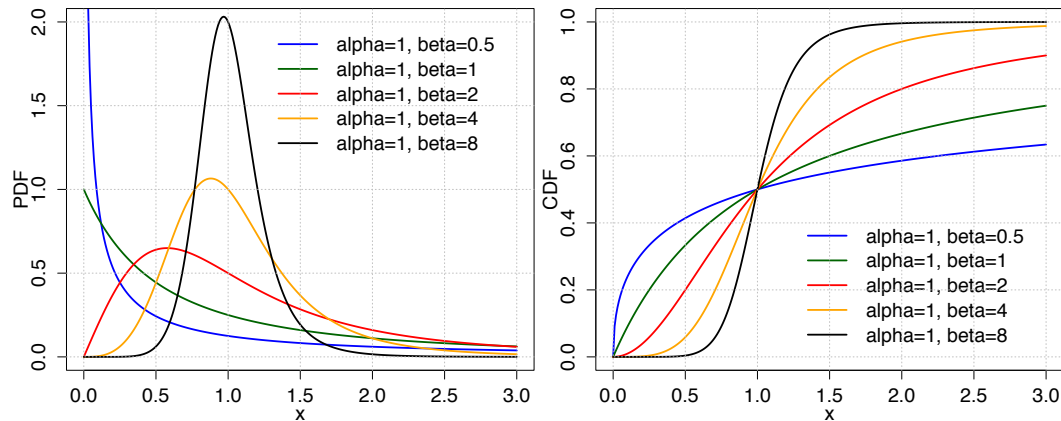

Figure 1.35: LogLogistic1 distribution plotted using the provided R code.

**Parameter: scale**

|                   |              |
|-------------------|--------------|
| <b>name</b>       | scale        |
| <b>type</b>       | scalar       |
| <b>symbol</b>     | $\alpha$     |
| <b>definition</b> | $\alpha > 0$ |

1020 **Parameter: shape**

|                   |             |
|-------------------|-------------|
| <b>name</b>       | shape       |
| <b>type</b>       | scalar      |
| <b>symbol</b>     | $\beta$     |
| <b>definition</b> | $\beta > 0$ |

**Functions****PDF**

$$\frac{(\beta/\alpha)(x/\alpha)^{\beta-1}}{(1+(x/\alpha)^\beta)^2}$$

**PDF in R**

```
(beta/alpha)*(x/alpha)^(beta-1) / (1+(x/alpha)^beta)^2
```

**CDF**

$$\frac{1}{1+(x/\alpha)^{-\beta}}$$

1025 **CDF in R**

```
1 / (1+(x/alpha)^(-beta))
```

**Characteristics****Mean**

$$\frac{\alpha\pi/\beta}{\sin(\pi/\beta)} \text{ if } \beta > 1, \text{ else undefined}$$

**Median**

$$\alpha$$

**Mode**

$$\alpha \left( \frac{\beta-1}{\beta+1} \right)^{1/\beta} \text{ if } \beta > 1, 0 \text{ otherwise}$$

**Variance**

$$\alpha^2 \left( \frac{2\pi/\beta}{\sin(2\pi/\beta)} - \frac{(\pi/\beta)^2}{\sin^2(\pi/\beta)} \right), \text{ for } \beta > 2$$

**Relationships**

- Relationship pair:  $LogLogistic1(\alpha, \beta) \rightarrow Logistic1(\mu, s)$
- 1030 - Relationship type: Transformation
- Relationship definition: If  $X \sim LogLogistic1(\alpha, \beta) \Rightarrow Y = \log(X) \sim Logistic1(\mu, s)$  with  $\mu = \log(\alpha), s = 1/\beta$
- Relationship pair:  $LogLogistic1(\alpha, \beta) \rightarrow LogLogistic2(\lambda, \kappa)$
- Relationship type: Reparameterisation
- 1035 - Relationship definition:  $\lambda = 1/\alpha$
- Relationship pair:  $LogLogistic2(\lambda, \kappa) \rightarrow LogLogistic1(\alpha, \beta)$
- Relationship type: Reparameterisation
- Relationship definition:  $\alpha = 1/\lambda$

**References**

- 1040 [http://en.wikipedia.org/wiki/Logistic\\_distribution](http://en.wikipedia.org/wiki/Logistic_distribution)
- <http://www.uncertml.org/distributions/logistic>

**LogLogistic2**

**name** Log-Logistic 2 (ID: 0000402)  
**type** continuous  
**variate**  $x$ , scalar  
**support**  $x \in (0, +\infty)$

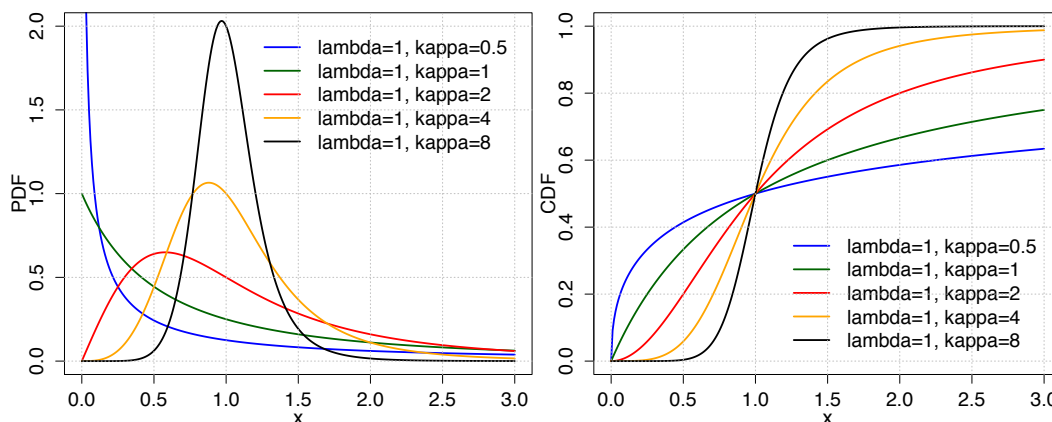

Figure 1.36: LogLogistic2 distribution plotted using the provided R code.

**Parameter: scale**

**name** scale  
**type** scalar  
 1045 **symbol**  $\lambda$   
**definition**  $\lambda > 0$

**Parameter: shape**

**name** shape  
**type** scalar  
**symbol**  $\kappa$   
**definition**  $\kappa > 0$



**Functions****PDF**

$$\frac{\lambda\kappa(\lambda x)^{\kappa-1}}{(1+(\lambda x)^\kappa)^2}$$

**PDF in R**

1050  $(\lambda x)^\kappa / (1+(\lambda x)^\kappa)^2$

**CDF**

$$\frac{(\lambda x)^\kappa}{1+(\lambda x)^\kappa}$$

**CDF in R**

$(\lambda x)^\kappa / (1+(\lambda x)^\kappa)$

**Characteristics****Mean**

$$\frac{\pi}{\kappa\lambda \sin(\pi/\kappa)}$$

**Median**

$$1/\lambda$$

**Variance**

$$\frac{\pi(2\kappa[1 - \cos(\frac{\pi}{\kappa})^2] + \pi \sin(\frac{\pi(\kappa+2)}{\kappa}))}{\sin(\frac{\pi(\kappa+2)}{\kappa})(\cos^2(\frac{\pi}{\kappa}) - 1)(\lambda\kappa)^2}$$

**Relationships**

- 1055 - Relationship pair:  $LogLogistic2(\lambda, \kappa) \rightarrow LogLogistic1(\alpha, \beta)$   
 - Relationship type: Reparameterisation  
 - Relationship definition:  $\alpha = 1/\lambda$   
 - Relationship pair:  $StandardUniform1 \rightarrow LogLogistic2(\lambda, \kappa)$   
 - Relationship type: Transformation  
 1060 - Relationship definition: If  $X \sim StandardUniform1$  and  $Y = \frac{1}{\lambda} \left( \frac{1-X}{X} \right)^{1/\kappa} \Rightarrow Y \sim LogLogistic2(\lambda, \kappa)$   
 - Relationship pair:  $LogLogistic1(\alpha, \beta) \rightarrow LogLogistic2(\lambda, \kappa)$   
 - Relationship type: Reparameterisation  
 - Relationship definition:  $\lambda = 1/\alpha$

**References**

- 1065 [Leemis and Mcqueston, 2008]  
<http://www.math.wm.edu/~leemis/chart/UDR/PDFs/Loglogistic.pdf>

**LogNormal1**

**name** Log-Normal 1 (ID: 0000428)  
**type** continuous  
**variate**  $x$ , scalar  
**support**  $x \in (0, +\infty)$

**Parameter: meanLog**

**name** mean of log(x)  
**type** scalar  
 1070 **symbol**  $\mu$   
**definition**  $\mu \in R$

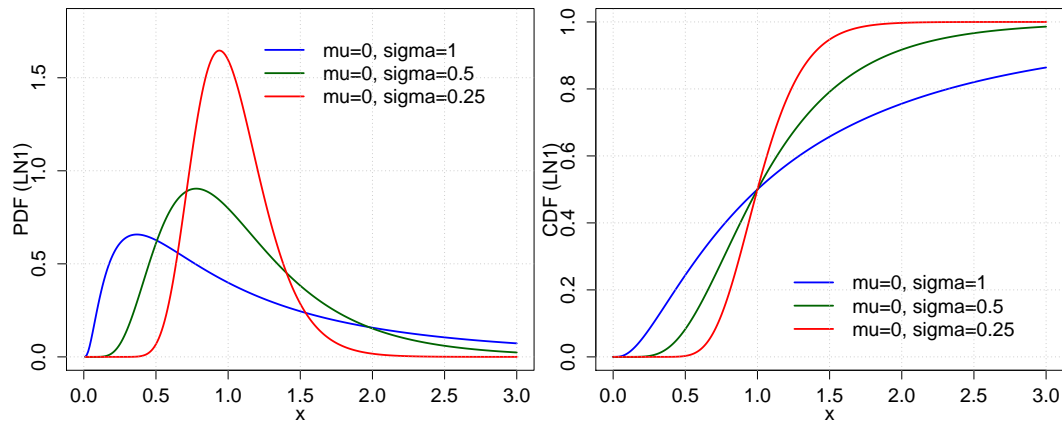

Figure 1.37: LogNormal1 distribution plotted using the provided R code.

**Parameter: stdevLog**

|                   |              |
|-------------------|--------------|
| <b>name</b>       | shape        |
| <b>type</b>       | scalar       |
| <b>symbol</b>     | $\sigma$     |
| <b>definition</b> | $\sigma > 0$ |

**Functions****PDF**

$$\frac{1}{x\sigma\sqrt{2\pi}} e^{-\frac{(\log x - \mu)^2}{2\sigma^2}}$$

**PDF in R**

```
1075 1/(x*sigma*sqrt(2*pi)) * exp((-log(x)-mu)^2)/(2*sigma^2))
```

**CDF**

$$\frac{1}{2} + \frac{1}{2} \operatorname{erf}\left[\frac{\log x - \mu}{\sqrt{2}\sigma}\right]$$

**CDF in R**

```
1/2 + 1/2 *erf( (log(x)-mu)/(sqrt(2)*sigma) )
```

**Characteristics****Mean**

$$e^{\mu + \sigma^2/2}$$

**Median**

$$e^{\mu}$$

**Mode**

$$e^{\mu - \sigma^2}$$

**Variance**

$$(e^{\sigma^2} - 1)e^{2\mu + \sigma^2}$$

**Relationships**

- 1080 - Relationship pair:  $\text{LogNormal1}(\mu, \sigma) \rightarrow \text{Normal1}(\mu, \sigma)$
- Relationship type: Transformation
- Relationship definition:  $\log(X)$
- Relationship pair:  $\text{LogNormal1}(\mu, \sigma) \rightarrow \text{LogNormal2}(\mu, v)$
- Relationship type: Reparameterisation
- 1085 - Relationship definition:  $\mu = \mu, v = \sigma^2$

- Relationship pair:  $LogNormal1(\mu, \sigma) \rightarrow LogNormal6(m, \sigma_g)$
- Relationship type: Reparameterisation
- Relationship definition:  $m = \exp(\mu), \sigma_g = \exp(\sigma)$
- Relationship pair:  $LogNormal1(\mu, \sigma) \rightarrow LogNormal3(m, \sigma)$
- 1090 - Relationship type: Reparameterisation
- Relationship definition:  $m = \exp(\mu), \sigma = \sigma$
- Relationship pair:  $LogNormal1(\mu, \sigma) \rightarrow LogNormal4(m, cv)$
- Relationship type: Reparameterisation
- Relationship definition:  $m = \exp(\mu), cv = \sqrt{\exp(\sigma^2) - 1}$
- 1095 - Relationship pair:  $LogNormal1(\mu, \sigma) \rightarrow LogNormal5(\mu, \tau)$
- Relationship type: Reparameterisation
- Relationship definition:  $\mu = \mu, \tau = 1/\sigma^2$
- Relationship pair:  $Normal1(\mu, \sigma) \rightarrow LogNormal1(\mu, \sigma)$
- Relationship type: Transformation
- 1100 - Relationship definition:  $\exp(X)$
- Relationship pair:  $LogNormal2(\mu, v) \rightarrow LogNormal1(\mu, \sigma)$
- Relationship type: Reparameterisation
- Relationship definition:  $\mu_{LogNormal1} = \mu, \sigma_{LogNormal1} = \sqrt{v}$
- Relationship pair:  $LogNormal6(m, \sigma_g) \rightarrow LogNormal1(\mu, \sigma)$
- 1105 - Relationship type: Reparameterisation
- Relationship definition:  $\mu = \log(m), \sigma = \log(\sigma_g)$
- Relationship pair:  $LogNormal3(m, \sigma) \rightarrow LogNormal1(\mu, \sigma)$
- Relationship type: Reparameterisation
- Relationship definition:  $\mu = \log(m), \sigma = \sigma$
- 1110 - Relationship pair:  $LogNormal4(m, cv) \rightarrow LogNormal1(\mu, \sigma)$
- Relationship type: Reparameterisation
- Relationship definition:  $\mu = \log(m), \sigma = \sqrt{\log(cv^2 + 1)}$
- Relationship pair:  $LogNormal5(\mu, \tau) \rightarrow LogNormal1(\mu, \sigma)$
- Relationship type: Reparameterisation
- 1115 - Relationship definition:  $\mu = \mu, \sigma = 1/\sqrt{\tau}$

## References

- [Leemis and Mcqueston, 2008]  
[http://en.wikipedia.org/wiki/Log-normal\\_distribution](http://en.wikipedia.org/wiki/Log-normal_distribution)  
<http://www.uncertml.org/distributions/log-normal>  
 1120 <http://www.math.wm.edu/~leemis/chart/UDR/PDFs/NormalLognormal.pdf>  
<http://www.math.wm.edu/~leemis/chart/UDR/PDFs/NormalLognormal.pdf>

## LogNormal2

**name** Log-Normal 2 (ID: 0000453)  
**type** continuous  
**variate**  $x$ , scalar  
**support**  $x \in (0, +\infty)$

### Parameter: meanLog

**name** mean of  $\log(x)$   
**type** scalar  
 1125 **symbol**  $\mu$   
**definition**  $\mu \in R$

### Parameter: varLog

**name** shape  
**type** scalar  
**symbol**  $v$   
**definition**  $v > 0$

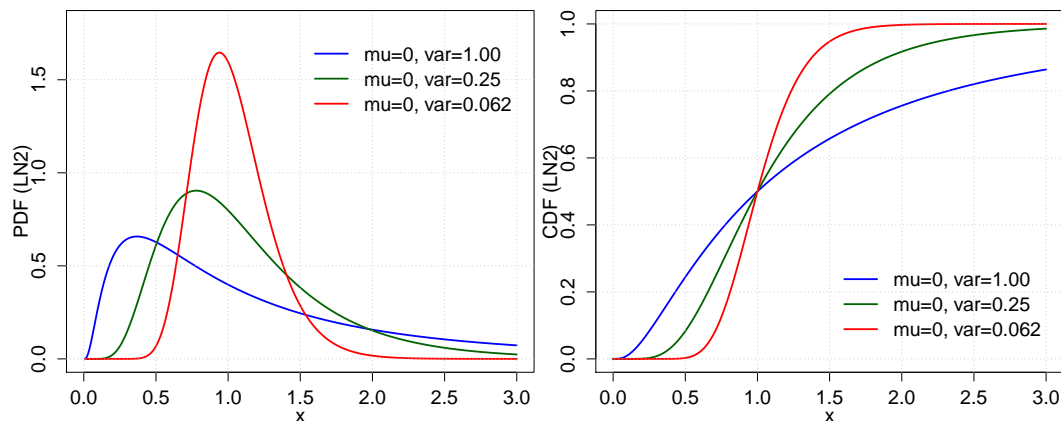

Figure 1.38: LogNormal2 distribution plotted using the provided R code.

## Functions

### PDF

$$\frac{1}{x\sqrt{v}\sqrt{2\pi}} e^{-\frac{(\log x - \mu)^2}{2v}}$$

### PDF in R

```
1130 1/(x*sqrt(v)*sqrt(2*pi)) * exp(-(ln(x)-mu)^2/(2*v))
```

### CDF

$$\frac{1}{2} + \frac{1}{2} \operatorname{erf}\left[\frac{\log x - \mu}{\sqrt{2}\sqrt{var}}\right]$$

### CDF in R

```
1/2 + 1/2 * erf( (log(x)-mu) / (sqrt(2)*sqrt(var)) )
```

## Characteristics

### Mean

$$e^{\mu+v/2}$$

### Median

$$e^{\mu}$$

### Mode

$$e^{\mu-v}$$

### Variance

$$(e^v - 1)e^{2\mu+v}$$

## Relationships

- ```
1135 - Relationship pair: LogNormal2(mu, v) -> LogNormal1(mu, sigma)
- Relationship type: Reparameterisation
- Relationship definition: mu_LogNormal1 = mu, sigma_LogNormal1 = sqrt(v)
- Relationship pair: LogNormal2(mu, v) -> LogNormal6(m, sigma_g)
- Relationship type: Reparameterisation
1140 - Relationship definition: m = exp(mu), sigma_g = exp(sqrt(v))
- Relationship pair: LogNormal2(mu, v) -> LogNormal3(m, sigma)
- Relationship type: Reparameterisation
- Relationship definition: m = exp(mu), sigma = sqrt(v)
- Relationship pair: LogNormal2(mu, v) -> LogNormal4(m, cv)
1145 - Relationship type: Reparameterisation
- Relationship definition: m = exp(mu), cv = sqrt(exp(v) - 1)
```

- Relationship pair:  $LogNormal2(\mu, v) \rightarrow LogNormal5(\mu, \tau)$
- Relationship type: Reparameterisation
- Relationship definition:  $\mu = \mu, \tau = 1/v$
- 1150 - Relationship pair:  $LogNormal5(\mu, \tau) \rightarrow LogNormal2(\mu, v)$
- Relationship type: Reparameterisation
- Relationship definition:  $\mu = \mu, v = 1/\tau$
- Relationship pair:  $LogNormal1(\mu, \sigma) \rightarrow LogNormal2(\mu, v)$
- Relationship type: Reparameterisation
- 1155 - Relationship definition:  $\mu = \mu, v = \sigma^2$
- Relationship pair:  $LogNormal6(m, \sigma_g) \rightarrow LogNormal2(\mu, v)$
- Relationship type: Reparameterisation
- Relationship definition:  $\mu = \log(m), v = \log(\sigma_g^2)$
- Relationship pair:  $LogNormal3(m, \sigma) \rightarrow LogNormal2(\mu, v)$
- 1160 - Relationship type: Reparameterisation
- Relationship definition:  $\mu = \log(m), v = \sigma^2$
- Relationship pair:  $LogNormal4(m, cv) \rightarrow LogNormal2(\mu, v)$
- Relationship type: Reparameterisation
- Relationship definition:  $\mu = \log(m), v = \log(cv^2 + 1)$

## 1165 References

[http://en.wikipedia.org/wiki/Log-normal\\_distribution](http://en.wikipedia.org/wiki/Log-normal_distribution)  
<http://www.uncertml.org/distributions/log-normal>

## LogNormal3

**name** Log-Normal 3 (ID: 0000478)  
**type** continuous  
**variate**  $x$ , scalar  
**support**  $x \in (0, +\infty)$

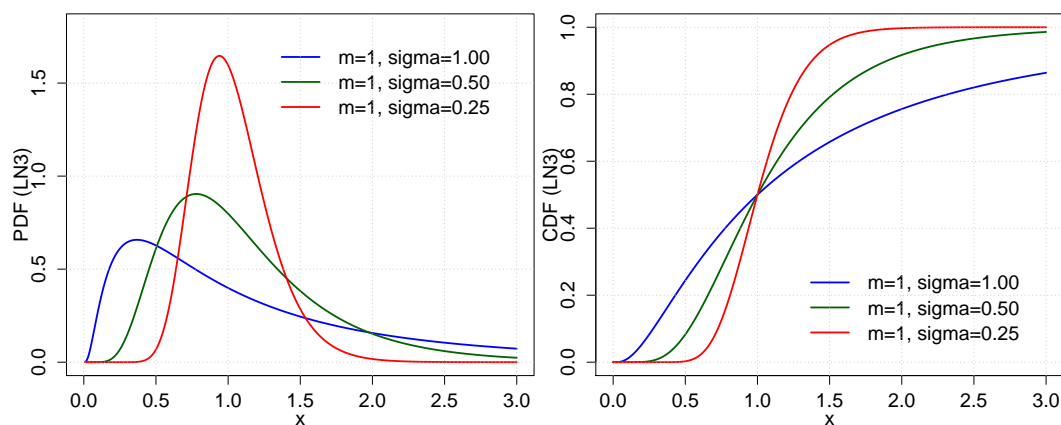

Figure 1.39: LogNormal3 distribution plotted using the provided R code.

## 1170 Parameter: median

**name** median / geometric mean  
**type** scalar  
**symbol**  $m$   
**definition**  $m > 0$

**Parameter: stdevLog**

|                   |              |
|-------------------|--------------|
| <b>name</b>       | shape        |
| <b>type</b>       | scalar       |
| <b>symbol</b>     | $\sigma$     |
| <b>definition</b> | $\sigma > 0$ |

**Functions****PDF**

$$\frac{1}{x\sigma\sqrt{2\pi}} e^{-\frac{[\log(x/m)]^2}{2\sigma^2}}$$

1175 **PDF in R**

```
1/(x*sigma*sqrt(2*pi)) * exp(-(log(x/m))^2 / (2*sigma^2))
```

**CDF**

$$\frac{1}{2} + \frac{1}{2} \operatorname{erf}\left[\frac{\log x - \log m}{\sqrt{2}\sigma}\right]$$

**CDF in R**

```
1/2 + 1/2 * erf( (log(x)-log(m)) / (sqrt(2)*sigma) )
```

**Characteristics****Mean**

$$me^{\frac{1}{2}\sigma^2}$$

**Median**

$$m$$

**Mode**

$$m/e^{\sigma^2}$$

**Variance**

$$m^2e^{\sigma^2}[e^{\sigma^2} - 1]$$

1180 **Relationships**

- Relationship pair:  $\text{LogNormal3}(m, \sigma) \rightarrow \text{LogNormal4}(m, cv)$
- Relationship type: Reparameterisation
- Relationship definition:  $m = m, cv = \sqrt{\exp(\sigma^2) - 1}$
- Relationship pair:  $\text{LogNormal3}(m, \sigma) \rightarrow \text{LogNormal5}(\mu, \tau)$
- 1185 - Relationship type: Reparameterisation
- Relationship definition:  $\mu = \log(m), \tau = 1/\sigma^2$
- Relationship pair:  $\text{LogNormal3}(m, \sigma) \rightarrow \text{LogNormal1}(\mu, \sigma)$
- Relationship type: Reparameterisation
- Relationship definition:  $\mu = \log(m), \sigma = \sigma$
- 1190 - Relationship pair:  $\text{LogNormal3}(m, \sigma) \rightarrow \text{LogNormal6}(m, \sigma_g)$
- Relationship type: Reparameterisation
- Relationship definition:  $m = m, \sigma_g = \exp(\sigma)$
- Relationship pair:  $\text{LogNormal3}(m, \sigma) \rightarrow \text{LogNormal2}(\mu, v)$
- Relationship type: Reparameterisation
- 1195 - Relationship definition:  $\mu = \log(m), v = \sigma^2$
- Relationship pair:  $\text{LogNormal4}(m, cv) \rightarrow \text{LogNormal3}(m, \sigma)$
- Relationship type: Reparameterisation
- Relationship definition:  $m = m, \sigma = \sqrt{\log(cv^2 + 1)}$
- Relationship pair:  $\text{LogNormal5}(\mu, \tau) \rightarrow \text{LogNormal3}(m, \sigma)$
- 1200 - Relationship type: Reparameterisation
- Relationship definition:  $m = \exp(\mu), \sigma = 1/\sqrt{\tau}$

- Relationship pair:  $LogNormal1(\mu, \sigma) \rightarrow LogNormal3(m, \sigma)$
- Relationship type: Reparameterisation
- Relationship definition:  $m = \exp(\mu), \sigma = \sigma$
- 1205 - Relationship pair:  $LogNormal6(m, \sigma_g) \rightarrow LogNormal3(m, \sigma)$
- Relationship type: Reparameterisation
- Relationship definition:  $m = m, \sigma = \log(\sigma_g)$
- Relationship pair:  $LogNormal2(\mu, v) \rightarrow LogNormal3(m, \sigma)$
- Relationship type: Reparameterisation
- 1210 - Relationship definition:  $m = \exp(\mu), \sigma = \sqrt{v}$

**References**

[Leemis and Mcqueston, 2008]  
<http://www.math.wm.edu/~leemis/chart/UDR/PDFs/Lognormal.pdf>

## LogNormal4

1215 **name** Log-Normal 4 (ID: 0000500)  
**type** continuous  
**variate**  $x$ , scalar  
**support**  $x \in (0, +\infty)$

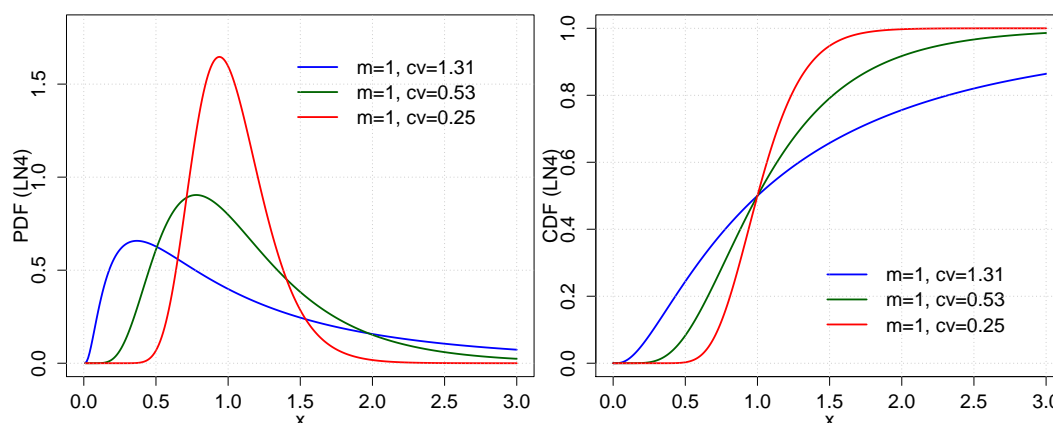

Figure 1.40: LogNormal4 distribution plotted using the provided R code.

**Parameter: median**

**name** median / geometric mean  
**type** scalar  
**symbol**  $m$   
**definition**  $m > 0$

**Parameter: coefVar**

**name** coefficient of variation  
**type** scalar  
**symbol**  $cv$   
**definition**  $cv > 0$

1220 **Functions**

**PDF**

$$\frac{1}{x\sqrt{\log(cv^2 + 1)}\sqrt{2\pi}} e^{-\frac{[\log(x/m)]^2}{2 \ln(cv^2 + 1)}}$$

**PDF in R**

$$1/(x*\sqrt{\log(cv^2+1)}*\sqrt{2*\pi}) * \exp(-(\log(x/m))^2 / (2*\log(cv^2+1)))$$

CDF

$$\frac{1}{2} + \frac{1}{2} \operatorname{erf}\left[\frac{\log x - \log m}{\sqrt{2}\sqrt{\log(cv^2 + 1)}}\right]$$

CDF in R

$$1/2 + 1/2 * \operatorname{erf}((\log(x)-\log(m)) / (\sqrt{2*\log(cv^2+1)}))$$

1225 **Characteristics**

Mean

$$m\sqrt{cv^2 + 1}$$

Median

$$m$$

Mode

$$m/(cv^2 + 1)$$

Variance

$$m^2(cv^2 + 1)cv^2$$

**Relationships**

- Relationship pair:  $\text{LogNormal4}(m, cv) \rightarrow \text{LogNormal3}(m, \sigma)$
- Relationship type: Reparameterisation
- Relationship definition:  $m = m, \sigma = \sqrt{\log(cv^2 + 1)}$
- 1230 - Relationship pair:  $\text{LogNormal4}(m, cv) \rightarrow \text{LogNormal5}(\mu, \tau)$
- Relationship type: Reparameterisation
- Relationship definition:  $\mu = \log(m), \tau = 1/\log(cv^2 + 1)$
- Relationship pair:  $\text{LogNormal4}(m, cv) \rightarrow \text{LogNormal1}(\mu, \sigma)$
- Relationship type: Reparameterisation
- 1235 - Relationship definition:  $\mu = \log(m), \sigma = \sqrt{\log(cv^2 + 1)}$
- Relationship pair:  $\text{LogNormal4}(m, cv) \rightarrow \text{LogNormal6}(m, \sigma_g)$
- Relationship type: Reparameterisation
- Relationship definition:  $m = m, \sigma_g = \exp(\sqrt{\log(cv^2 + 1)})$
- Relationship pair:  $\text{LogNormal4}(m, cv) \rightarrow \text{LogNormal2}(\mu, v)$
- 1240 - Relationship type: Reparameterisation
- Relationship definition:  $\mu = \log(m), v = \log(cv^2 + 1)$
- Relationship pair:  $\text{LogNormal3}(m, \sigma) \rightarrow \text{LogNormal4}(m, cv)$
- Relationship type: Reparameterisation
- Relationship definition:  $m = m, cv = \sqrt{\exp(\sigma^2) - 1}$
- 1245 - Relationship pair:  $\text{LogNormal5}(\mu, \tau) \rightarrow \text{LogNormal4}(m, cv)$
- Relationship type: Reparameterisation
- Relationship definition:  $m = \exp(\mu), cv = \sqrt{\exp(1/\tau) - 1}$
- Relationship pair:  $\text{LogNormal1}(\mu, \sigma) \rightarrow \text{LogNormal4}(m, cv)$
- Relationship type: Reparameterisation
- 1250 - Relationship definition:  $m = \exp(\mu), cv = \sqrt{\exp(\sigma^2) - 1}$
- Relationship pair:  $\text{LogNormal6}(m, \sigma_g) \rightarrow \text{LogNormal4}(m, cv)$
- Relationship type: Reparameterisation
- Relationship definition:  $m = m, cv = \sqrt{\exp(\log^2(\sigma_g)) - 1}$
- Relationship pair:  $\text{LogNormal2}(\mu, v) \rightarrow \text{LogNormal4}(m, cv)$
- 1255 - Relationship type: Reparameterisation
- Relationship definition:  $m = \exp(\mu), cv = \sqrt{\exp(v) - 1}$



## LogNormal5

**name** Log-Normal 5 (ID: 0000526)  
**type** continuous  
**variate**  $x$ , scalar  
**support**  $x \in (0, +\infty)$

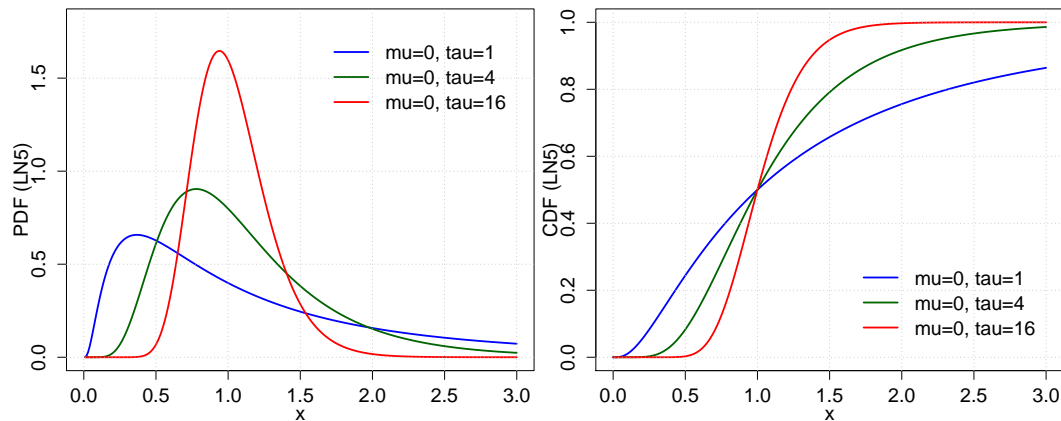

Figure 1.41: LogNormal5 distribution plotted using the provided R code.

### Parameter: meanLog

**name** mean of  $\log(x)$   
**type** scalar  
**symbol**  $\mu$   
**definition**  $\mu \in R$

### Parameter: precision

**name** precision  
**type** scalar  
**symbol**  $\tau$   
**definition**  $\tau > 0$

### Functions

#### PDF

$$\sqrt{\frac{\tau}{2\pi}} \frac{1}{x} e^{-\frac{\tau}{2}(\log x - \mu)^2}$$

#### PDF in R

1260 `sqrt(tau / (2*pi)) * (1/x) * exp(- (tau/2)*(log(x)-mu)^2 )`

#### CDF

$$\frac{1}{2} + \frac{1}{2} \operatorname{erf}\left[\frac{\log x - \mu}{\sqrt{2/\tau}}\right]$$

#### CDF in R

1265 `1/2 + 1/2 * erf( (log(x)-mu) / sqrt(2/tau) )`

**Characteristics****Mean**

$$e^{\mu + \frac{1}{2\tau}}$$

**Median**

$$e^{\mu}$$

**Mode**

$$e^{\mu - \frac{1}{\tau}}$$

**Variance**

$$e^{2\mu + \frac{1}{\tau}} [e^{\frac{1}{\tau}} - 1]$$

**Relationships**

- 1270 - Relationship pair:  $LogNormal5(\mu, \tau) \rightarrow LogNormal2(\mu, v)$   
 - Relationship type: Reparameterisation  
 - Relationship definition:  $\mu = \mu, v = 1/\tau$   
 - Relationship pair:  $LogNormal5(\mu, \tau) \rightarrow LogNormal3(m, \sigma)$   
 - Relationship type: Reparameterisation  
 1275 - Relationship definition:  $m = \exp(\mu), \sigma = 1/\sqrt{\tau}$   
 - Relationship pair:  $LogNormal5(\mu, \tau) \rightarrow LogNormal4(m, cv)$   
 - Relationship type: Reparameterisation  
 - Relationship definition:  $m = \exp(\mu), cv = \sqrt{\exp(1/\tau) - 1}$   
 - Relationship pair:  $LogNormal5(\mu, \tau) \rightarrow LogNormal1(\mu, \sigma)$   
 1280 - Relationship type: Reparameterisation  
 - Relationship definition:  $\mu = \mu, \sigma = 1/\sqrt{\tau}$   
 - Relationship pair:  $LogNormal5(\mu, \tau) \rightarrow LogNormal6(m, \sigma_g)$   
 - Relationship type: Reparameterisation  
 - Relationship definition:  $m = \exp(\mu), \sigma_g = \exp(1/\sqrt{\tau})$   
 1285 - Relationship pair:  $LogNormal3(m, \sigma) \rightarrow LogNormal5(\mu, \tau)$   
 - Relationship type: Reparameterisation  
 - Relationship definition:  $\mu = \log(m), \tau = 1/\sigma^2$   
 - Relationship pair:  $LogNormal4(m, cv) \rightarrow LogNormal5(\mu, \tau)$   
 - Relationship type: Reparameterisation  
 1290 - Relationship definition:  $\mu = \log(m), \tau = 1/\log(cv^2 + 1)$   
 - Relationship pair:  $LogNormal1(\mu, \sigma) \rightarrow LogNormal5(\mu, \tau)$   
 - Relationship type: Reparameterisation  
 - Relationship definition:  $\mu = \mu, \tau = 1/\sigma^2$   
 - Relationship pair:  $LogNormal6(m, \sigma_g) \rightarrow LogNormal5(\mu, \tau)$   
 1295 - Relationship type: Reparameterisation  
 - Relationship definition:  $\mu = \log(m), \tau = 1/\log^2(\sigma_g)$   
 - Relationship pair:  $LogNormal2(\mu, v) \rightarrow LogNormal5(\mu, \tau)$   
 - Relationship type: Reparameterisation  
 - Relationship definition:  $\mu = \mu, \tau = 1/v$

1300 **References**

[Spiegelhalter et al., 2003], [Lunn, 2012], [Plummer, 2003]

**LogNormal6**

|                |                            |
|----------------|----------------------------|
| <b>name</b>    | Log-Normal 6 (ID: 0000553) |
| <b>type</b>    | continuous                 |
| <b>variate</b> | $x$ , scalar               |
| <b>support</b> | $x \in (0, +\infty)$       |

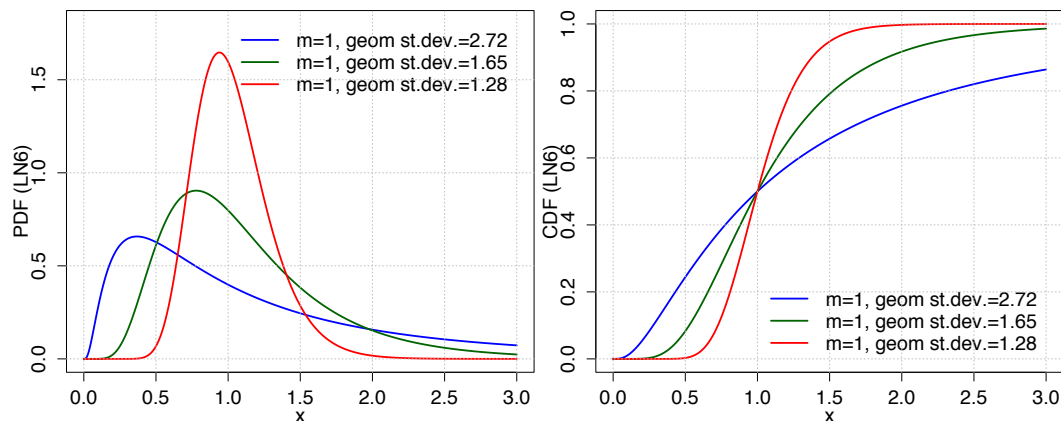

Figure 1.42: LogNormal6 distribution plotted using the provided R code.

**Parameter: median**

1305 **name** median / geometric mean  
**type** scalar  
**symbol**  $m$   
**definition**  $m > 0$

**Parameter: geomStdev**

**name** shape  
**type** scalar  
**symbol**  $\sigma_g$   
**definition**  $\sigma_g > 0$

**Functions**

**PDF**

$$\frac{1}{x \log(\sigma_g) \sqrt{2\pi}} \exp \left[ \frac{-[\log(x/m)]^2}{2 \log^2(\sigma_g)} \right]$$

**PDF in R**

```
1310 1/(x*log(sigma_g)*sqrt(2*pi))*exp(-(log(x/m))^2/(2*log(sigma_g)^2))
```

**CDF**

$$\frac{1}{2} + \frac{1}{2} \operatorname{erf} \left[ \frac{\log x - \log m}{\sqrt{2} \log(\sigma_g)} \right]$$

**CDF in R**

```
1/2 + 1/2 * erf( (log(x)-log(m)) / (sqrt(2)*log(sigma_g)) )
```

**Characteristics**

**Mean**

$$m e^{\frac{1}{2} \log^2(\sigma_g)}$$

**Median**

$$m$$

**Mode**

$$m/e^{\log^2(\sigma_g)}$$

**Variance**

$$m^2 e^{\log^2(\sigma_g)} [e^{\log^2(\sigma_g)} - 1]$$

**Relationships**

- 1315 - Relationship pair:  $LogNormal6(m, \sigma_g) \rightarrow LogNormal1(\mu, \sigma)$   
 - Relationship type: Reparameterisation  
 - Relationship definition:  $\mu = \log(m), \sigma = \log(\sigma_g)$   
 - Relationship pair:  $LogNormal6(m, \sigma_g) \rightarrow LogNormal2(\mu, v)$   
 - Relationship type: Reparameterisation  
 1320 - Relationship definition:  $\mu = \log(m), v = \log(\sigma_g^2)$   
 - Relationship pair:  $LogNormal6(m, \sigma_g) \rightarrow LogNormal3(m, \sigma)$   
 - Relationship type: Reparameterisation  
 - Relationship definition:  $m = m, \sigma = \log(\sigma_g)$   
 - Relationship pair:  $LogNormal6(m, \sigma_g) \rightarrow LogNormal4(m, cv)$   
 1325 - Relationship type: Reparameterisation  
 - Relationship definition:  $m = m, cv = \sqrt{\exp(\log^2(\sigma_g)) - 1}$   
 - Relationship pair:  $LogNormal6(m, \sigma_g) \rightarrow LogNormal5(\mu, \tau)$   
 - Relationship type: Reparameterisation  
 - Relationship definition:  $\mu = \log(m), \tau = 1/\log^2(\sigma_g)$   
 1330 - Relationship pair:  $LogNormal1(\mu, \sigma) \rightarrow LogNormal6(m, \sigma_g)$   
 - Relationship type: Reparameterisation  
 - Relationship definition:  $m = \exp(\mu), \sigma_g = \exp(\sigma)$   
 - Relationship pair:  $LogNormal2(\mu, v) \rightarrow LogNormal6(m, \sigma_g)$   
 - Relationship type: Reparameterisation  
 1335 - Relationship definition:  $m = \exp(\mu), \sigma_g = \exp(\sqrt{v})$   
 - Relationship pair:  $LogNormal3(m, \sigma) \rightarrow LogNormal6(m, \sigma_g)$   
 - Relationship type: Reparameterisation  
 - Relationship definition:  $m = m, \sigma_g = \exp(\sigma)$   
 - Relationship pair:  $LogNormal4(m, cv) \rightarrow LogNormal6(m, \sigma_g)$   
 1340 - Relationship type: Reparameterisation  
 - Relationship definition:  $m = m, \sigma_g = \exp(\sqrt{\log(cv^2 + 1)})$   
 - Relationship pair:  $LogNormal5(\mu, \tau) \rightarrow LogNormal6(m, \sigma_g)$   
 - Relationship type: Reparameterisation  
 - Relationship definition:  $m = \exp(\mu), \sigma_g = \exp(1/\sqrt{\tau})$

1345 **References**

[Limpert et al., 2001]

**LogUniform1**

**name** Log-Uniform 1 (ID: 0000580)  
**type** continuous  
**variate**  $x$ , scalar  
**support**  $x \in (min, max)$

**Parameter: minimum**

**name** minimum  
**type** scalar  
 1350 **symbol**  $min$   
**definition**  $min > 0$

**Parameter: maximum**

**name** maximum  
**type** scalar  
**symbol**  $max$   
**definition**  $max \geq min$

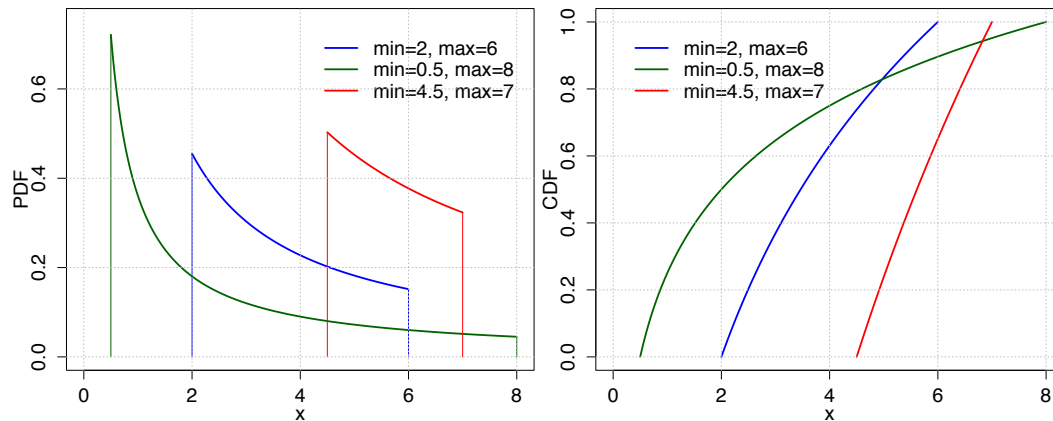

Figure 1.43: LogUniform1 distribution plotted using the provided R code.

## Functions

### PDF

$$\frac{1}{x(\log(max) - \log(min))}$$

### PDF in R

```
1355 1/(x*(log(max) - log(min)))
```

### CDF

$$\frac{\log(x) - \log(min)}{\log(max) - \log(min)}$$

### CDF in R

```
(log(x) - log(min)) / (log(max) - log(min))
```

## Characteristics

### Mean

$$\frac{max - min}{\log(max) - \log(min)}$$

### Variance

$$\frac{max^2 - min^2}{2[\log(max) - \log(min)]} - \left( \frac{max - min}{\log(max) - \log(min)} \right)^2$$

## References

```
1360 http://www.vosesoftware.com/ModelRiskHelp/index.htm#Distributions/Continuous_distributions/
LogUniform_distribution.htm
```

## Logistic1

**name** Logistic 1 (ID: 0000307)  
**type** continuous  
**variate**  $x$ , scalar  
**support**  $x \in (-\infty, +\infty)$

### Parameter: location

**name** location  
**type** scalar  
**symbol**  $\mu$   
**definition**  $\mu \in R$

```
1365
```

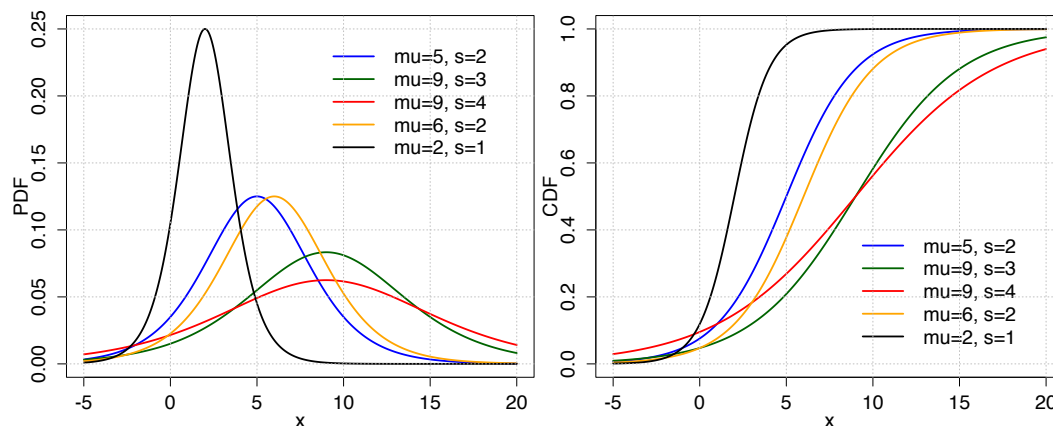

Figure 1.44: Logistic1 distribution plotted using the provided R code.

**Parameter: scale**

|                   |                  |
|-------------------|------------------|
| <b>name</b>       | scale            |
| <b>type</b>       | scalar           |
| <b>symbol</b>     | $s$              |
| <b>definition</b> | $s > 0, s \in R$ |

**Functions**

**PDF**

$$\frac{e^{-\frac{x-\mu}{s}}}{s \left(1 + e^{-\frac{x-\mu}{s}}\right)^2}$$

**PDF in R**

```
1370 exp(-(x-mu)/s) / (s*(1+exp(-(x-mu)/s))^2)
```

**CDF**

$$\frac{1}{1 + e^{-\frac{x-\mu}{s}}}$$

**CDF in R**

```
1/(1+exp(-(x-mu)/s))
```

**Characteristics**

**Mean**

$$\mu$$

**Median**

$$\mu$$

**Mode**

$$\mu$$

**Variance**

$$\frac{s^2 \pi^2}{3}$$

**Relationships**

- 1375 - Relationship pair:  $Logistic1(\mu, s) \rightarrow Logistic2(\mu, \tau)$
- Relationship type: Reparameterisation
- Relationship definition:  $\tau = 1/s$
- Relationship pair:  $LogLogistic1(\alpha, \beta) \rightarrow Logistic1(\mu, s)$
- Relationship type: Transformation
- 1380 - Relationship definition: If  $X \sim LogLogistic1(\alpha, \beta) \Rightarrow Y = \log(X) \sim Logistic1(\mu, s)$  with  $\mu = \log(\alpha), s = 1/\beta$
- Relationship pair:  $Logistic2(\mu, \tau) \rightarrow Logistic1(\mu, s)$
- Relationship type: Reparameterisation
- Relationship definition:  $s = 1/\tau$

1385 **References**

[http://en.wikipedia.org/wiki/Logistic\\_distribution](http://en.wikipedia.org/wiki/Logistic_distribution)  
<http://www.uncertml.org/distributions/logistic>

**Logistic2**

**name** Logistic 2 (ID: 0000331)  
**type** continuous  
**variate**  $x$ , scalar  
**support**  $x \in (-\infty, +\infty)$

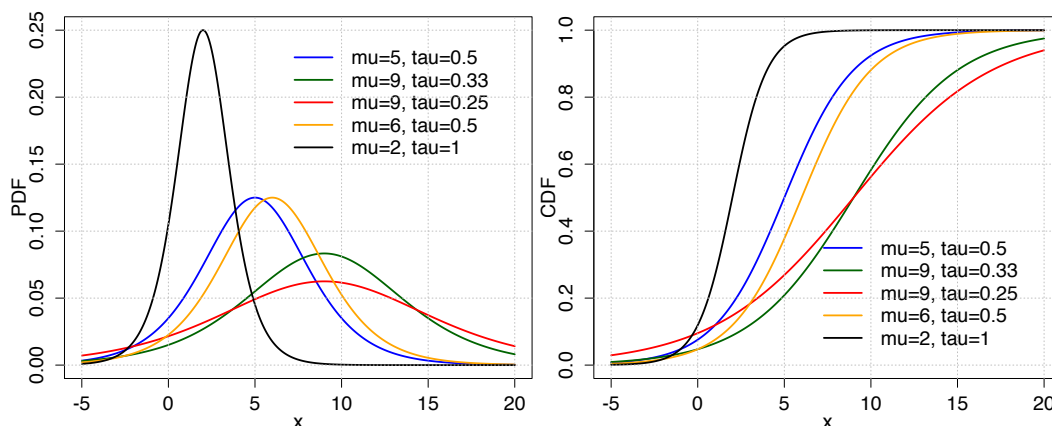

Figure 1.45: Logistic2 distribution plotted using the provided R code.

1390 **Parameter: location**

**name** location  
**type** scalar  
**symbol**  $\mu$   
**definition**  $\mu \in R$

**Parameter: inverseScale**

**name** inverse scale  
**type** scalar  
**symbol**  $\tau$   
**definition**  $\tau > 0, \tau \in R$

**Functions****PDF**

$$\frac{\tau e^{-\tau(x-\mu)}}{(1 + e^{-\tau(x-\mu)})^2}$$

1395 **PDF in R**

```
(tau * exp(-tau*(x-mu))) / (1+exp(-tau*(x-mu)))^2
```

**CDF**

$$\frac{1}{1 + e^{-\tau(x-\mu)}}$$

**CDF in R**

```
1/(1+exp(-tau*(x-mu)))
```

**Characteristics****Mean**

$$\mu$$

**Median**

$$\mu$$

**Mode**

$$\mu$$

**Variance**

$$\frac{\pi^2}{3\tau^2}$$

1400 **Relationships**

- Relationship pair:  $Logistic2(\mu, \tau) \rightarrow Logistic1(\mu, s)$
- Relationship type: Reparameterisation
- Relationship definition:  $s = 1/\tau$
- Relationship pair:  $Logistic1(\mu, s) \rightarrow Logistic2(\mu, \tau)$
- 1405 - Relationship type: Reparameterisation
- Relationship definition:  $\tau = 1/s$

**References**

[Spiegelhalter et al., 2003]

**MixtureDistribution1**

1410 **name** Mixture Distribution 1 (ID: 0000630)  
**type** continuous  
**variate** -, -  
**support** -

**Parameter: weight**

**name** mixing coefficients  
**type** vector  
**symbol**  $\pi_1, \dots, \pi_k$   
**definition**  $\sum_{i=1}^K \pi_i = 1; 0 \leq \pi_i \leq 1$



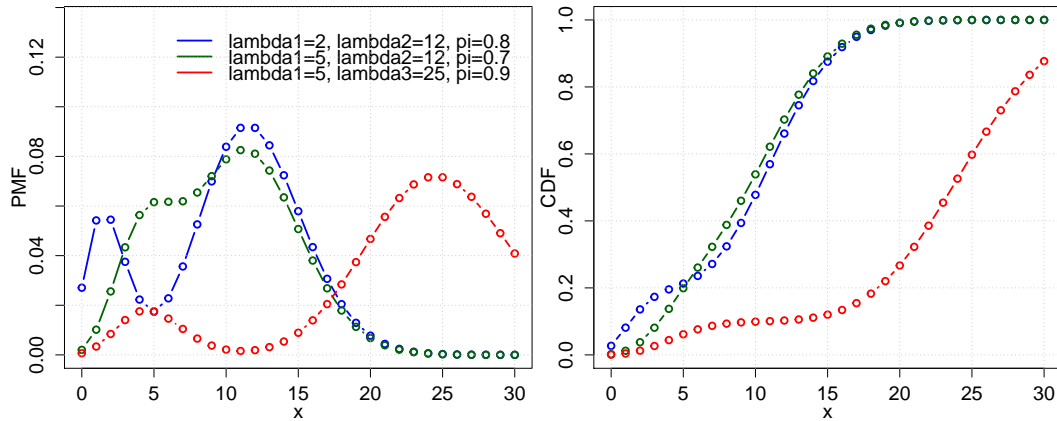

Figure 1.46: Example 1: PMF and CDF of the Mixture Poisson distribution plotted using the formula for for various values as shown in the legend of the left plot. The PMF reads:  $(1 - \pi_1) \lambda_1^k / k! \exp(-\lambda_1) + \pi_1 \lambda_2^k / k! \exp(-\lambda_2)$ . The CDF reads:  $(1 - \pi_1) \Gamma([k + 1, \lambda_1]) / [k]! + \pi_1 \Gamma([k + 1, \lambda_2]) / [k]!$ .

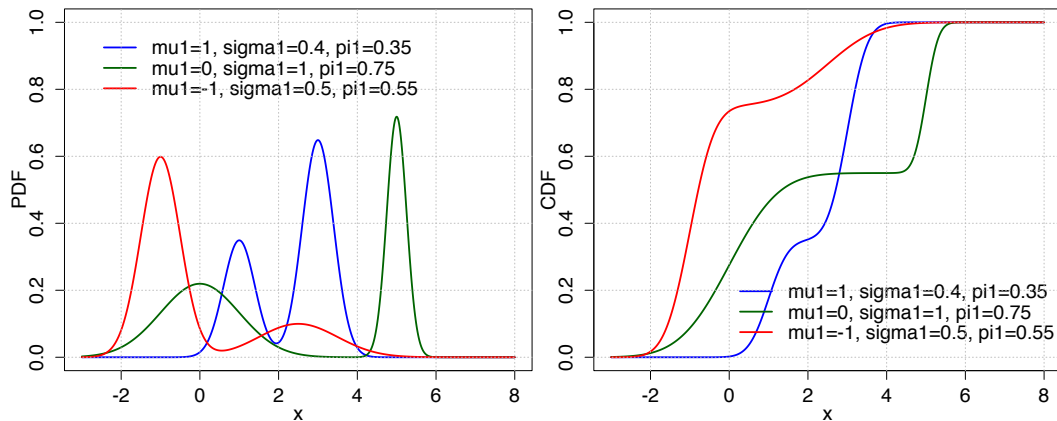

Figure 1.47: Example 2: PDF and CDF of the Mixture Normal distribution plotted using the formula for for various values as shown in the legend of the left plot. The PDF reads:  $(1 - \pi_1) \times 1 / (\sigma_1 \sqrt{2\pi}) \exp(-(x - \mu_1)^2 / (2\sigma_1^2)) + \pi_1 \times 1 / (\sigma_2 \sqrt{2\pi}) \exp(-(x - \mu_2)^2 / (2\sigma_2^2))$ . The CDF reads:  $(1 - \pi_1) \times 1/2(1 + erf((x - \mu_1) / (\sigma_1 \sqrt{2}))) + \pi_1 \times 1/2(1 + erf((x - \mu_2) / (\sigma_2 \sqrt{2})))$ .

**Functions**

**PDF**

$$f(x; \pi, \theta) = \sum_{i=1}^K \pi_i p_i(x; \theta_i) \text{ where } p_i(x; \theta_i) \text{ the PDF of the } i^{th} \text{ component with parameters } \theta_i$$

1415 **References**

[Forbes et al., 2011]  
[https://en.wikipedia.org/wiki/Mixture\\_distribution](https://en.wikipedia.org/wiki/Mixture_distribution)  
<http://www.uncertml.org/distributions/mixture-model>

**Multinomial1**

|      |                                                                                                                                                                                                                                        |
|------|----------------------------------------------------------------------------------------------------------------------------------------------------------------------------------------------------------------------------------------|
| 1420 | <p><b>name</b>            Multinomial 1 (ID: 0000654)</p> <p><b>type</b>            discrete</p> <p><b>variate</b>        <math>X</math>, vector</p> <p><b>support</b>        <math>X_i \in \{0, \dots, n\}, \Sigma X_i = n</math></p> |
|------|----------------------------------------------------------------------------------------------------------------------------------------------------------------------------------------------------------------------------------------|

**Model**

For  $n$  independent trials each of which leads to a success for exactly one of  $k$  categories, with each category having a given fixed success probability, the multinomial distribution gives the probability of any particular combination of numbers of successes for the various categories.

1425 **Parameter: numberOfTrials**

|                   |                           |
|-------------------|---------------------------|
| <b>name</b>       | number of trials          |
| <b>type</b>       | scalar                    |
| <b>symbol</b>     | $n$                       |
| <b>definition</b> | $n > 0, n \in \mathbb{N}$ |

**Parameter: probabilityOfSuccess**

|                   |                                 |
|-------------------|---------------------------------|
| <b>name</b>       | event probabilities             |
| <b>type</b>       | vector                          |
| <b>symbol</b>     | $p_1, \dots, p_k$               |
| <b>definition</b> | $p_1, \dots, p_k, \sum p_i = 1$ |

**Functions****PMF**

$$\frac{n!}{x_1! \cdots x_k!} p_1^{x_1} \cdots p_k^{x_k}$$

1430

**Characteristics****Mean**

$$E\{X_i\} = np_i$$

**Variance**

$$\text{Var}(X_i) = np_i(1 - p_i); \quad \text{Cov}(X_i, X_j) = -np_i p_j \quad (i \neq j)$$

**References**

[http://en.wikipedia.org/wiki/Multinomial\\_distribution](http://en.wikipedia.org/wiki/Multinomial_distribution)

<http://www.uncertml.org/distributions/multinomial>

1435 **MultivariateNormal1**

|                |                                           |
|----------------|-------------------------------------------|
| <b>name</b>    | Multivariate Normal 1 (ID: 0000719)       |
| <b>type</b>    | continuous                                |
| <b>variate</b> | $x$ , vector                              |
| <b>support</b> | $-\infty < x_i < \infty, i = 1, \dots, k$ |

**Parameter: mean**

|                   |                        |
|-------------------|------------------------|
| <b>name</b>       | location               |
| <b>type</b>       | vector                 |
| <b>symbol</b>     | $\mu$                  |
| <b>definition</b> | $\mu \in \mathbb{R}^k$ |

**Parameter: covarianceMatrix**

|                   |                                      |
|-------------------|--------------------------------------|
| <b>name</b>       | covariance matrix                    |
| <b>type</b>       | matrix                               |
| <b>symbol</b>     | $\Sigma$                             |
| <b>definition</b> | $\Sigma \in \mathbb{R}^{k \times k}$ |

1440

**Functions****PDF**

$$(2\pi)^{-\frac{k}{2}} |\Sigma|^{-\frac{1}{2}} e^{-\frac{1}{2}(x-\mu)'\Sigma^{-1}(x-\mu)}$$

**CDF**

no analytic expression

**Characteristics****Mean**

$$\mu$$

**Mode**

$$\mu$$

**Variance**

$$\Sigma$$

**References**

- 1445 [Forbes et al., 2011]  
[http://en.wikipedia.org/wiki/Multivariate\\_normal\\_distribution](http://en.wikipedia.org/wiki/Multivariate_normal_distribution)  
<http://www.uncertml.org/distributions/multivariate-normal>

**MultivariateNormal2**

**name** Multivariate Normal 2 (ID: 0000742)  
**type** continuous  
**variate**  $x$ , vector  
**support**  $x \in R^k$

1450 **Parameter: mean**

**name** location  
**type** vector  
**symbol**  $\mu$   
**definition**  $\mu \in R^k$

**Parameter: precisionMatrix**

**name** precision matrix  
**type** matrix  
**symbol**  $T$   
**definition** inverse of the covariance matrix

**Functions****PDF**

$$(2\pi)^{-d/2} |T|^{\frac{1}{2}} \exp\left(-\frac{1}{2}(x-\mu)'T(x-\mu)\right)$$

**CDF**

no analytic expression

1455

**Characteristics**

|                 |          |
|-----------------|----------|
| <b>Mean</b>     | $\mu$    |
| <b>Mode</b>     | $\mu$    |
| <b>Variance</b> | $T^{-1}$ |

**References**

[Spiegelhalter et al., 2003]

**MultivariateStudentT1**

|                |                                          |
|----------------|------------------------------------------|
| <b>name</b>    | Multivariate (Student) T 1 (ID: 0000790) |
| <b>type</b>    | continuous                               |
| <b>variate</b> | $x$ , vector                             |
| <b>support</b> | $x \in R^p$                              |

**Parameter: mean**

|                   |                                              |
|-------------------|----------------------------------------------|
| <b>name</b>       | location                                     |
| <b>type</b>       | vector                                       |
| <b>symbol</b>     | $\mu$                                        |
| <b>definition</b> | $\mu = [\mu_1, \dots, \mu_p]^T, \mu_i \in R$ |

**Parameter: scaleMatrix**

|                   |                                                       |
|-------------------|-------------------------------------------------------|
| <b>name</b>       | scale matrix                                          |
| <b>type</b>       | matrix                                                |
| <b>symbol</b>     | $\Sigma$                                              |
| <b>definition</b> | $\Sigma$ , positive-definite real $p \times p$ matrix |

**Parameter: degreesOfFreedom**

|                   |                    |
|-------------------|--------------------|
| <b>name</b>       | degrees of freedom |
| <b>type</b>       | scalar             |
| <b>symbol</b>     | $\nu$              |
| <b>definition</b> | $\nu \geq 2$       |

**Functions****PDF**

$$\frac{\Gamma[(\nu + p)/2]}{\Gamma(\nu/2)\nu^{p/2}\pi^{p/2}|\Sigma|^{1/2} \left[1 + \frac{1}{\nu}(x - \mu)^T \Sigma^{-1}(x - \mu)\right]^{(\nu+p)/2}}$$

**CDF**

no analytic expression

**Characteristics**

|                 |                                                                                                             |
|-----------------|-------------------------------------------------------------------------------------------------------------|
| <b>Mean</b>     | $\begin{cases} \mu & \text{for } \nu > 1 \\ \text{undefined} & \text{else} \end{cases}$                     |
| <b>Median</b>   | $\mu$                                                                                                       |
| <b>Mode</b>     | $\mu$                                                                                                       |
| <b>Variance</b> | $\begin{cases} \frac{\nu}{\nu-2}\Sigma & \text{for } \nu > 2 \\ \text{undefined} & \text{else} \end{cases}$ |

**1470 References**

[http://en.wikipedia.org/wiki/Multivariate\\_t-distribution](http://en.wikipedia.org/wiki/Multivariate_t-distribution)  
<http://www.uncertml.org/distributions/multivariate-student-t>

**MultivariateStudentT2**

|                 |                                          |
|-----------------|------------------------------------------|
| <b>name</b>     | Multivariate (Student) T 2 (ID: 0000016) |
| <b>type</b>     | continuous                               |
| <b>variante</b> | $x$ , vector                             |
| <b>support</b>  | $x \in R^d, k \geq 2$                    |

**1475 Parameter: mean**

|                   |                                              |
|-------------------|----------------------------------------------|
| <b>name</b>       | location                                     |
| <b>type</b>       | vector                                       |
| <b>symbol</b>     | $\mu$                                        |
| <b>definition</b> | $\mu = [\mu_1, \dots, \mu_d]^T, \mu_i \in R$ |

**Parameter: precisionMatrix**

|                   |                                  |
|-------------------|----------------------------------|
| <b>name</b>       | precision matrix                 |
| <b>type</b>       | matrix                           |
| <b>symbol</b>     | $T$                              |
| <b>definition</b> | Inverse of the covariance matrix |

**Parameter: degreesOfFreedom**

|                    |                    |
|--------------------|--------------------|
| <b>name</b>        | degrees of freedom |
| <b>type</b>        | scalar             |
| <b>1480 symbol</b> | $k$                |
| <b>definition</b>  | $k \geq 2$         |

**Functions****PDF**

$$\frac{\Gamma((k+d)/2)}{\Gamma(k/2)k^{d/2}\pi^{d/2}}|T|^{1/2}\left[1 + \frac{1}{k}(x-\mu)'T(x-\mu)\right]^{-(k+d)/2}$$

**References**

[Spiegelhalter et al., 2003]

1485 **Nakagami1**

**name** Nakagami 1 (ID: 0000041)  
**type** continuous  
**variate**  $x$ , scalar  
**support**  $x \in (0, +\infty)$

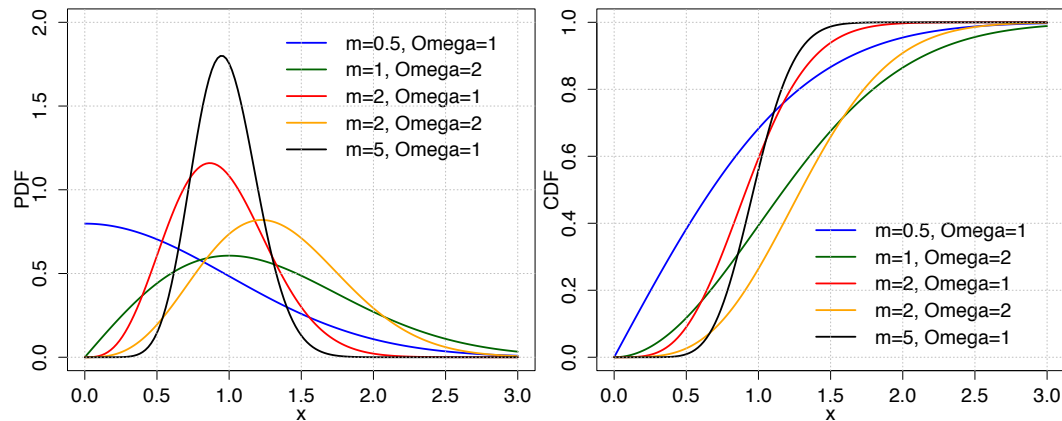

Figure 1.48: Nakagami1 distribution plotted using the provided R code.

**Parameter: shape**

**name** shape  
**type** scalar  
**symbol**  $m$   
**definition**  $m > 0$

**Parameter: spread**

**name** spread  
**type** scalar  
**symbol**  $\Omega$   
**definition**  $\Omega > 0$

1490

**Functions****PDF**

$$\frac{2m^m}{\Gamma(m)\Omega^m} x^{2m-1} \exp\left(-\frac{m}{\omega} x^2\right)$$

**PDF in R**

$2*m^m / (\text{gamma}(m)*\text{Omega}^m)*x^{(2*m-1)}*\exp(-m/\text{Omega}*x^2)$

**CDF**

$$\frac{\gamma\left(m, \frac{m}{\Omega} x^2\right)}{\Gamma(m)}$$

**CDF in R**

1495  $\text{Igamma}(m, m/\text{Omega}*x^2, \text{lower=T})/\text{gamma}(m)$

**Characteristics**

Mean

$$\frac{\Gamma(m + \frac{1}{2})}{\Gamma(m)} \left(\frac{\Omega}{m}\right)^{\frac{1}{2}}$$

Median

$$\sqrt{\Omega}$$

Mode

$$\frac{\sqrt{2}}{2} \left(\frac{(2m - 1)\Omega}{m}\right)^{1/2}$$

Variance

$$\Omega \left(1 - \frac{1}{m} \left(\frac{\Gamma(m + \frac{1}{2})}{\Gamma(m)}\right)^2\right)$$

**References**

[https://en.wikipedia.org/wiki/Nakagami\\_distribution](https://en.wikipedia.org/wiki/Nakagami_distribution)

## NegativeBinomial1

1500

**name** Negative Binomial 1 (ID: 0000074)  
**type** discrete  
**variate**  $k$ , scalar  
**support**  $k \in \{0, 1, 2, 3, \dots\}$  – number of failures

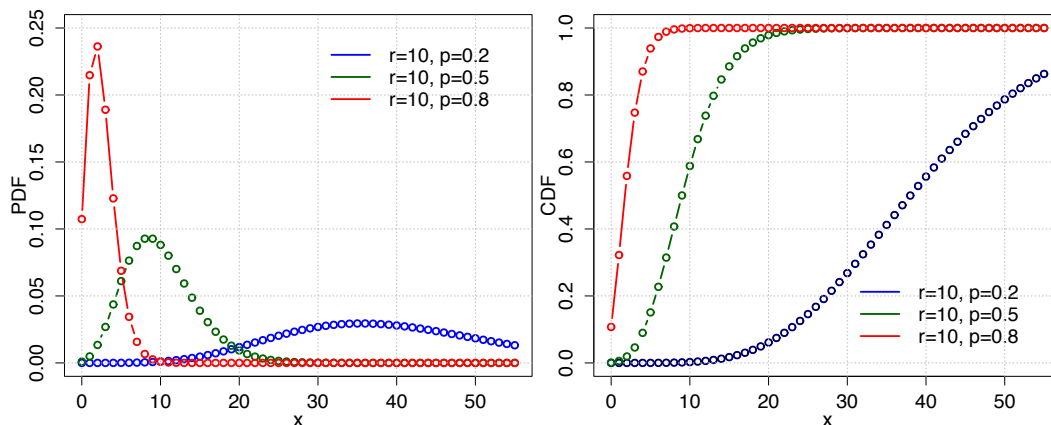

Figure 1.49: NegativeBinomial1 distribution plotted using the provided R code.

**Model**

Negative Binomial 1 distribution is a discrete probability distribution of the number of failures before the  $r$ th success in repeated mutually independent Bernoulli trials, each with probability of success  $p$ . (Compare Negative Binomial 4.)

1505

**Parameter: numberOfSuccesses**

**name** number of successes  
**type** scalar  
**symbol**  $r$   
**definition**  $r > 0, r \in \mathbb{N}$

**Parameter: probability**

**name** success probability  
**type** scalar  
**symbol**  $p$   
**definition**  $p \in (0, 1)$

**Functions****PMF**

$$\binom{k+r-1}{k} p^r (1-p)^k$$

1510 **PMF in R**

```
choose(k+r-1,k) * p^r * (1-p)^k
```

**CDF**

$$1 - I_{1-p}(k+1, r)$$

**CDF in R**

```
1 - Rbeta(1-p, k+1, r, lower = T)
```

**Characteristics****Mean**

$$\frac{r(1-p)}{p}$$

**Mode**

$$\lfloor \frac{(1-p)(r-1)}{p} \rfloor$$

**Variance**

$$\frac{r(1-p)}{p^2}$$

1515 **Relationships**

- Relationship pair: *NegativeBinomial1*( $r, p$ )  $\rightarrow$  *NegativeBinomial5*( $\alpha, \beta$ )
- Relationship type: Reparameterisation
- Relationship definition:  $\alpha = r, \beta = p/(1-p)$
- Relationship pair: *NegativeBinomial1*( $r, p$ )  $\rightarrow$  *NegativeBinomial4*( $r, p$ )
- 1520 - Relationship type: Reparameterisation
- Relationship definition:  $p = 1-p$
- Relationship pair: *NegativeBinomial1*( $r, p$ )  $\rightarrow$  *Geometric1*( $p$ )
- Relationship type: Special case
- Relationship definition:  $n = 1$
- 1525 - Relationship pair: *NegativeBinomial1*( $r, p$ )  $\rightarrow$  *Normal1*( $\mu, \sigma$ )
- Relationship type:
- Relationship definition:  $\mu = n(1-p), n \rightarrow \infty$
- Relationship pair: *NegativeBinomial1*( $r, p$ )  $\rightarrow$  *Poisson1*( $\lambda$ )
- Relationship type:
- 1530 - Relationship definition:  $\mu = np, n \rightarrow \infty$
- Relationship pair: *NegativeBinomial1*( $r, p$ )  $\rightarrow$  *NegativeBinomial3*( $\mu, \phi$ )
- Relationship type: Reparameterisation
- Relationship definition:  $\phi = r, \mu = r(1-p)/p$
- Relationship pair: *NegativeBinomial1*( $r, p$ )  $\rightarrow$  *NegativeBinomial2*( $\lambda, \tau$ )
- 1535 - Relationship type: Reparameterisation
- Relationship definition:  $\tau = 1/r, \lambda = r(1-p)/p$
- Relationship pair: *NegativeBinomial5*( $\alpha, \beta$ )  $\rightarrow$  *NegativeBinomial1*( $r, p$ )
- Relationship type: Reparameterisation
- Relationship definition:  $r = \alpha, p = \beta/(1+\beta)$
- 1540 - Relationship pair: *NegativeBinomial4*( $r, p$ )  $\rightarrow$  *NegativeBinomial1*( $r, p$ )
- Relationship type: Reparameterisation
- Relationship definition:  $p = 1-p$
- Relationship pair: *Geometric1*( $p$ )  $\rightarrow$  *NegativeBinomial1*( $r, p$ )



- Relationship type: Transformation
- 1545 - Relationship definition:  $\Sigma X(iid)$
- Relationship pair:  $NegativeBinomial3(\mu, \phi) \rightarrow NegativeBinomial1(r, p)$
- Relationship type: Reparameterisation
- Relationship definition:  $r = \phi, p = r/(\mu + r)$
- Relationship pair:  $NegativeBinomial2(\lambda, \tau) \rightarrow NegativeBinomial1(r, p)$
- 1550 - Relationship type: Reparameterisation
- Relationship definition:  $r = 1/\tau, p = 1/(1 + \tau\lambda)$
- Relationship pair:  $ConwayMaxwellPoisson1(\lambda, \nu) \rightarrow NegativeBinomial1(r, p)$
- Relationship type: Transformation
- Relationship definition: For  $\nu = 0$  and  $\lambda < 1$  the sum of Conway-Maxwell-Poisson distributed variables
- 1555 reduces to the sum of geometric variables, which follows a Negative Binomial distribution with parameters  $n$  and  $1 - \lambda$

**References**

[Shmueli et al., 2005], [Leemis and Mcqueston, 2008]  
<http://www.math.wm.edu/~leemis/chart/UDR/PDFs/PascalGeometric.pdf>  
 1560 <http://www.math.wm.edu/~leemis/chart/UDR/PDFs/GeometricPascal.pdf>  
<http://www.math.wm.edu/~leemis/chart/UDR/PDFs/PascalNormal.pdf>  
<http://www.math.wm.edu/~leemis/chart/UDR/PDFs/PascalPoisson.pdf>

## NegativeBinomial2

**name** Negative Binomial 2 (ID: 0000105)  
**type** discrete  
**variate**  $k$ , scalar  
**support**  $k \in \{0, 1, 2, 3, \dots\}$

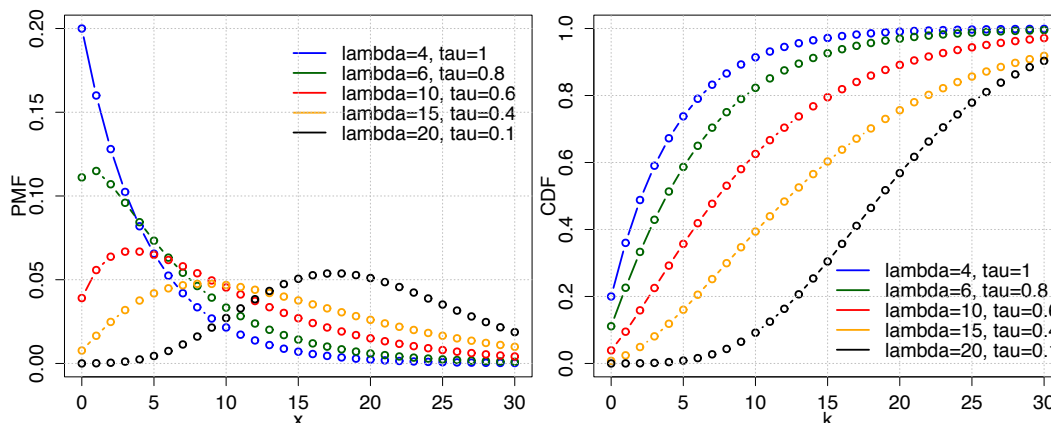

Figure 1.50: NegativeBinomial2 distribution plotted using the provided R code.

1565 **Parameter: rate**

**name** Poisson intensity  
**type** scalar  
**symbol**  $\lambda$   
**definition**  $\lambda \in R, \lambda > 0$

**Parameter: overdispersion**

**name** overdispersion  
**type** scalar  
**symbol**  $\tau$   
**definition**  $\tau \in R$

**Functions****PMF**

$$\frac{\Gamma(k + \frac{1}{\tau})}{k! \Gamma(\frac{1}{\tau})} \left(\frac{1}{1 + \tau\lambda}\right)^{\frac{1}{\tau}} \left(\frac{\lambda}{\frac{1}{\tau} + \lambda}\right)^k$$

1570 **PMF in R**

```
gamma(k + 1/tau)/(factorial(k) * gamma(1/tau)) * 1/(1+tau*lambda)^(1/tau) *
(lambda/(1/tau + lambda))^k
```

**CDF**

$$\sum_{i=1}^x f(i), x \in \{0, 1, 2, \dots\} \text{ with } f \text{ the PMF}$$

**CDF in R**

```
cumsum(PMF)
```

1575 **Characteristics****Mean**

$$\lambda$$

**Variance**

$$\lambda(1 + \tau\lambda)$$

**Relationships**

- Relationship pair: *NegativeBinomial2*( $\lambda, \tau$ )  $\rightarrow$  *NegativeBinomial5*( $\alpha, \beta$ )
- Relationship type: Reparameterisation
- Relationship definition:  $\alpha = 1/\tau, \beta = 1/(\tau\lambda)$
- 1580 - Relationship pair: *NegativeBinomial2*( $\lambda, \tau$ )  $\rightarrow$  *NegativeBinomial4*( $r, p$ )
- Relationship type: Reparameterisation
- Relationship definition:  $r = 1/\tau, p = \frac{\tau\lambda}{1+\tau\lambda}$
- Relationship pair: *NegativeBinomial2*( $\lambda, \tau$ )  $\rightarrow$  *NegativeBinomial3*( $\mu, \phi$ )
- Relationship type: Reparameterisation
- 1585 - Relationship definition:  $\mu = \lambda, \phi = 1/\tau$
- Relationship pair: *NegativeBinomial2*( $\lambda, \tau$ )  $\rightarrow$  *NegativeBinomial1*( $r, p$ )
- Relationship type: Reparameterisation
- Relationship definition:  $r = 1/\tau, p = 1/(1 + \tau\lambda)$
- Relationship pair: *NegativeBinomial5*( $\alpha, \beta$ )  $\rightarrow$  *NegativeBinomial2*( $\lambda, \tau$ )
- 1590 - Relationship type: Reparameterisation
- Relationship definition:  $\lambda = \alpha/\beta, \tau = 1/\alpha$
- Relationship pair: *ZeroInflatedNegativeBinomial1*( $\lambda, \tau, p0$ )  $\rightarrow$  *NegativeBinomial2*( $\lambda, \tau$ )
- Relationship type: Special case
- Relationship definition:  $p0 = 0$
- 1595 - Relationship pair: *NegativeBinomial4*( $r, p$ )  $\rightarrow$  *NegativeBinomial2*( $\lambda, \tau$ )
- Relationship type: Reparameterisation
- Relationship definition:  $\tau = 1/r, \lambda = \frac{rp}{1-p}$
- Relationship pair: *NegativeBinomial3*( $\mu, \phi$ )  $\rightarrow$  *NegativeBinomial2*( $\lambda, \tau$ )
- Relationship type: Reparameterisation
- 1600 - Relationship definition:  $\lambda = \mu, \tau = 1/\phi$
- Relationship pair: *NegativeBinomial1*( $r, p$ )  $\rightarrow$  *NegativeBinomial2*( $\lambda, \tau$ )
- Relationship type: Reparameterisation
- Relationship definition:  $\tau = 1/r, \lambda = r(1 - p)/p$

**References**

- 1605 [Trocóniz et al., 2009], [Cameron and Trivedi, 2013], [Hilbe, 2011]

## NegativeBinomial3

**name** Negative Binomial 3 (ID: 0000135)  
**type** discrete  
**variate**  $k$ , scalar  
**support**  $k \in \{0, 1, 2, 3, \dots\}$

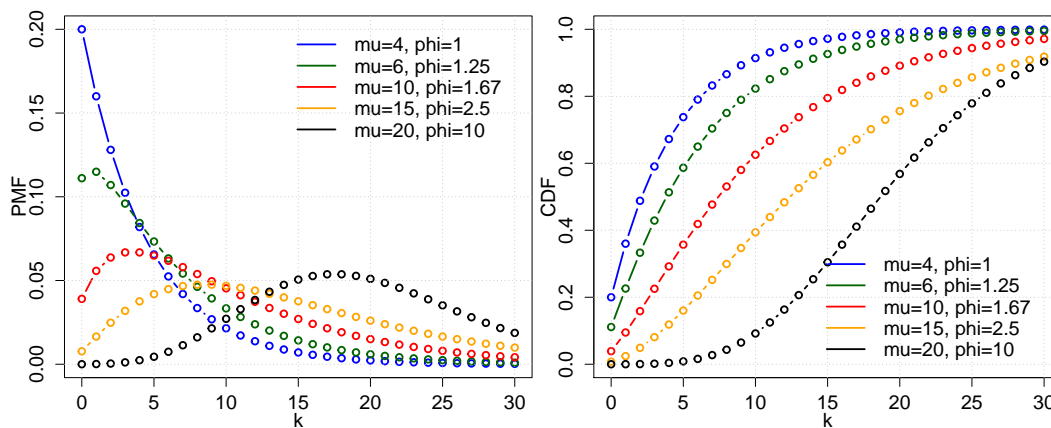

Figure 1.51: NegativeBinomial3 distribution plotted using the provided R code.

### Parameter: mean

**name** mean  
**type** scalar  
**symbol**  $\mu$   
**definition**  $\mu \in R, \mu > 0$

1610 **Parameter: dispersion**

**name** index parameter  
**type** scalar  
**symbol**  $\phi$   
**definition**  $\phi \in R, \phi > 0$

### Functions

#### PMF

$$\binom{k + \phi - 1}{k} \left(\frac{\phi}{\mu + \phi}\right)^\phi \left(\frac{\mu}{\mu + \phi}\right)^k$$

#### PMF in R

`choose(k+phi-1,k) * (phi / (mu + phi))^phi * (mu / (mu + phi))^k`

#### CDF

–

1615

### Characteristics

#### Mean

$$\mu$$

#### Variance

$$\mu + \mu^2/\phi$$

**Relationships**

- Relationship pair:  $NegativeBinomial3(\mu, \phi) \rightarrow NegativeBinomial5(\alpha, \beta)$
- Relationship type: Reparameterisation
- 1620 - Relationship definition:  $\alpha = \phi, \beta = \phi/\mu$
- Relationship pair:  $NegativeBinomial3(\mu, \phi) \rightarrow NegativeBinomial4(r, p)$
- Relationship type: Reparameterisation
- Relationship definition:  $r = \phi, p = \mu/(\phi + \mu)$
- Relationship pair:  $NegativeBinomial3(\mu, \phi) \rightarrow NegativeBinomial1(r, p)$
- 1625 - Relationship type: Reparameterisation
- Relationship definition:  $r = \phi, p = r/(\mu + r)$
- Relationship pair:  $NegativeBinomial3(\mu, \phi) \rightarrow NegativeBinomial2(\lambda, \tau)$
- Relationship type: Reparameterisation
- Relationship definition:  $\lambda = \mu, \tau = 1/\phi$
- 1630 - Relationship pair:  $NegativeBinomial5(\alpha, \beta) \rightarrow NegativeBinomial3(\mu, \phi)$
- Relationship type: Reparameterisation
- Relationship definition:  $\mu = \alpha/\beta, \phi = \alpha$
- Relationship pair:  $NegativeBinomial4(r, p) \rightarrow NegativeBinomial3(\mu, \phi)$
- Relationship type: Reparameterisation
- 1635 - Relationship definition:  $\phi = r, \mu = rp/(1 - p)$
- Relationship pair:  $NegativeBinomial1(r, p) \rightarrow NegativeBinomial3(\mu, \phi)$
- Relationship type: Reparameterisation
- Relationship definition:  $\phi = r, \mu = r(1 - p)/p$
- Relationship pair:  $NegativeBinomial2(\lambda, \tau) \rightarrow NegativeBinomial3(\mu, \phi)$
- 1640 - Relationship type: Reparameterisation
- Relationship definition:  $\mu = \lambda, \phi = 1/\tau$

**References**

[STAN Development Team, 2015]  
[cran.r-project.org/web/packages/VGAM/VGAM.pdf](http://cran.r-project.org/web/packages/VGAM/VGAM.pdf)

1645 **NegativeBinomial4**

**name** Negative Binomial 4 (ID: 0000161)  
**type** discrete  
**variate**  $k$ , scalar  
**support**  $k \in \{0, 1, 2, 3, \dots\}$  – number of successes

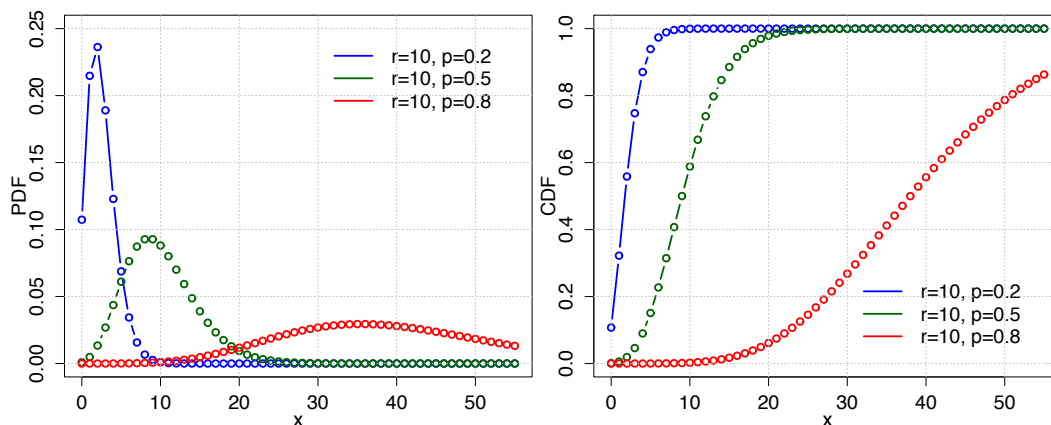

Figure 1.52: NegativeBinomial4 distribution plotted using the provided R code.

**Model**

Negative Binomial 4 distribution is a discrete probability distribution of the number of successes in a sequence of independent and identically distributed Bernoulli trials before a specified (non-random) number of failures  $r$  occurs. (Compare Negative Binomial 1.)

**Parameter: numberOfFailures**

|                   |                           |
|-------------------|---------------------------|
| <b>name</b>       | number of failures        |
| <b>type</b>       | scalar                    |
| <b>symbol</b>     | $r$                       |
| <b>definition</b> | $r > 0, r \in \mathbb{N}$ |

**Parameter: probability**

|                   |                     |
|-------------------|---------------------|
| <b>name</b>       | success probability |
| <b>type</b>       | scalar              |
| <b>symbol</b>     | $p$                 |
| <b>definition</b> | $p \in (0, 1)$      |

**Functions****PMF**

$$\binom{k+r-1}{k} (1-p)^r p^k$$

**PMF in R**

```
choose(k+r-1,k) * (1-p)^r * p^k
```

**CDF**

$$1 - I_p(k+1, r)$$

**CDF in R**

```
1 - Rbeta(p, k+1, r, lower = T)
```

**Characteristics****Mean**

$$\frac{pr}{1-p}$$

**Mode**

$$\begin{cases} \lfloor \frac{p(r-1)}{1-p} \rfloor & \text{for } r > 1 \\ 0 & \text{for } r \leq 1 \end{cases}$$

**Variance**

$$\frac{pr}{(1-p)^2}$$

**Relationships**

- Relationship pair:  $NegativeBinomial4(r, p) \rightarrow NegativeBinomial2(\lambda, \tau)$
- Relationship type: Reparameterisation
- Relationship definition:  $\tau = 1/r, \lambda = \frac{rp}{1-p}$
- Relationship pair:  $NegativeBinomial4(r, p) \rightarrow NegativeBinomial1(r, p)$
- Relationship type: Reparameterisation
- Relationship definition:  $p = 1 - p$
- Relationship pair:  $NegativeBinomial4(r, p) \rightarrow NegativeBinomial5(\alpha, \beta)$
- Relationship type: Reparameterisation
- Relationship definition:  $\alpha = r, \beta = (1-p)/p$
- Relationship pair:  $NegativeBinomial4(r, p) \rightarrow NegativeBinomial3(\mu, \phi)$
- Relationship type: Reparameterisation

- Relationship definition:  $\phi = r, \mu = rp/(1 - p)$
- Relationship pair:  $NegativeBinomial2(\lambda, \tau) \rightarrow NegativeBinomial4(r, p)$
- 1675 - Relationship type: Reparameterisation
- Relationship definition:  $r = 1/\tau, p = \frac{\tau\lambda}{1+\tau\lambda}$
- Relationship pair:  $NegativeBinomial1(r, p) \rightarrow NegativeBinomial4(r, p)$
- Relationship type: Reparameterisation
- Relationship definition:  $p = 1 - p$
- 1680 - Relationship pair:  $GeneralizedNegativeBinomial1(\theta, \beta, m) \rightarrow NegativeBinomial4(r, p)$
- Relationship type:
- Relationship definition:  $\beta = 1$  and set  $m = r, \theta = p$
- Relationship pair:  $NegativeBinomial5(\alpha, \beta) \rightarrow NegativeBinomial4(r, p)$
- Relationship type: Reparameterisation
- 1685 - Relationship definition:  $r = \alpha, p = 1/(1 + \beta)$
- Relationship pair:  $NegativeBinomial3(\mu, \phi) \rightarrow NegativeBinomial4(r, p)$
- Relationship type: Reparameterisation
- Relationship definition:  $r = \phi, p = \mu/(\phi + \mu)$

**References**

- 1690 [Cameron and Trivedi, 2013], [Consul and Famoye, 2006]
- [https://en.wikipedia.org/wiki/Binomial\\_distribution](https://en.wikipedia.org/wiki/Binomial_distribution)
- <http://www.uncertml.org/distributions/negative-binomial>

## NegativeBinomial5

**name** Negative Binomial 5 (ID: 0000190)  
**type** discrete  
**variate**  $k$ , scalar  
**support**  $k \in \{0, 1, 2, 3, \dots\}$

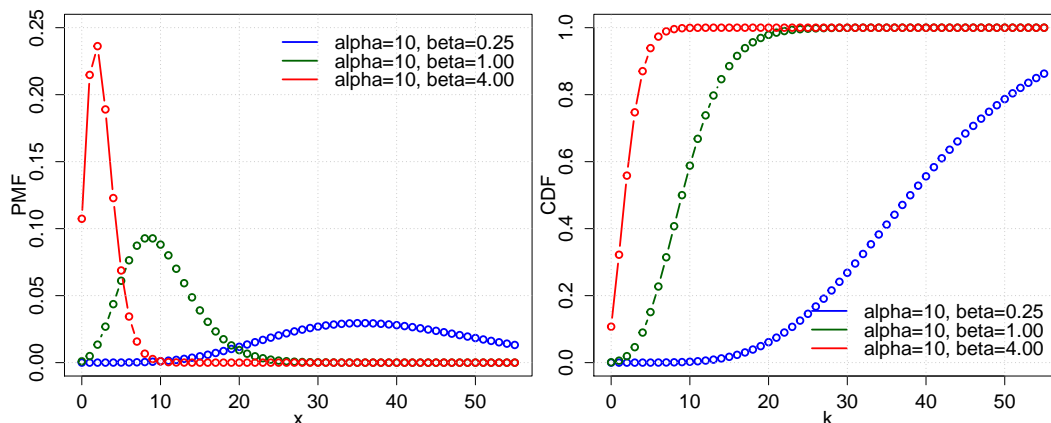

Figure 1.53: NegativeBinomial5 distribution plotted using the provided R code.

1695 **Parameter: shape**

**name** shape  
**type** scalar  
**symbol**  $\alpha$   
**definition**  $\alpha \in R^+$

**Parameter: inverseScale**

**name** inverse scale  
**type** scalar  
**symbol**  $\beta$   
**definition**  $\beta \in R^+$

**Functions****PMF**

$$\binom{k + \alpha - 1}{\alpha - 1} \left(\frac{\beta}{\beta + 1}\right)^\alpha \left(\frac{1}{\beta + 1}\right)^k$$

1700 **PMF in R**

```
choose(k+alpha-1,alpha-1) * (beta / (beta + 1))^alpha * (1 / (beta + 1))^k
```

**CDF**

$$\sum_{i=1}^x f(i), x \in \{0, 1, 2, \dots\} \text{ with } f \text{ the PMF}$$

**CDF in R**

```
cumsum(PMF)
```

**Characteristics****Mean**

$$\alpha/\beta$$

**Variance**

$$\alpha/\beta^2(\beta + 1)$$

1705 **Relationships**

- Relationship pair:  $NegativeBinomial5(\alpha, \beta) \rightarrow NegativeBinomial2(\lambda, \tau)$
- Relationship type: Reparameterisation
- Relationship definition:  $\lambda = \alpha/\beta, \tau = 1/\alpha$
- Relationship pair:  $NegativeBinomial5(\alpha, \beta) \rightarrow NegativeBinomial3(\mu, \phi)$
- 1710 - Relationship type: Reparameterisation
- Relationship definition:  $\mu = \alpha/\beta, \phi = \alpha$
- Relationship pair:  $NegativeBinomial5(\alpha, \beta) \rightarrow NegativeBinomial1(r, p)$
- Relationship type: Reparameterisation
- Relationship definition:  $r = \alpha, p = \beta/(1 + \beta)$
- 1715 - Relationship pair:  $NegativeBinomial5(\alpha, \beta) \rightarrow NegativeBinomial4(r, p)$
- Relationship type: Reparameterisation
- Relationship definition:  $r = \alpha, p = 1/(1 + \beta)$
- Relationship pair:  $NegativeBinomial2(\lambda, \tau) \rightarrow NegativeBinomial5(\alpha, \beta)$
- Relationship type: Reparameterisation
- 1720 - Relationship definition:  $\alpha = 1/\tau, \beta = 1/(\tau\lambda)$
- Relationship pair:  $NegativeBinomial3(\mu, \phi) \rightarrow NegativeBinomial5(\alpha, \beta)$
- Relationship type: Reparameterisation
- Relationship definition:  $\alpha = \phi, \beta = \phi/\mu$
- Relationship pair:  $NegativeBinomial1(r, p) \rightarrow NegativeBinomial5(\alpha, \beta)$
- 1725 - Relationship type: Reparameterisation
- Relationship definition:  $\alpha = r, \beta = p/(1 - p)$
- Relationship pair:  $NegativeBinomial4(r, p) \rightarrow NegativeBinomial5(\alpha, \beta)$
- Relationship type: Reparameterisation
- Relationship definition:  $\alpha = r, \beta = (1 - p)/p$

1730 **References**

[Gelman et al., 2014]

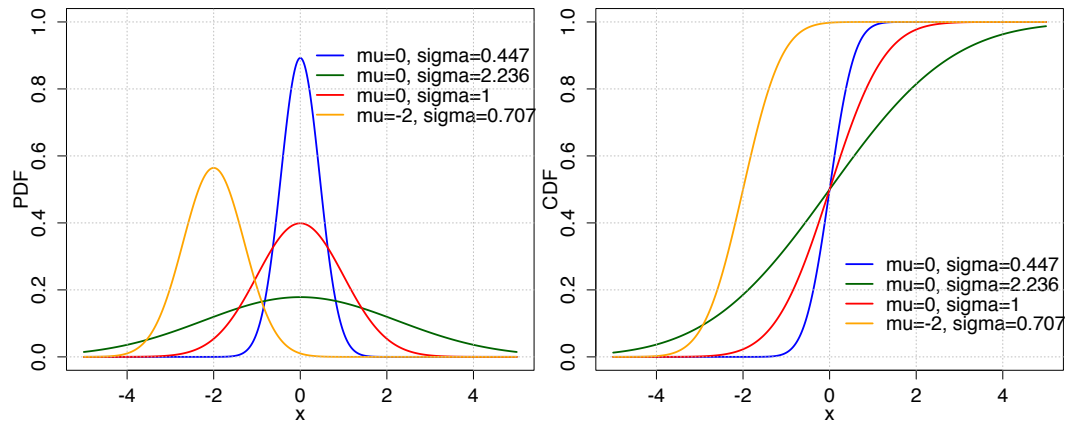

Figure 1.54: Normal1 distribution plotted using the provided R code.

## Normal1

**name** Normal 1 (ID: 0000239)  
**type** continuous  
**variate**  $x$ , scalar  
**support**  $x \in R$

### Parameter: mean

**name** mean  
**type** scalar  
**symbol**  $\mu$   
**definition**  $\mu \in R$

### Parameter: stdev

**name** standard deviation  
**type** scalar  
**symbol**  $\sigma$   
**definition**  $\sigma > 0$

### Functions

#### PDF

$$\frac{1}{\sigma\sqrt{2\pi}} e^{-\frac{(x-\mu)^2}{2\sigma^2}}$$

#### PDF in R

1740 `1/(sigma*sqrt(2*pi))*exp(-(x-mu)^2/(2*sigma^2))`

#### CDF

$$\frac{1}{2} \left[ 1 + \operatorname{erf} \left( \frac{x - \mu}{\sigma\sqrt{2}} \right) \right]$$

#### CDF in R

`1/2 * (1 + erf((x-mu)/(sigma*sqrt(2))))`

### Characteristics

#### Mean

$$\mu$$

#### Median

$$\mu$$



**Mode** $\mu$ **Variance** $\sigma^2$ **Relationships**

- 1745 - Relationship pair:  $Normal1(\mu, \sigma) \rightarrow LogNormal1(\mu, \sigma)$   
 - Relationship type: Transformation  
 - Relationship definition:  $\exp(X)$   
 - Relationship pair:  $Normal1(\mu, \sigma) \rightarrow StandardNormal1(0, 1)$   
 - Relationship type: Special case  
 1750 - Relationship definition:  $\mu = 0, \sigma = 1$   
 - Relationship pair:  $Normal1(\mu, \sigma) \rightarrow Normal2(\mu, v)$   
 - Relationship type: Reparameterisation  
 - Relationship definition:  $\mu = \mu, v = \sigma^2$   
 - Relationship pair:  $Normal1(\mu, \sigma) \rightarrow Normal3(\mu, \tau)$   
 1755 - Relationship type: Reparameterisation  
 - Relationship definition:  $\mu = \mu, \tau = 1/\sigma^2$   
 - Relationship pair:  $Normal1(\mu, \sigma) \rightarrow StandardNormal1(0, 1)$   
 - Relationship type: Transformation  
 - Relationship definition:  $X \sim Normal1(\mu, \sigma); Y = (X - \mu)/\sigma; Y \sim StandardNormal1$   
 1760 - Relationship pair:  $Normal1(\mu, \sigma) \rightarrow ChiSquared1(n)$   
 - Relationship type: Transformation  
 - Relationship definition: If  $X_i \sim N(\mu, \sigma), i = 1, 2, \dots, n$  are mutually independent and identically distributed random variables and  $Y = \sum_{i=1}^n ((X_i - \mu)/\sigma)^2 \Rightarrow Y \sim ChiSquared1(n)$   
 - Relationship pair:  $Poisson1(\lambda) \rightarrow Normal1(\mu, \sigma)$   
 1765 - Relationship type: Transformation & Limiting  
 - Relationship definition:  $\sigma^2 = \lambda, \mu = \lambda, \lambda \rightarrow \infty$   
 - Relationship pair:  $LogNormal1(\mu, \sigma) \rightarrow Normal1(\mu, \sigma)$   
 - Relationship type: Transformation  
 - Relationship definition:  $\log(X)$   
 1770 - Relationship pair:  $Normal2(\mu, v) \rightarrow Normal1(\mu, \sigma)$   
 - Relationship type: Reparameterisation  
 - Relationship definition:  $\mu = \mu, \sigma = \sqrt{v}$   
 - Relationship pair:  $TruncatedNormal1(\mu, \sigma, a, b) \rightarrow Normal1(\mu, \sigma)$   
 - Relationship type: Special case  
 1775 - Relationship definition:  $a = -\infty, b = \infty$   
 - Relationship pair:  $Normal3(\mu, \tau) \rightarrow Normal1(\mu, \sigma)$   
 - Relationship type: Reparameterisation  
 - Relationship definition:  $\mu = \mu, \sigma = 1/\sqrt{\tau}$   
 - Relationship pair:  $Binomial1(n, p) \rightarrow Normal1(\mu, \sigma)$   
 1780 - Relationship type: Limiting  
 - Relationship definition: For  $X \sim Binomial1(n, p)$  as  $n \rightarrow \infty, X$  is approximately normally distributed  $Normal1(\mu, \sigma)$  with  $\mu = np, \sigma = np(1 - p)$ .  
 - Relationship pair:  $StandardNormal1(0, 1) \rightarrow Normal1(\mu, \sigma)$   
 - Relationship type: Transformation  
 1785 - Relationship definition:  $X \sim StandardNormal1$  and  $Y = \mu + \sigma X \Rightarrow Y \sim Normal1$   
 - Relationship pair:  $NegativeBinomial1(r, p) \rightarrow Normal1(\mu, \sigma)$   
 - Relationship type:  
 - Relationship definition:  $\mu = n(1 - p), n \rightarrow \infty$   
 - Relationship pair:  $Gamma1(k, theta) \rightarrow Normal1(\mu, \sigma)$   
 1790 - Relationship type: Special case & Limiting  
 - Relationship definition:  $\mu = k\theta, \sigma^2 = k^2\theta, \theta \rightarrow \infty$   
 - Relationship pair:  $Beta1(alpha, beta) \rightarrow Normal1(\mu, \sigma)$   
 - Relationship type: Special case & Limiting

- Relationship definition:  $\alpha = \beta, \beta \rightarrow \infty$

1795 - Relationship pair:  $Hypergeometric1(N, K, n) \rightarrow Normal1(\mu, \sigma)$

- Relationship type: Limiting

- Relationship definition:  $X \sim Hypergeometric1(N, K, n) \Rightarrow Y \sim Normal1(\mu, \sigma)$  for large n, but K/N not too small

**References**

[Leemis and Mcqueston, 2008], [Forbes et al., 2011]

1800 [http://en.wikipedia.org/wiki/Normal\\_distribution](http://en.wikipedia.org/wiki/Normal_distribution)

<http://www.uncertml.org/distributions/normal>

<http://www.math.wm.edu/~leemis/chart/UDR/PDFs/PoissonNormal.pdf>

<http://www.math.wm.edu/~leemis/chart/UDR/PDFs/NormalLognormal.pdf>

<http://www.math.wm.edu/~leemis/chart/UDR/PDFs/NormalChisquare.pdf>

1805 <http://www.math.wm.edu/~leemis/chart/UDR/PDFs/LognormalNormal.pdf>

<http://www.math.wm.edu/~leemis/chart/UDR/PDFs/NormalStandardnormalT.pdf>

<http://www.math.wm.edu/~leemis/chart/UDR/PDFs/StandardnormalNormal.pdf>

<http://www.math.wm.edu/~leemis/chart/UDR/PDFs/NormalStandardnormalT.pdf>

<http://www.math.wm.edu/~leemis/chart/UDR/PDFs/GammaNormal1.pdf>

1810 <http://www.math.wm.edu/~leemis/chart/UDR/PDFs/BetaNormal.pdf>

<http://www.math.wm.edu/~leemis/chart/UDR/PDFs/PascalNormal.pdf>

<http://www.math.wm.edu/~leemis/chart/UDR/PDFs/BinomialNormal.pdf>

<http://www.math.wm.edu/~leemis/chart/UDR/PDFs/NormalChisquare.pdf>

**Normal2**

**name** Normal 2 (ID: 0000265)  
**type** continuous  
**variate**  $x$ , scalar  
**support**  $x \in R$

1815

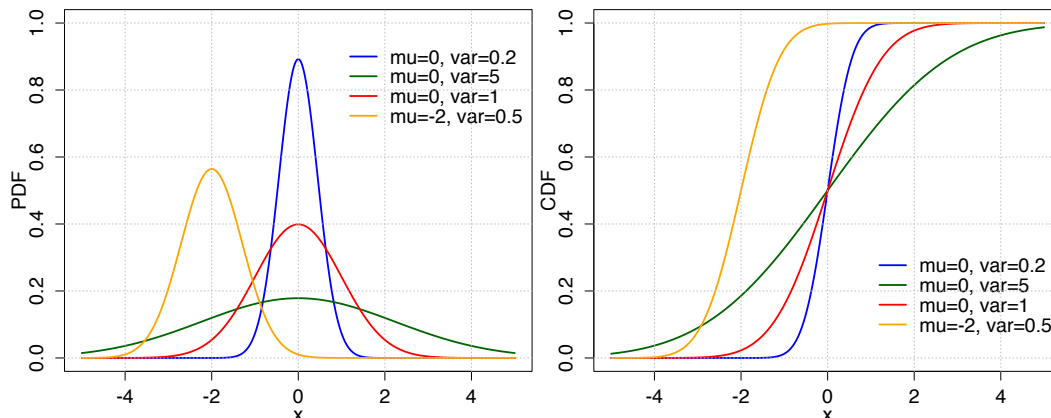

Figure 1.55: Normal2 distribution plotted using the provided R code.

**Parameter: mean**

**name** mean  
**type** scalar  
**symbol**  $\mu$   
**definition**  $\mu \in R$

**Parameter: var**

**name** variance  
**type** scalar  
**symbol**  $v$   
**definition**  $v > 0$

1820 **Functions****PDF**

$$\frac{1}{\sqrt{v}\sqrt{2\pi}} e^{-\frac{(x-\mu)^2}{2v}}$$

**PDF in R**

```
1/(sqrt(var)*sqrt(2*pi))*exp(-(x-mu)^2/(2*var))
```

**CDF**

$$\frac{1}{2} \left[ 1 + \operatorname{erf} \left( \frac{x - \mu}{\sqrt{v}\sqrt{2}} \right) \right]$$

**CDF in R**

```
1/2 * (1 + erf((x-mu)/(sqrt(var)*sqrt(2))))
```

1825 **Characteristics****Mean** $\mu$ **Median** $\mu$ **Mode** $\mu$ **Variance** $v$ **Relationships**

- Relationship pair:  $Normal2(\mu, v) \rightarrow Normal1(\mu, \sigma)$
- Relationship type: Reparameterisation
- Relationship definition:  $\mu = \mu, \sigma = \sqrt{v}$
- 1830 - Relationship pair:  $Normal2(\mu, v) \rightarrow Normal3(\mu, \tau)$
- Relationship type: Reparameterisation
- Relationship definition:  $\mu = \mu, \tau = 1/v$
- Relationship pair:  $Normal1(\mu, \sigma) \rightarrow Normal2(\mu, v)$
- Relationship type: Reparameterisation
- 1835 - Relationship definition:  $\mu = \mu, v = \sigma^2$
- Relationship pair:  $Normal3(\mu, \tau) \rightarrow Normal2(\mu, v)$
- Relationship type: Reparameterisation
- Relationship definition:  $\mu = \mu, v = 1/\tau$

**References**

- 1840 [http://en.wikipedia.org/wiki/Normal\\_distribution](http://en.wikipedia.org/wiki/Normal_distribution)  
<http://www.uncertml.org/distributions/normal>

**Normal3**

|                |                        |
|----------------|------------------------|
| <b>name</b>    | Normal 3 (ID: 0000290) |
| <b>type</b>    | continuous             |
| <b>variate</b> | $x$ , scalar           |
| <b>support</b> | $x \in R$              |

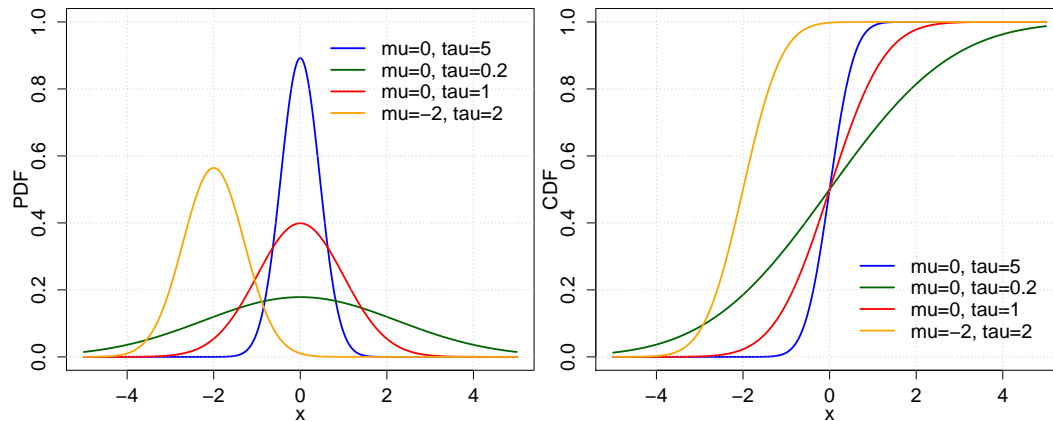

Figure 1.56: Normal3 distribution plotted using the provided R code.

**Parameter: mean**

|                   |             |
|-------------------|-------------|
| <b>name</b>       | mean        |
| <b>type</b>       | scalar      |
| <b>symbol</b>     | $\mu$       |
| <b>definition</b> | $\mu \in R$ |

1845

**Parameter: precision**

|                   |            |
|-------------------|------------|
| <b>name</b>       | precision  |
| <b>type</b>       | scalar     |
| <b>symbol</b>     | $\tau$     |
| <b>definition</b> | $\tau > 0$ |

**Functions****PDF**

$$\sqrt{\frac{\tau}{2\pi}} e^{-\frac{\tau}{2}(x-\mu)^2}$$

**PDF in R**

```
1850 sqrt(tau/(2*pi))*exp(-tau/2*(x-mu)^2)
```

**CDF**

$$\frac{1}{2} \left[ 1 + \operatorname{erf} \left( \frac{x - \mu}{\sqrt{1/\tau} \sqrt{2}} \right) \right]$$

**CDF in R**

```
1/2*(1+erf((x-mu)/(sqrt(1/tau)*sqrt(2))))
```

**Characteristics****Mean**

$$\mu$$

**Median**

$$\mu$$

**Mode**

$$\mu$$

**Variance**

$$1/\tau$$

**Relationships**

- 1855 - Relationship pair:  $Normal3(\mu, \tau) \rightarrow Normal1(\mu, \sigma)$
- Relationship type: Reparameterisation
- Relationship definition:  $\mu = \mu, \sigma = 1/\sqrt{\tau}$
- Relationship pair:  $Normal3(\mu, \tau) \rightarrow Normal2(\mu, v)$
- Relationship type: Reparameterisation
- 1860 - Relationship definition:  $\mu = \mu, v = 1/\tau$
- Relationship pair:  $Normal1(\mu, \sigma) \rightarrow Normal3(\mu, \tau)$
- Relationship type: Reparameterisation
- Relationship definition:  $\mu = \mu, \tau = 1/\sigma^2$
- Relationship pair:  $Normal2(\mu, v) \rightarrow Normal3(\mu, \tau)$
- 1865 - Relationship type: Reparameterisation
- Relationship definition:  $\mu = \mu, \tau = 1/v$

**References**

[Spiegelhalter et al., 2003]

**NormalInverseGamma1**

|      |                                                                                                                                                                                                                           |
|------|---------------------------------------------------------------------------------------------------------------------------------------------------------------------------------------------------------------------------|
| 1870 | <p><b>name</b> Normal-inverse-gamma 1 (ID: 0000316)</p> <p><b>type</b> continuous</p> <p><b>variate</b> <math>x</math>, scalar</p> <p><b>support</b> <math>x \in (-\infty, +\infty), \sigma^2 \in (0, +\infty)</math></p> |
|------|---------------------------------------------------------------------------------------------------------------------------------------------------------------------------------------------------------------------------|

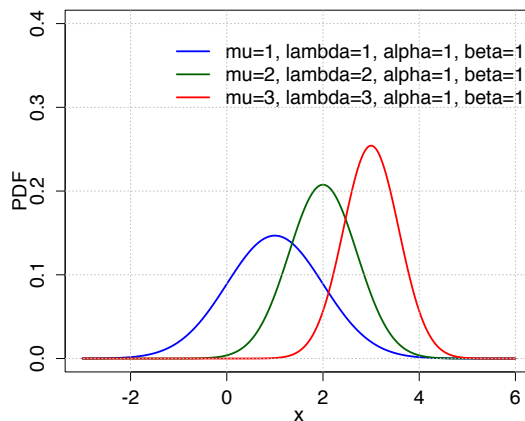

Figure 1.57: NormalInverseGamma1 distribution plotted using the provided R code.

**Parameter: mean**

|                   |             |
|-------------------|-------------|
| <b>name</b>       | location    |
| <b>type</b>       | scalar      |
| <b>symbol</b>     | $\mu$       |
| <b>definition</b> | $\mu \in R$ |

**Parameter: lambda**

|                   |                              |
|-------------------|------------------------------|
| <b>name</b>       | lambda                       |
| <b>type</b>       | scalar                       |
| <b>symbol</b>     | $\lambda$                    |
| <b>definition</b> | $\lambda > 0, \lambda \in R$ |

1875 **Parameter: alpha**

|                   |                            |
|-------------------|----------------------------|
| <b>name</b>       | shape                      |
| <b>type</b>       | scalar                     |
| <b>symbol</b>     | $\alpha$                   |
| <b>definition</b> | $\alpha > 0, \alpha \in R$ |

**Parameter: beta**

|                   |                          |
|-------------------|--------------------------|
| <b>name</b>       | scale                    |
| <b>type</b>       | scalar                   |
| <b>symbol</b>     | $\beta$                  |
| <b>definition</b> | $\beta > 0, \beta \in R$ |

**Functions****PDF**

$$\frac{\sqrt{\lambda}}{\sigma\sqrt{2\pi}} \frac{\beta^\alpha}{\Gamma(\alpha)} \left(\frac{1}{\sigma^2}\right)^{\alpha+1} e^{-\frac{2\beta+\lambda(x-\mu)^2}{2\sigma^2}}$$

1880 **PDF in R**

```
sqrt(lambda)/(sigma*sqrt(2*pi)) * beta^alpha/gamma(alpha) * (1/sigma^2)^(alpha + 1) *
exp(- (2*beta+lambda*(x-mu)^2)/(2*sigma^2))
```

**References**

[http://en.wikipedia.org/wiki/Normal-inverse-gamma\\_distribution](http://en.wikipedia.org/wiki/Normal-inverse-gamma_distribution)

1885 <http://www.uncertml.org/distributions/normal-inverse-gamma>

**Pareto1**

|                |                        |
|----------------|------------------------|
| <b>name</b>    | Pareto 1 (ID: 0000361) |
| <b>type</b>    | continuous             |
| <b>variate</b> | $x$ , scalar           |
| <b>support</b> | $x \in [x_m, +\infty)$ |

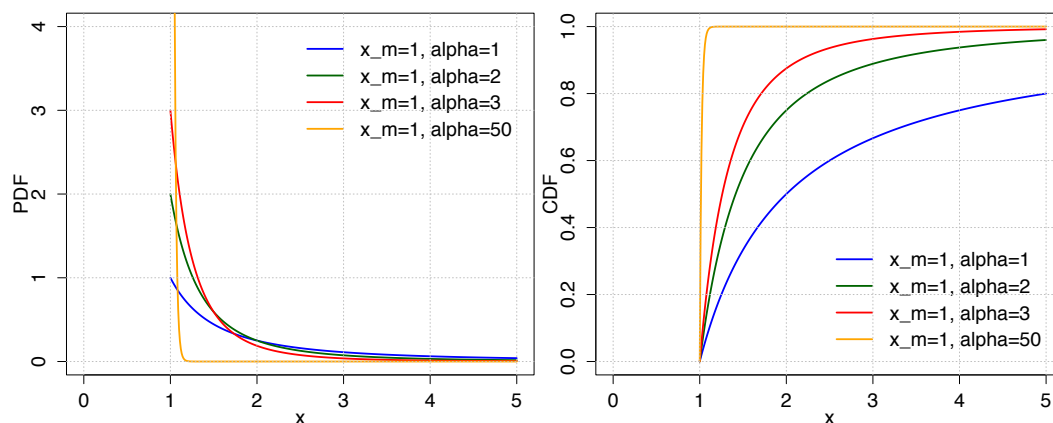

Figure 1.58: Pareto1 distribution plotted using the provided R code.

**Parameter: scale**

|                   |                      |
|-------------------|----------------------|
| <b>name</b>       | scale                |
| <b>type</b>       | scalar               |
| <b>symbol</b>     | $x_m$                |
| <b>definition</b> | $x_m > 0, x_m \in R$ |

1890 **Parameter: shape**

|                   |                            |
|-------------------|----------------------------|
| <b>name</b>       | shape                      |
| <b>type</b>       | scalar                     |
| <b>symbol</b>     | $\alpha$                   |
| <b>definition</b> | $\alpha > 0, \alpha \in R$ |

**Functions****PDF**

$$\frac{\alpha x_m^\alpha}{x^{\alpha+1}} \text{ for } x \geq x_m$$

**PDF in R**

$$(\alpha * x\_m^\alpha) / x^{(\alpha+1)}$$

**CDF**

$$1 - \left(\frac{x_m}{x}\right)^\alpha \text{ for } x \geq x_m$$

1895 **CDF in R**

$$1 - (x\_m/x)^\alpha$$

**Characteristics****Mean**

$$\begin{cases} \infty & \text{for } \alpha \leq 1 \\ \frac{\alpha x_m}{\alpha - 1} & \text{for } \alpha > 1 \end{cases}$$

**Median**

$$x_m \sqrt[2]{2}$$

**Mode**

$$x_m$$

**Variance**

$$\begin{cases} \infty & \text{for } \alpha \in (1, 2] \\ \frac{x_m^2 \alpha}{(\alpha - 1)^2 (\alpha - 2)} & \text{for } \alpha > 2 \end{cases}$$

**Relationships**

- Relationship pair:  $Pareto1(x_m, \alpha) \rightarrow Exponential1(\lambda)$
- 1900 - Relationship type: Transformation
- Relationship definition:  $X \sim Pareto1, Y = \log(X/\lambda) \Rightarrow Y \sim Exponential1$
- Relationship pair:  $StandardUniform1(0, 1) \rightarrow Pareto1(x_m, \alpha)$
- Relationship type: Transformation
- Relationship definition:  $x_m X^{-1/\alpha}$

1905 **References**

[http://en.wikipedia.org/wiki/Pareto\\_distribution](http://en.wikipedia.org/wiki/Pareto_distribution)  
<http://www.uncertml.org/distributions/pareto>

**Poisson1**

|                |                               |
|----------------|-------------------------------|
| <b>name</b>    | Poisson 1 (ID: 0000410)       |
| <b>type</b>    | discrete                      |
| <b>variate</b> | $k$ , scalar                  |
| <b>support</b> | $k \in \{0, 1, 2, 3, \dots\}$ |

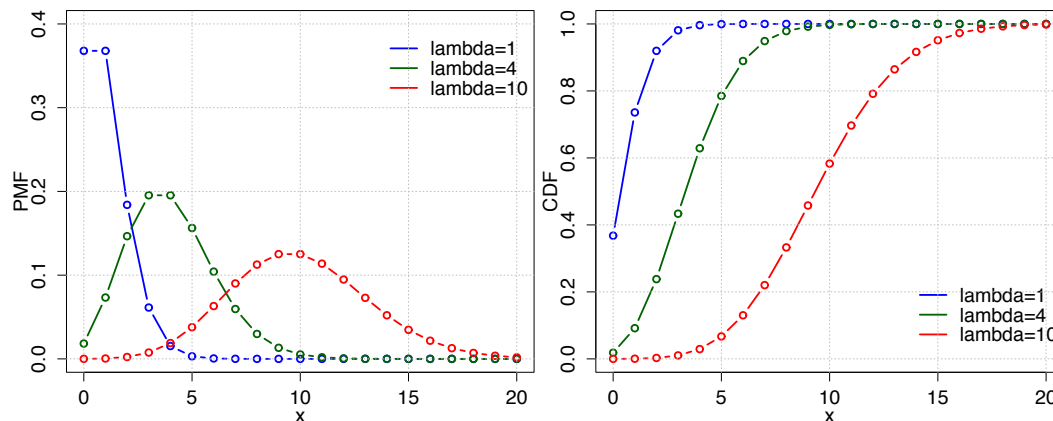

Figure 1.59: Poisson1 distribution plotted using the provided R code.

1910 **Parameter: rate**

**name** Poisson intensity  
**type** scalar  
**symbol**  $\lambda$   
**definition**  $\lambda \in \mathbb{Z}^+$

**Functions**

**PMF**

$$\frac{\lambda^k}{k!} e^{-\lambda}$$

**PMF in R**

`lambda^k/factorial(k) * exp(-lambda)`

**CDF**

$$\frac{\gamma(\lfloor k + 1 \rfloor, \lambda)}{\lfloor k \rfloor!}$$

1915 **CDF in R**

`Igamma(floor(k+1), lambda, lower=F) / factorial(floor(k))`

**Characteristics**

**Mean**

$$\lambda$$

**Median**

$$\approx \lfloor \lambda + 1/3 - 0.02/\lambda \rfloor$$

**Mode**

$$\lceil \lambda \rceil - 1, \lfloor \lambda \rfloor$$

**Variance**

$$\lambda$$

**Relationships**

- Relationship pair:  $Poisson1(\lambda) \rightarrow Normal1(\mu, \sigma)$
- 1920 - Relationship type: Transformation & Limiting
- Relationship definition:  $\sigma^2 = \lambda, \mu = \lambda, \lambda \rightarrow \infty$
- Relationship pair:  $GeneralizedPoisson1(\theta, \delta) \rightarrow Poisson1(\lambda)$
- Relationship type: Special case
- Relationship definition:  $\delta = 0, \theta = \mu$



- 1925 - Relationship pair:  $ConwayMaxwellPoisson1(\lambda, \nu) \rightarrow Poisson1(\lambda)$   
 - Relationship type: Transformation  
 - Relationship definition: For  $\nu = 1$  the sum has a Poisson distribution with parameter  $n\lambda$   
 - Relationship pair:  $Binomial1(n, p) \rightarrow Poisson1(\lambda)$   
 - Relationship type: Transformation & Limiting
- 1930 - Relationship definition:  $\lambda = np, n \rightarrow \infty$   
 - Relationship pair:  $GeneralizedPoisson2(\mu, \delta) \rightarrow Poisson1(\lambda)$   
 - Relationship type: Special case  
 - Relationship definition:  $\delta = 0, \lambda = \mu$   
 - Relationship pair:  $GeneralizedPoisson3(\mu, \alpha) \rightarrow Poisson1(\lambda)$
- 1935 - Relationship type: Special case  
 - Relationship definition:  $\alpha = 0, \lambda = \mu$   
 - Relationship pair:  $DoublePoisson1(\mu, \phi) \rightarrow Poisson1(\lambda)$   
 - Relationship type: Special case  
 - Relationship definition:  $\phi = 1$
- 1940 - Relationship pair:  $ZeroInflatedPoisson1(\lambda, \pi) \rightarrow Poisson1(\lambda)$   
 - Relationship type: Special case  
 - Relationship definition:  $\pi = 0$   
 - Relationship pair:  $ZeroInflatedNegativeBinomial1(\lambda, \tau, p0) \rightarrow Poisson1(\lambda)$   
 - Relationship type: Limiting
- 1945 - Relationship definition:  $p0 = 0, \tau \rightarrow 0$   
 - Relationship pair:  $NegativeBinomial1(r, p) \rightarrow Poisson1(\lambda)$   
 - Relationship type: Reparameterisation & Limiting  
 - Relationship definition:  $\mu = np, n \rightarrow \infty$   
 - Relationship pair:  $ZeroInflatedGeneralizedPoisson1(\mu, \alpha, p0) \rightarrow Poisson1(\lambda)$
- 1950 - Relationship type: Special case & Reparameterisation  
 - Relationship definition:  $p0 = 0, \alpha = 0, \lambda = \mu$   
 - Relationship pair:  $Hypergeometric1(N, K, n) \rightarrow Poisson1(\lambda)$   
 - Relationship type: Limiting  
 - Relationship definition:  $X \sim Hypergeometric1(N, K, n) \Rightarrow Y \sim Poisson1(\lambda)$  as  $K, N$  and  $n$  tend to infinity for
- 1955  $K/N$  small and  $nK/N \rightarrow \lambda$

## References

- [Leemis and Mcqueston, 2008], [Yang et al., 2007], [Plan, 2014], [Hilbe, 2011], [Famoye and Singh, 2006]  
 [Cameron and Trivedi, 2013], [Trocóniz et al., 2009], [Forbes et al., 2011], [Shmueli et al., 2005]  
[http://en.wikipedia.org/wiki/Poisson\\_distribution](http://en.wikipedia.org/wiki/Poisson_distribution)  
 1960 <http://www.uncertml.org/distributions/poisson>  
<http://www.math.wm.edu/~leemis/chart/UDR/PDFs/BinomialPoisson.pdf>  
<http://www.math.wm.edu/~leemis/chart/UDR/PDFs/PoissonNormal.pdf>  
<http://www.math.wm.edu/~leemis/chart/UDR/PDFs/PascalPoisson.pdf>

## Rayleigh1

|              |                          |
|--------------|--------------------------|
| name         | Rayleigh 1 (ID: 0000462) |
| type         | continuous               |
| 1965 variate | $x$ , scalar             |
| support      | $x \in [0, +\infty)$     |

### Parameter: scale

|            |              |
|------------|--------------|
| name       | scale        |
| type       | scalar       |
| symbol     | $\sigma$     |
| definition | $\sigma > 0$ |

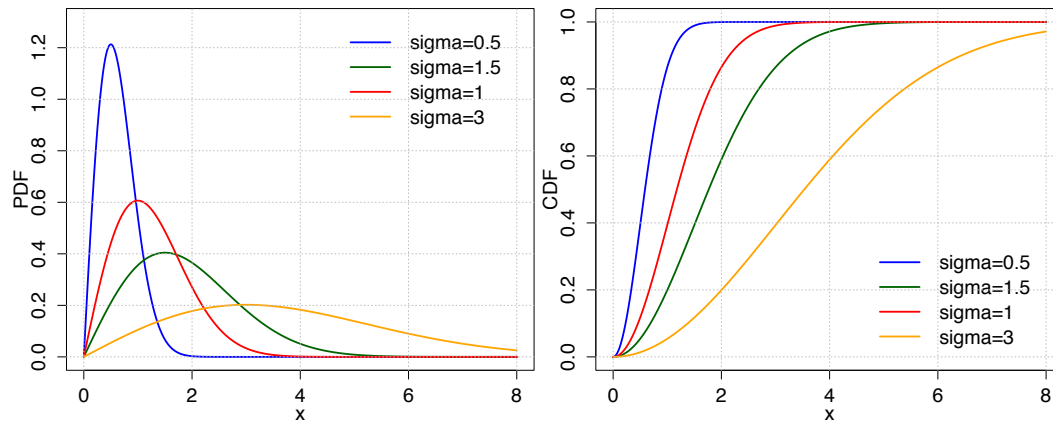

Figure 1.60: Rayleigh1 distribution plotted using the provided R code.

## Functions

### PDF

$$\frac{x}{\sigma^2} e^{-x^2/(2\sigma^2)}$$

### PDF in R

```
1970 x/sigma^2 * exp(-x^2/(2*sigma^2))
```

### CDF

$$1 - e^{-x^2/(2\sigma^2)}$$

### CDF in R

```
1 - exp(-x^2/(2*sigma^2))
```

## Characteristics

### Mean

$$\sigma \sqrt{\frac{\pi}{2}}$$

### Median

$$\sigma \sqrt{\log(4)}$$

### Mode

$$\sigma$$

### Variance

$$\frac{4 - \pi}{2} \sigma^2$$

## Relationships

- 1975 - Relationship pair:  $Weibull1(\lambda, k) \rightarrow Rayleigh1(\sigma)$
- Relationship type:
- Relationship definition:  $k = 2, \lambda = \sqrt{2}\sigma$

## References

[https://en.wikipedia.org/wiki/Rayleigh\\_distribution](https://en.wikipedia.org/wiki/Rayleigh_distribution)

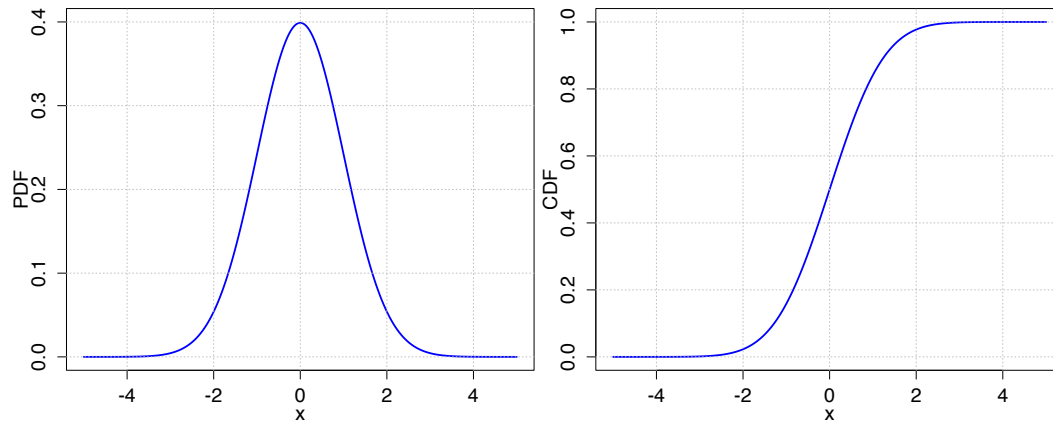

Figure 1.61: StandardNormal1 distribution plotted using the provided R code.

## StandardNormal1

**name** Standard Normal 1 (ID: 0000562)  
**type** continuous  
**variate**  $x$ , scalar  
**support**  $x \in R$

### Parameter: mean

**name** mean  
**type** scalar  
**symbol**  $\mu$   
**definition**  $\mu = 0$

### Parameter: stdev

**name** standard deviation  
**type** scalar  
**symbol**  $\sigma$   
**definition**  $\sigma = 1$

### Functions

#### PDF

$$\frac{e^{-\frac{1}{2}x^2}}{\sqrt{2\pi}}$$

#### PDF in R

```
1/(sqrt(2*pi))*exp(-x^2/2)
```

#### CDF

$$\frac{1}{2} \left[ 1 + \operatorname{erf} \left( \frac{x}{\sqrt{2}} \right) \right]$$

#### CDF in R

```
1990 1/2 * (1 + erf(x/(sqrt(2))))
```

### Characteristics

#### Mean

0

#### Median

0

**Mode**

0

**Variance**

1

**Relationships**

- Relationship pair: *StandardNormal1*(0, 1) → *ChiSquared1*(k)
- Relationship type: Transformation
- 1995 - Relationship definition:  $\Sigma X^2$
- Relationship pair: *StandardNormal1*(0, 1) → *Normal1*( $\mu, \sigma$ )
- Relationship type: Transformation
- Relationship definition:  $X \sim \text{StandardNormal1}$  and  $Y = \mu + \sigma X \Rightarrow Y \sim \text{Normal1}$
- Relationship pair: *StudentT1*( $\nu$ ) → *StandardNormal1*(0, 1)
- 2000 - Relationship type: Limiting
- Relationship definition:  $X \sim \text{StudentT1}(\nu) \Rightarrow \text{StandardNormal1}(0, 1)$  as  $\nu$  tends to infinity.  
The approximation is reasonable for  $\nu \geq 30$
- Relationship pair: *Normal1*( $\mu, \sigma$ ) → *StandardNormal1*(0, 1)
- Relationship type: Special case
- 2005 - Relationship definition:  $\mu = 0, \sigma = 1$
- Relationship pair: *InverseGaussian1*( $\lambda, \mu$ ) → *StandardNormal1*(0, 1)
- Relationship type: Limiting
- Relationship definition:  $\lambda \rightarrow \infty$
- Relationship pair: *Normal1*( $\mu, \sigma$ ) → *StandardNormal1*(0, 1)
- 2010 - Relationship type: Transformation
- Relationship definition:  $X \sim \text{Normal1}(\mu, \sigma); Y = (X - \mu)/\sigma; Y \sim \text{StandardNormal1}$

**References**

- [Forbes et al., 2011], [Leemis and Mcqueston, 2008]
- 2015 [https://en.wikipedia.org/wiki/Normal\\_distribution#Standard\\_normal\\_distribution](https://en.wikipedia.org/wiki/Normal_distribution#Standard_normal_distribution)
  - <http://www.math.wm.edu/~leemis/chart/UDR/PDFs/NormalStandardnormalT.pdf>
  - <http://www.math.wm.edu/~leemis/chart/UDR/PDFs/StandardnormalChisquare.pdf>
  - <http://www.math.wm.edu/~leemis/chart/UDR/PDFs/StandardnormalNormal.pdf>
  - <http://www.math.wm.edu/~leemis/chart/UDR/PDFs/NormalStandardnormalT.pdf>
  - <http://www.math.wm.edu/~leemis/chart/UDR/PDFs/InversegaussianStandardnormal.pdf>

2020 **StandardUniform1**

**name** Standard Uniform 1 (ID: 0000587)  
**type** continuous  
**variate**  $x$ , scalar  
**support**  $x \in [0, 1]$

**Parameter: minimum**

**name** minimum  
**type** scalar  
**symbol**  $a$   
**definition**  $a = 0$

**Parameter: maximum**

2025 **name** maximum  
**type** scalar  
**symbol**  $b$   
**definition**  $b = 1$

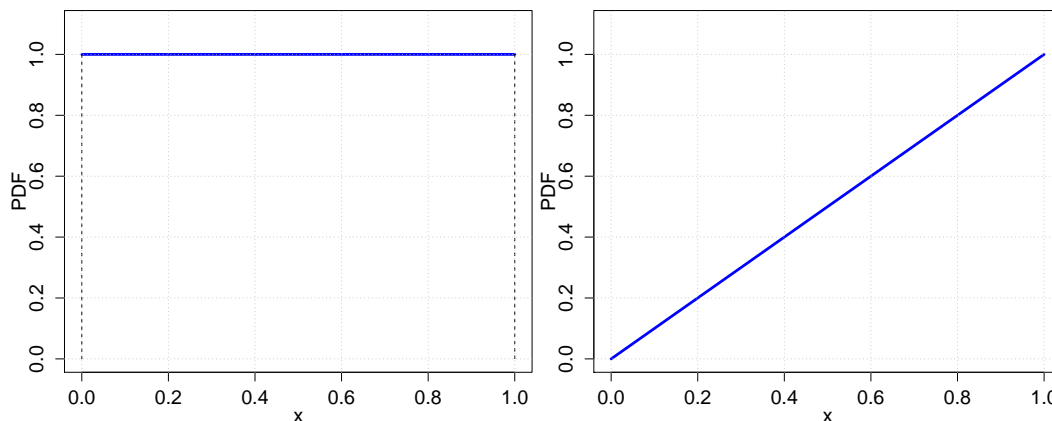

Figure 1.62: StandardUniform1 distribution plotted using the provided R code.

**Functions**

**PDF**

1

**PDF in R**

1

**CDF**

$x$

**CDF in R**

2030 **x**

**Characteristics**

**Mean**

0.5

**Median**

0.5

**Mode**

any value in  $[0, 1]$

**Relationships**

- Relationship pair:  $StandardUniform1(0, 1) \rightarrow Exponential1(\lambda)$

- Relationship type: Transformation

2035 - Relationship definition:  $-\frac{1}{\lambda} \log(X)$

- Relationship pair:  $StandardUniform1(0, 1) \rightarrow Beta1(alpha, beta)$

- Relationship type: Transformation

- Relationship definition:  $aX_1, X_2, \dots, X_n(iid) \sim StandardNormal1 \Rightarrow$  with  $\alpha = r$  and  $\beta = n - r + 1, X_{(r)} \sim Beta(\alpha, \beta)$

2040 - Relationship pair:  $StandardUniform1(0, 1) \rightarrow Uniform1(a, b)$

- Relationship type: Transformation

- Relationship definition:  $X \sim StandardNormal1$  and  $Y = a + (b - a)X \Rightarrow Y \sim Uniform1$

- Relationship pair:  $StandardUniform1 \rightarrow LogLogistic2(\lambda, \kappa)$

- Relationship type: Transformation

2045 - Relationship definition: If  $X \sim StandardUniform1$  and  $Y = \frac{1}{\lambda} \left( \frac{1-X}{X} \right)^{1/\kappa} \Rightarrow Y \sim LogLogistic2(\lambda, \kappa)$

- Relationship pair:  $Uniform1(a, b) \rightarrow StandardUniform1(0, 1)$

- Relationship type: Special case

- Relationship definition:  $a = 0, b = 1$
- Relationship pair:  $StandardUniform1(0, 1) \rightarrow Pareto1(x_m, \alpha)$
- 2050 - Relationship type: Transformation
- Relationship definition:  $x_m X^{-1/\alpha}$

**References**

- [Leemis and Mcqueston, 2008]
- <http://www.math.wm.edu/~leemis/chart/UDR/PDFs/Standarduniform.pdf>
  - 2055 <http://www.math.wm.edu/~leemis/chart/UDR/PDFs/StandarduniformExponentialB.pdf>
  - <http://www.math.wm.edu/~leemis/chart/UDR/PDFs/StandarduniformPareto.pdf>
  - <http://www.math.wm.edu/~leemis/chart/UDR/PDFs/StandarduniformBeta.pdf>
  - <http://www.math.wm.edu/~leemis/chart/UDR/PDFs/StandarduniformUniform.pdf>
  - <http://www.math.wm.edu/~leemis/chart/UDR/PDFs/UniformStandarduniform.pdf>

2060 **StudentT1**

**name** Student’s t-distribution 1 (ID: 0000613)  
**type** continuous  
**variate**  $x$ , scalar  
**support**  $x \in (-\infty, +\infty)$

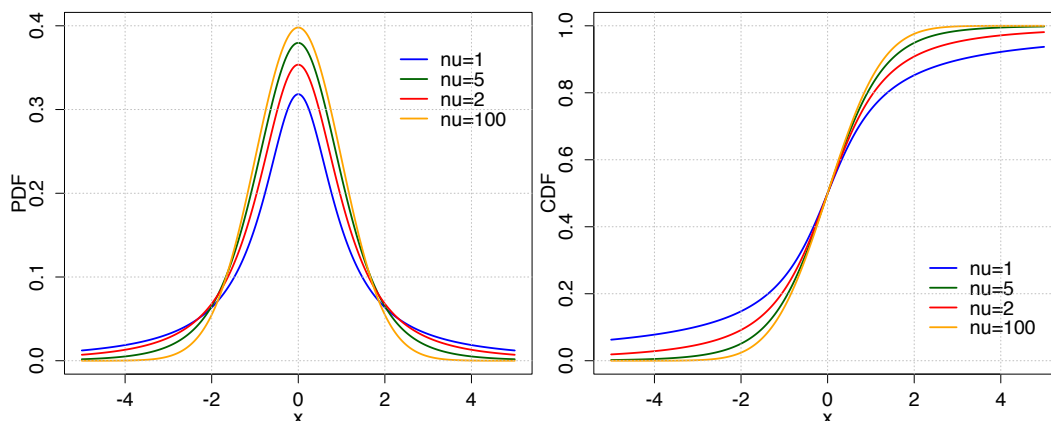

Figure 1.63: StudentT1 distribution plotted using the provided R code.

**Parameter: degreesOfFreedom**

**name** degrees of freedom  
**type** scalar  
**symbol**  $\nu$   
**definition**  $\nu > 0, \nu \in R$

**Functions**

**PDF**

$$\frac{\Gamma(\frac{\nu+1}{2})}{\sqrt{\nu\pi} \Gamma(\frac{\nu}{2})} \left(1 + \frac{x^2}{\nu}\right)^{-\frac{\nu+1}{2}}$$

2065 **PDF in R**

`gamma((nu+1)/2)/(sqrt(nu*pi)*gamma(nu/2))*(1+x^2/nu)^(-(nu+1)/2)`

**CDF**

$$\frac{1}{2} + x\Gamma\left(\frac{\nu+1}{2}\right) \times \frac{{}_2F_1\left(\frac{1}{2}, \frac{\nu+1}{2}; \frac{3}{2}; -\frac{x^2}{\nu}\right)}{\sqrt{\pi\nu} \Gamma\left(\frac{\nu}{2}\right)}$$

**CDF in R**

$$1/2*x*gamma((nu+1)/2)*hypergeo(1/2,(nu+1)/2,3/2,-x^2/nu)/(sqrt(pi*nu)*gamma(nu/2))$$

### Characteristics

#### Mean

$$\begin{cases} 0 & \text{for } \nu > 1 \\ \text{undefined} & \text{else} \end{cases}$$

#### Median

0

#### Mode

0

#### Variance

$$\begin{cases} \frac{\nu}{\nu-2} & \text{for } \nu > 2 \\ \infty & \text{for } 1 < \nu \leq 2 \\ \text{undefined} & \text{else} \end{cases}$$

### 2070 Relationships

- Relationship pair:  $StudentT1(\nu) \rightarrow StandardNormal1(0,1)$
- Relationship type: Limiting
- Relationship definition:  $X \sim StudentT1(\nu) \Rightarrow StandardNormal1(0,1)$  as  $\nu$  tends to infinity.  
The approximation is reasonable for  $\nu \geq 30$

### 2075 Relationship pair: $StudentT1(\nu) \rightarrow F1(n_1, n_2)$

- Relationship type: Transformation
- Relationship definition: If  $X \sim StudentT1(\nu) \Rightarrow Y = X^2 \sim F(1, \nu)$
- Relationship pair:  $StudentT2(\mu, \tau, k) \rightarrow StudentT1(\nu)$

- Relationship type: Reparameterisation

### 2080 Relationship definition: $\mu = 0, \tau = 1$

### References

- [Forbes et al., 2011], [Leemis and Mcqueston, 2008]  
[http://en.wikipedia.org/wiki/Student's\\_t-distribution](http://en.wikipedia.org/wiki/Student's_t-distribution)  
<http://www.uncertml.org/distributions/student-t>  
<http://www.math.wm.edu/~leemis/chart/UDR/PDFs/TF.pdf>

2085

## StudentT2

**name** Student's t-distribution 2 (ID: 0000635)  
**type** continuous  
**variate**  $x$ , scalar  
**support**  $x \in (-\infty, +\infty)$

### Parameter: mean

**name** mean  
**type** scalar  
**symbol**  $\mu$   
**definition**  $\mu \in R$

### 2090 Parameter: scale

**name** scale  
**type** scalar  
**symbol**  $\tau$   
**definition**  $\tau > 0$

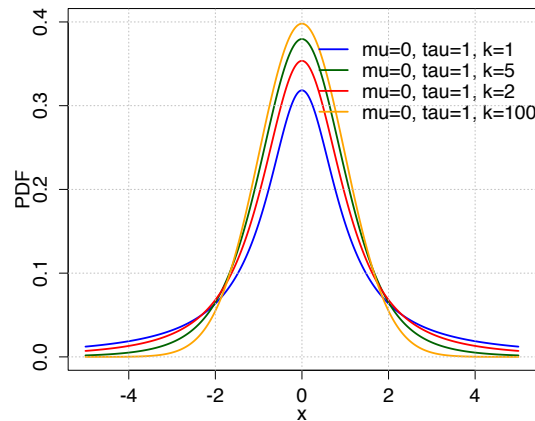

Figure 1.64: StudentT2 distribution plotted using the provided R code.

**Parameter: degreesOfFreedom**

|                   |                    |
|-------------------|--------------------|
| <b>name</b>       | degrees of freedom |
| <b>type</b>       | scalar             |
| <b>symbol</b>     | $k$                |
| <b>definition</b> | $k \geq 2$         |

**Functions****PDF**

$$\frac{\Gamma\left(\frac{k+1}{2}\right)}{\Gamma\left(\frac{k}{2}\right)} \sqrt{\frac{\tau}{k\pi}} \left[1 + \frac{\tau}{k}(x - \mu)^2\right]^{-\frac{k+1}{2}}$$

**PDF in R**

```
gamma((k+1)/2)/gamma(k/2)*sqrt(tau/(k*pi))*(1+tau/k*(x-mu)^2)^(-(k+1)/2)
```

**Characteristics****Mean**

$$\mu$$

**Mode**

$$\mu \text{ for } k > 1$$

**Variance**

$$\frac{1}{\tau} \frac{k}{k-2} \text{ for } k > 2$$

**Relationships**

- Relationship pair:  $StudentT2(\mu, \tau, k) \rightarrow StudentT1(\nu)$
- Relationship type: Reparameterisation
- Relationship definition:  $\mu = 0, \tau = 1$

**References**

[https://en.wikipedia.org/wiki/Student%27s\\_t-distribution#Non-standardized\\_Student.27s\\_t-distribution](https://en.wikipedia.org/wiki/Student%27s_t-distribution#Non-standardized_Student.27s_t-distribution)

**Triangular1**

|                |                            |
|----------------|----------------------------|
| <b>name</b>    | Triangular 1 (ID: 0000661) |
| <b>type</b>    | continuous                 |
| <b>variate</b> | $x$ , scalar               |
| <b>support</b> | $a \leq x \leq b$          |



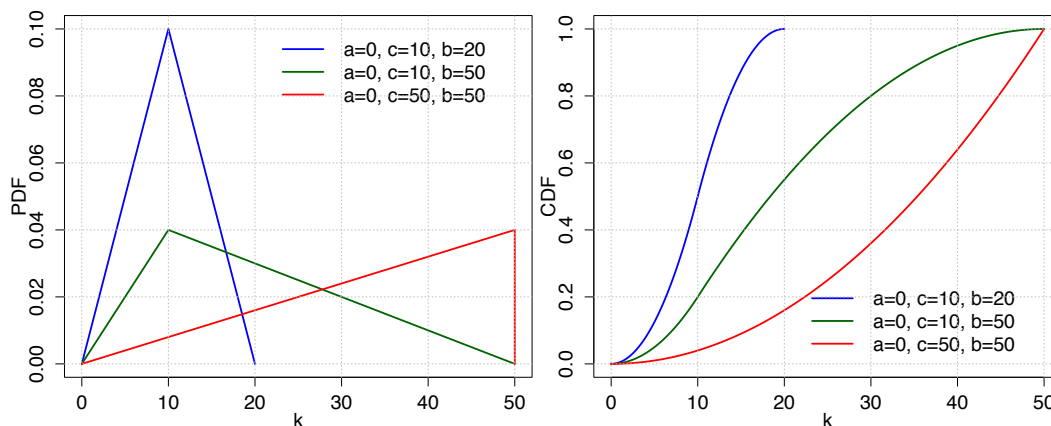

Figure 1.65: Triangular1 distribution plotted using the provided R code.

**Parameter: lowerLimit**

**name** lower limit  
**type** scalar  
**symbol**  $a$   
**definition**  $a \in R$

**Parameter: upperLimit**

**name** upper limit  
**type** scalar  
**symbol**  $b$   
**definition**  $b \in R, a < b$

2110 **Parameter: shape**

**name** shape (mode)  
**type** scalar  
**symbol**  $c$   
**definition**  $c \in R$

**Functions**

**PDF**

$$\begin{cases} 2(x - a) / [(b - a)(c - a)] & \text{for } a \leq x \leq c \\ 2(b - x) / [(b - a)(b - c)] & \text{for } c \leq x \leq b \end{cases}$$

**PDF in R**

```
2115 2*(x-a) / ((b-a)*(c-a)) for a <= x <= c \\
2*(b-x) / ((b-a)*(b-c)) for c <= x <= b
```

**CDF**

$$\begin{cases} (x - a)^2 / [(b - a)(c - a)] & \text{for } a \leq x \leq c \\ 1 - (b - x)^2 / [(b - a)(b - c)] & \text{for } c \leq x \leq b \end{cases}$$

**CDF in R**

```
(x-a)^2 / ((b-a)*(c-a)) for a <= x <= c \\
1 - (b-x)^2 / ((b-a)*(b-c)) for c <= x <= b
```

**Characteristics****Mean**

$$(a + b + c)/3$$

**Mode**

$$c$$

**Variance**

$$(a^2 + b^2 + c^2 - ab - ac - bc)/18$$

2120 **References**

[Forbes et al., 2011]

**TruncatedNormal1**

**name** Truncated Normal 1 (ID: 0000681)  
**type** continuous  
**variate**  $x$ , scalar  
**support**  $x \in [a, b]$

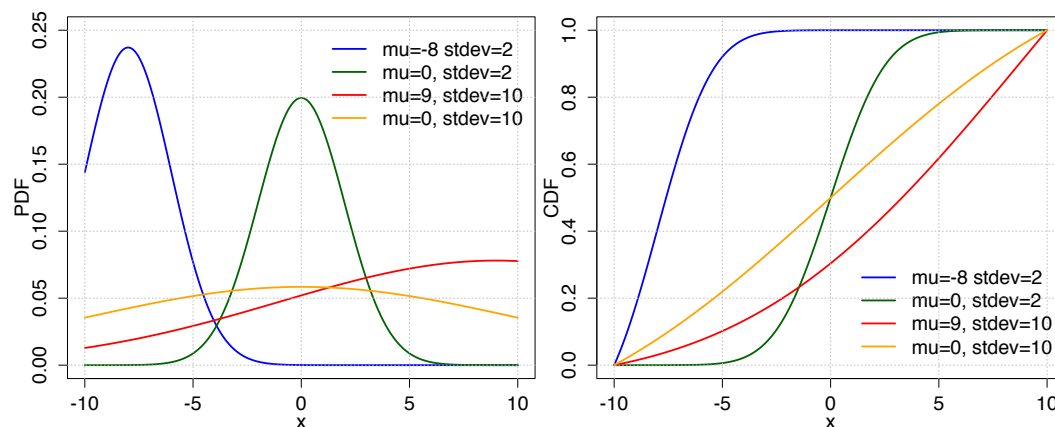

Figure 1.66: TruncatedNormal1 distribution plotted using the provided R code.

**Parameter: mean**

**name** mean  
**type** scalar  
**symbol**  $\mu$   
**definition**  $\mu \in R$

2125

**Parameter: stdev**

**name** standard deviation  
**type** scalar  
**symbol**  $\sigma$   
**definition**  $\sigma > 0$

**Parameter: lowerBound**

**name** lower bound  
**type** scalar  
**symbol**  $a$   
**definition**  $a \in R$

2130 **Parameter: upperBound**

|                   |                  |
|-------------------|------------------|
| <b>name</b>       | upper bound      |
| <b>type</b>       | scalar           |
| <b>symbol</b>     | $b$              |
| <b>definition</b> | $b \in R, b > a$ |

**Functions****PDF**

$$\frac{\frac{1}{\sigma} \phi\left(\frac{x-\mu}{\sigma}\right)}{\Phi\left(\frac{b-\mu}{\sigma}\right) - \Phi\left(\frac{a-\mu}{\sigma}\right)}$$

**PDF in R**

( 1/sigma \* phi((x-mu)/sigma) ) / ( Phi((b-mu)/sigma)-Phi((a-mu)/sigma) )

2135

```
phi = function(x) { 1/(sqrt(2*pi))*exp(-x^2/2) }
Phi = function(x) { 1/2 * (1 + erf(x/(sqrt(2)))) }
erf = function(x) { 2 * pnorm(x * sqrt(2)) - 1 }
```

**CDF**

$$\frac{\Phi\left(\frac{x-\mu}{\sigma}\right) - \Phi\left(\frac{a-\mu}{\sigma}\right)}{\Phi\left(\frac{b-\mu}{\sigma}\right) - \Phi\left(\frac{a-\mu}{\sigma}\right)}$$

**CDF in R**

2140 ( Phi((x-mu)/sigma)-Phi((a-mu)/sigma) ) / ( Phi((b-mu)/sigma)-Phi((a-mu)/sigma) )

```
Phi = function(x) { 1/2 * (1 + erf(x/(sqrt(2)))) }
erf = function(x) { 2 * pnorm(x * sqrt(2)) - 1 }
```

**Characteristics****Mean**

$$\mu + \frac{\phi\left(\frac{a-\mu}{\sigma}\right) - \phi\left(\frac{b-\mu}{\sigma}\right)}{\Phi\left(\frac{b-\mu}{\sigma}\right) - \Phi\left(\frac{a-\mu}{\sigma}\right)} \sigma$$

**Variance**

$$\sigma^2 \left[ 1 + \frac{\frac{a-\mu}{\sigma} \phi\left(\frac{a-\mu}{\sigma}\right) - \frac{b-\mu}{\sigma} \phi\left(\frac{b-\mu}{\sigma}\right)}{\Phi\left(\frac{b-\mu}{\sigma}\right) - \Phi\left(\frac{a-\mu}{\sigma}\right)} - \left( \frac{\phi\left(\frac{a-\mu}{\sigma}\right) - \phi\left(\frac{b-\mu}{\sigma}\right)}{\Phi\left(\frac{b-\mu}{\sigma}\right) - \Phi\left(\frac{a-\mu}{\sigma}\right)} \right)^2 \right]$$

2145 **Relationships**

- Relationship pair:  $TruncatedNormal1(\mu, \sigma, a, b) \rightarrow Normal1(\mu, \sigma)$
- Relationship type: Special case
- Relationship definition:  $a = -\infty, b = \infty$
- Relationship pair:  $TruncatedNormal1(\mu, \sigma, a, b) \rightarrow HalfNormal1(\theta)$
- 2150 - Relationship type: Special case
- Relationship definition:  $\mu = 0, a = 0, b = \infty$

**References**

[Forbes et al., 2011], [Forbes et al., 2011]

[https://en.wikipedia.org/wiki/Truncated\\_normal\\_distribution](https://en.wikipedia.org/wiki/Truncated_normal_distribution)

2155 <http://reference.wolfram.com/language/ref/HalfNormalDistribution.html>

**Uniform1**

|                |                         |
|----------------|-------------------------|
| <b>name</b>    | Uniform 1 (ID: 0000703) |
| <b>type</b>    | continuous              |
| <b>variate</b> | $x$ , scalar            |
| <b>support</b> | $x \in [a, b]$          |

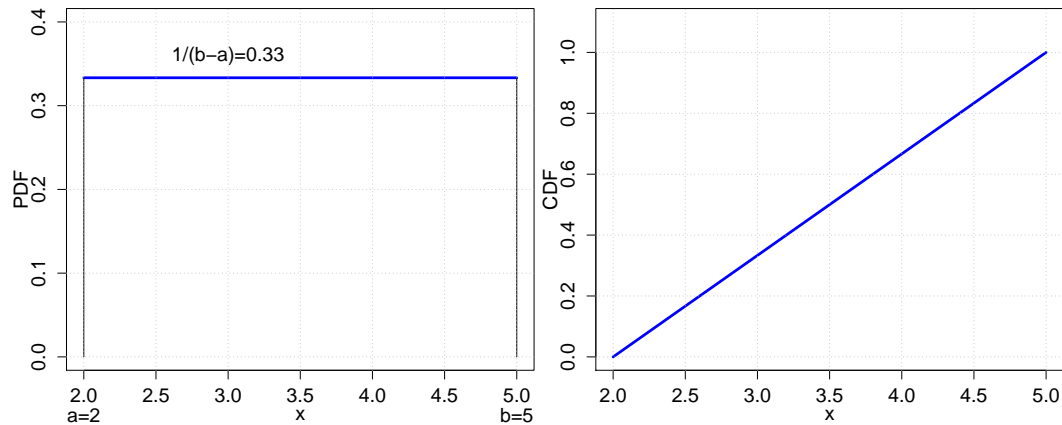

Figure 1.67: Uniform1 distribution plotted using the provided R code.

**Parameter: minimum**

|                   |           |
|-------------------|-----------|
| <b>name</b>       | minimum   |
| <b>type</b>       | scalar    |
| <b>symbol</b>     | $a$       |
| <b>definition</b> | $a \in R$ |

2160 **Parameter: maximum**

|                   |                  |
|-------------------|------------------|
| <b>name</b>       | maximum          |
| <b>type</b>       | scalar           |
| <b>symbol</b>     | $b$              |
| <b>definition</b> | $b \in R, a < b$ |

**Functions****PDF**

$$\begin{cases} \frac{1}{b-a} & \text{for } x \in [a, b] \\ 0 & \text{otherwise} \end{cases}$$

**PDF in R**

$$1/(b-a)$$

**CDF**

$$\begin{cases} 0 & \text{for } x < a \\ \frac{x-a}{b-a} & \text{for } x \in [a, b) \\ 1 & \text{for } x \geq b \end{cases}$$

2165 **CDF in R**

$$(x-a)/(b-a)$$

**Characteristics****Mean**

$$\frac{1}{2}(a+b)$$

**Median**

$$\frac{1}{2}(a+b)$$

**Mode**

any value in  $[a, b]$

**Variance**

$$\frac{1}{12}(b-a)^2$$

## Relationships

- Relationship pair:  $Uniform1(a, b) \rightarrow StandardUniform1(0, 1)$
- 2170 - Relationship type: Special case
- Relationship definition:  $a = 0, b = 1$
- Relationship pair:  $StandardUniform1(0, 1) \rightarrow Uniform1(a, b)$
- Relationship type: Transformation
- Relationship definition:  $X \sim StandardNormal1$  and  $Y = a + (b - a)X \Rightarrow Y \sim Uniform1$

## References

- [Leemis and Mcqueston, 2008]  
[http://en.wikipedia.org/wiki/Uniform\\_distribution\\_\(continuous\)](http://en.wikipedia.org/wiki/Uniform_distribution_(continuous))  
<http://www.uncertml.org/distributions/uniform>  
<http://www.math.wm.edu/~leemis/chart/UDR/PDFs/StandarduniformUniform.pdf>  
 2180 <http://www.math.wm.edu/~leemis/chart/UDR/PDFs/UniformStandarduniform.pdf>

## UniformDiscrete1

**name** Uniform Discrete 1 (ID: 0000727)  
**type** discrete  
**variate**  $k$ , scalar  
**support**  $k \in \{a, a + 1, \dots, b - 1, b\}$

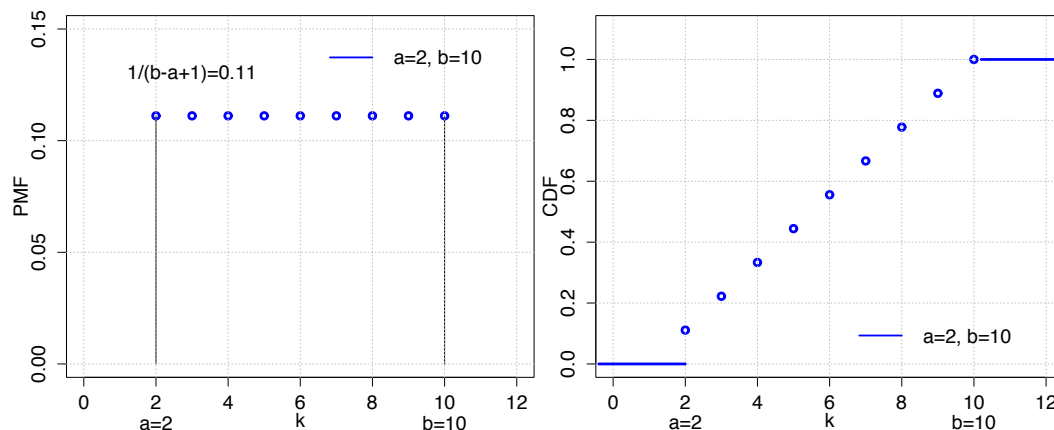

Figure 1.68: UniformDiscrete1 distribution plotted using the provided R code.

### Parameter: minimum

**name** minimum  
**type** scalar  
**symbol**  $a$   
**definition**  $a \in \{\dots, -2, -1, 0, 1, 2, 3, \dots\}$

### 2185 Parameter: maximum

**name** maximum  
**type** scalar  
**symbol**  $b$   
**definition**  $b \in \{\dots, -2, -1, 0, 1, 2, 3, \dots\}, b \geq a$

### Functions

#### PMF

$$1/(b - a + 1)$$

#### PMF in R

$1/(b-a+1)$

**CDF**

$(k - a + 1)/(b - a + 1)$

2190 **CDF in R**

$(k-a+1)/(b-a+1)$

**Characteristics**

**Mean**

$(a + b)/2$

**Median**

$(a + b)/2$

**Variance**

$\frac{(b - a + 1)^2 - 1}{12}$

**Relationships**

- Relationship pair: *UniformDiscrete1(a,b) → UniformDiscrete2(n)*
- 2195 - Relationship type: Special case
- Relationship definition:  $a = 0, b = n$

**References**

[Leemis and Mcqueston, 2008], [Marichev and Trott, 2013]  
<http://www.math.wm.edu/~leemis/chart/UDR/PDFs/DiscreteuniformRectangular.pdf>

2200 **UniformDiscrete2**

**name** Uniform Discrete 2 (ID: 0000750)  
**type** discrete  
**variate**  $k$ , scalar  
**support**  $k \in \{0, 1, 2, \dots, n\}$

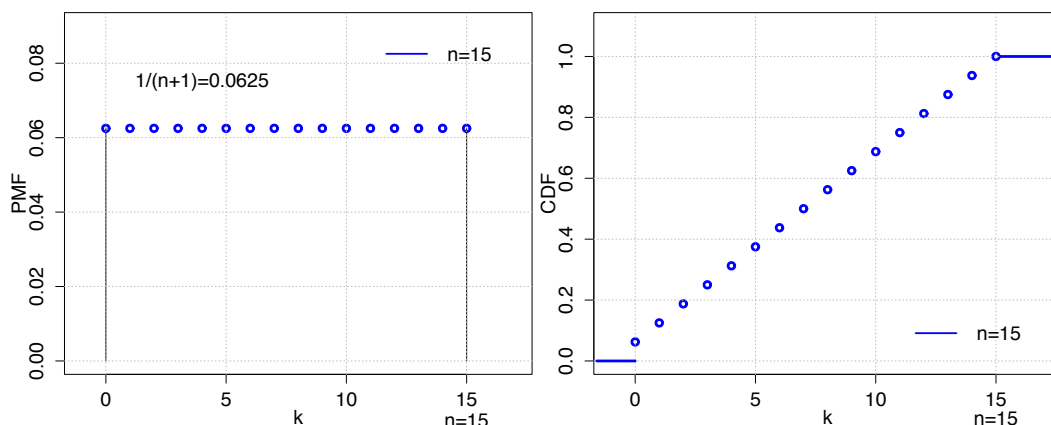

Figure 1.69: UniformDiscrete2 distribution plotted using the provided R code.

**Parameter: numberOfValues**

**name** number of values  
**type** scalar  
**symbol**  $n$   
**definition**  $n \in \mathbb{N}$

**Functions****PMF**

$$1/(n+1)$$

2205 **PMF in R**

$$1/(n+1)$$

**CDF**

$$\frac{k+1}{n+1}$$

**CDF in R**

$$(k+1)/(n+1)$$

**Characteristics****Mean**

$$\frac{n}{2}$$

**Variance**

$$\frac{n(n+2)}{12}$$

2210 **Relationships**

- Relationship pair: *UniformDiscrete1(a, b) → UniformDiscrete2(n)*
- Relationship type: Special case
- Relationship definition:  $a = 0, b = n$
- Relationship pair: *BetaBinomial1(n,  $\alpha, \beta$ ) → UniformDiscrete2(n)*
- 2215 - Relationship type: Special case
- Relationship definition:  $\alpha = 1, \beta = 1$

**References**

[Leemis and Mcqueston, 2008], [Forbes et al., 2011]

<http://www.math.wm.edu/~leemis/chart/UDR/PDFs/Rectangular.pdf>

2220 <http://www.math.wm.edu/~leemis/chart/UDR/PDFs/DiscreteuniformRectangular.pdf>

<http://www.math.wm.edu/~leemis/chart/UDR/PDFs/BetabinomialRectangular.pdf>

**Weibull1**

**name** Weibull 1 (ID: 0000800)  
**type** continuous  
**variate**  $x$ , scalar  
**support**  $x \in [0, +\infty)$

**Parameter: scale**

**name** scale  
**type** scalar  
 2225 **symbol**  $\lambda$   
**definition**  $\lambda \in (0, +\infty)$

**Parameter: shape**

**name** shape  
**type** scalar  
**symbol**  $k$   
**definition**  $k \in (0, +\infty)$

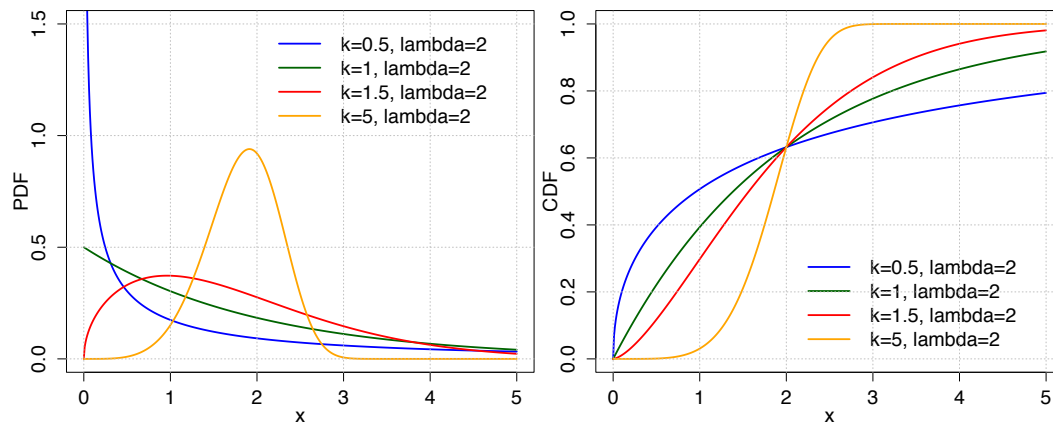

Figure 1.70: Weibull1 distribution plotted using the provided R code.

## Functions

### PDF

$$\frac{k}{\lambda} \left(\frac{x}{\lambda}\right)^{k-1} e^{-(x/\lambda)^k}$$

### PDF in R

2230 `k/lambda * (x/lambda)^(k-1) * exp(-(x/lambda)^k)`

### CDF

$$1 - \exp(-(x/\lambda)^k)$$

### CDF in R

`1- exp(-(x/lambda)^k)`

## Characteristics

### Mean

$$\lambda \Gamma(1 + 1/k)$$

### Median

$$\lambda(\log(2))^{1/k}$$

### Mode

$$\begin{cases} \lambda \left(\frac{k-1}{k}\right)^{\frac{1}{k}} & k > 1 \\ 0 & k = 1 \end{cases}$$

### Variance

$$\lambda^2 \left[ \Gamma\left(1 + \frac{2}{k}\right) - \left(\Gamma\left(1 + \frac{1}{k}\right)\right)^2 \right]$$

## Relationships

- 2235 - Relationship pair:  $Weibull1(\lambda, k) \rightarrow Weibull2(\lambda, v)$   
 - Relationship type: Reparameterisation  
 - Relationship definition:  $k = v, \lambda = 1/\lambda^k$   
 - Relationship pair:  $Weibull1(\lambda, k) \rightarrow Exponential1(\lambda_{Exponential})$   
 - Relationship type:  
 2240 - Relationship definition:  $k = 1, \lambda_{Exponential} = 1/\lambda$   
 - Relationship pair:  $Weibull1(\lambda, k) \rightarrow Rayleigh1(\sigma)$   
 - Relationship type:  
 - Relationship definition:  $k = 2, \lambda = \sqrt{2}\sigma$   
 - Relationship pair:  $GeneralizedGamma2(a, b, c, k) \rightarrow Weibull1(\lambda, k)$



- 2245 - Relationship type: Special case & Reparameterisation  
 - Relationship definition:  $c = 1, a = 0, b = \lambda$   
 - Relationship pair:  $Weibull2(\lambda, v) \rightarrow Weibull1(\lambda, k)$   
 - Relationship type: Reparameterisation  
 - Relationship definition:  $v = k, \lambda = \lambda^{-1/v}$

2250 **References**

[Forbes et al., 2011]  
[http://en.wikipedia.org/wiki/Weibull\\_distribution](http://en.wikipedia.org/wiki/Weibull_distribution)  
<http://www.uncertml.org/distributions/weibull>

**Weibull2**

2255 **name** Weibull 2 (ID: 0000022)  
**type** continuous  
**variate**  $x$ , scalar  
**support**  $x > 0$

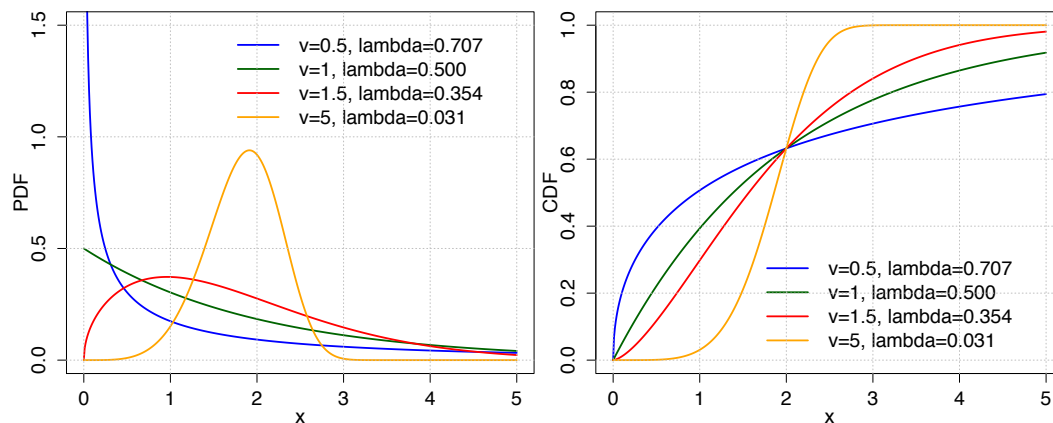

Figure 1.71: Weibull2 distribution plotted using the provided R code.

**Parameter: lambda**

**name** lambda  
**type** scalar  
**symbol**  $\lambda$   
**definition** –

**Parameter: shape**

**name** shape  
**type** scalar  
**symbol**  $v$   
**definition** –

2260 **Functions****PDF**

$$v\lambda x^{v-1}e^{-\lambda x^v}$$

**PDF in R**

```
v*lambda * x^(v-1) * exp(-lambda * x^v)
```

**CDF**

$$1 - \exp(-x^v \lambda)$$

**CDF in R**

1- exp(-x^v \* lambda)

2265 **Relationships**

- Relationship pair:  $Weibull2(\lambda, v) \rightarrow Weibull1(\lambda, k)$
- Relationship type: Reparameterisation
- Relationship definition:  $v = k, \lambda = \lambda^{-1/v}$
- Relationship pair:  $Weibull1(\lambda, k) \rightarrow Weibull2(\lambda, v)$
- 2270 - Relationship type: Reparameterisation
- Relationship definition:  $k = v, \lambda = 1/\lambda^k$

**References**

[Spiegelhalter et al., 2003]

**Wishart1**

|                     |                                            |
|---------------------|--------------------------------------------|
| <b>name</b>         | Wishart 1 (ID: 0000082)                    |
| <b>type</b>         | continuous                                 |
| 2275 <b>variate</b> | $X$ , matrix                               |
| <b>support</b>      | $X(p \times p)$ – positive definite matrix |

**Parameter: scaleMatrix**

|                   |                                                |
|-------------------|------------------------------------------------|
| <b>name</b>       | scale matrix                                   |
| <b>type</b>       | matrix                                         |
| <b>symbol</b>     | $V$                                            |
| <b>definition</b> | $V > 0, p \times p$ – positive definite matrix |

**Parameter: degreesOfFreedom**

|                   |                    |
|-------------------|--------------------|
| <b>name</b>       | degrees of freedom |
| <b>type</b>       | scalar             |
| <b>symbol</b>     | $n$                |
| <b>definition</b> | $n > p - 1$        |

2280 **Functions****PDF**

$$\frac{|X|^{\frac{n-p-1}{2}} e^{-\frac{\text{tr}(V^{-1}X)}{2}}}{2^{\frac{np}{2}} |V|^{\frac{n}{2}} \Gamma_p\left(\frac{n}{2}\right)}$$

**Characteristics****Mean**

$$nV$$

**Mode**

$$(n - p - 1)V \text{ for } n \leq p + 1$$

**Variance**

$$\text{Var}(X_{ij}) = n(v_{ij}^2 + v_{ii}v_{jj})$$

**References**

2285 [http://en.wikipedia.org/wiki/Wishart\\_distribution](http://en.wikipedia.org/wiki/Wishart_distribution)  
<http://www.uncertml.org/distributions/wishart>

**Wishart2**

**name** Wishart 2 (ID: 0000112)  
**type** continuous  
**variate**  $X$ , matrix  
**support**  $X(p \times p)$  – symmetric, positive definite matrix

**Parameter: inverseScaleMatrix**

**name** inverse scale matrix  
**type** matrix  
**symbol**  $R$   
**definition**  $p \times p$  – symmetric, positive definite matrix

2290 **Parameter: degreesOfFreedom**

**name** degrees of freedom  
**type** scalar  
**symbol**  $k$   
**definition** –

**Functions****PDF**

$$|R|^{k/2} |x|^{(k-p-1)/2} e^{-\frac{1}{2} \text{tr}(Rx)}$$

**References**

2295 [Spiegelhalter et al., 2003]

**ZeroInflatedGeneralizedPoisson1**

**name** Zero-Inflated Generalized Poisson 1 (ID: 0000169)  
**type** discrete  
**variate**  $y$ , scalar  
**support**  $y \in \{0, 1, 2, 3, \dots\}$

**Parameter: mean**

**name** mean  
**type** scalar  
**symbol**  $\mu$   
**definition**  $\mu > 0$

2300 **Parameter: dispersion**

**name** dispersion  
**type** scalar  
**symbol**  $\alpha$   
**definition**  $\alpha > -1, \alpha \in R$

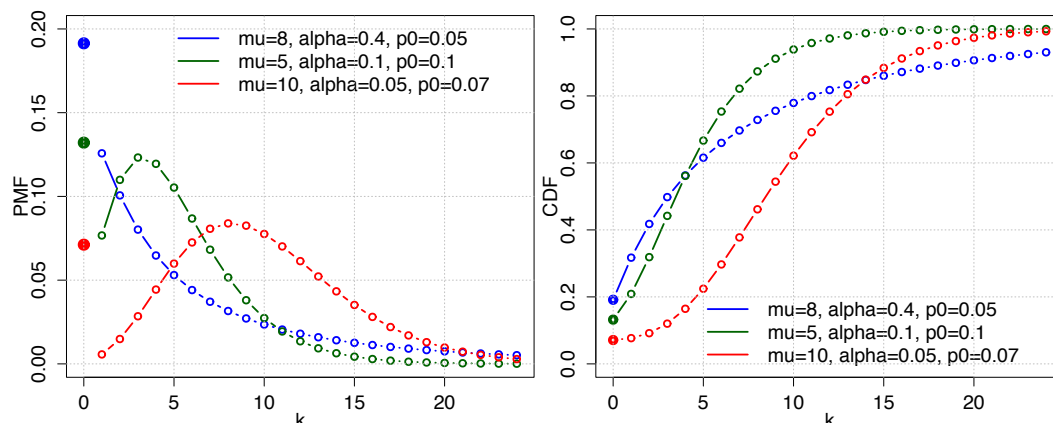

Figure 1.72: ZeroInflatedGeneralizedPoisson1 distribution plotted using the provided R code.

**Parameter: probabilityOfZero**

|                   |                          |
|-------------------|--------------------------|
| <b>name</b>       | probability of zero      |
| <b>type</b>       | scalar                   |
| <b>symbol</b>     | $p_0$                    |
| <b>definition</b> | $0 < p_0 < 1, p_0 \in R$ |

**Functions**

**PMF**

$$\begin{cases} p_0 + (1 - p_0) \exp\left[\frac{-\mu}{1+\alpha\mu}\right] & \text{for } y = 0 \\ (1 - p_0) \left(\frac{\mu}{1+\alpha\mu}\right)^y \frac{(1+\alpha y)^{y-1}}{y!} \exp\left[\frac{-\mu(1+\alpha y)}{1+\alpha\mu}\right] & \text{for } y > 0 \end{cases}$$

**PMF in R**

```
PMF1=p0 + (1-p0) * exp(-mu/(1+ alpha*mu)) # for y = 0
PMF2=(1-p0)*( mu/(1+alpha*mu))^y*((1+alpha*y)^(y-1))/factorial(y)*
exp((-mu*(1+alpha*y))/(1+alpha*mu)) # for y > 0
```

**CDF**

$$\sum_{i=1}^x f(i), x \in \{0, 1, 2, \dots\} \text{ with } f \text{ the PMF}$$

**CDF in R**

```
c(PMF1, cumsum(PMF2)+PMF1)
```

**Characteristics**

**Mean**

$$(1 - p_0)\mu$$

**Variance**

$$(1 - p_0)[\mu^2 + \mu(1 + \alpha\mu)^2] - (1 - p_0)^2\mu^2$$

**Relationships**

- Relationship pair:  $ZeroInflatedGeneralizedPoisson1(\mu, \alpha, p_0) \rightarrow GeneralizedPoisson3(\mu, \alpha)$

- Relationship type: Special case

2315 - Relationship definition:  $p_0 = 0$

- Relationship pair:  $ZeroInflatedGeneralizedPoisson1(\mu, \alpha, p_0) \rightarrow Poisson1(\lambda)$

- Relationship type: Special case & Reparameterisation

- Relationship definition:  $p_0 = 0, \alpha = 0, \lambda = \mu$

- Relationship pair:  $ZeroInflatedGeneralizedPoisson1(\mu, \alpha, p_0) \rightarrow ZeroInflatedPoisson1(\lambda, \pi)$

2320 - Relationship type: Special case & Reparameterisation

- Relationship definition:  $\alpha = 0, \lambda = \mu$

References

[Famoye and Singh, 2006], [Trocóniz et al., 2009]

# ZeroInflatedNegativeBinomial1

2325

**name** Zero-Inflated Negative Binomial 1 (ID: 0000142)  
**type** discrete  
**variate**  $k$ , scalar  
**support**  $k \in \{0, 1, 2, 3, \dots\}$

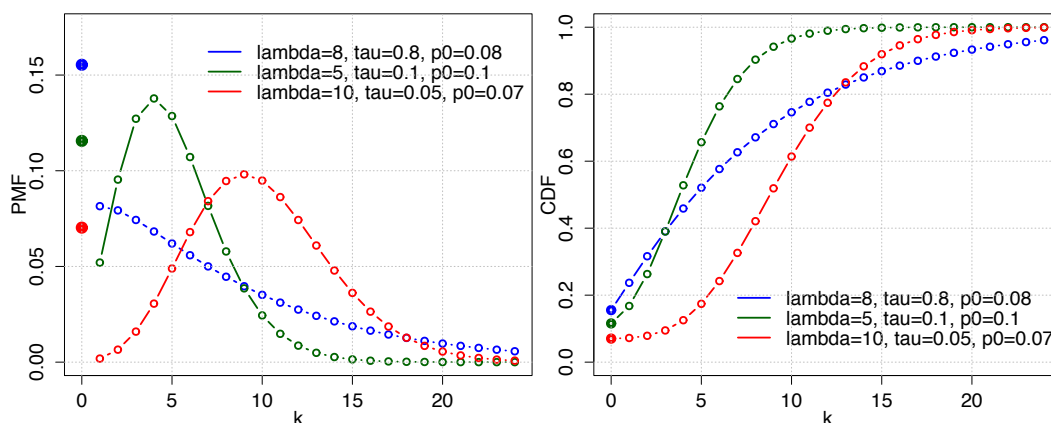

Figure 1.73: ZeroInflatedNegativeBinomial1 distribution plotted using the provided R code.

**Parameter: rate**

**name** mean  
**type** scalar  
**symbol**  $\lambda$   
**definition**  $\lambda > 0$

**Parameter: overdispersion**

**name** overdispersion  
**type** scalar  
**symbol**  $\tau$   
**definition** –

2330

**Parameter: probabilityOfZero**

**name** probability of zero  
**type** scalar  
**symbol**  $p_0$   
**definition**  $0 < p_0 < 1, p_0 \in R$

**Functions**

**PMF**

$$\begin{cases} p_0 + (1 - p_0) \left(\frac{1}{1 + \tau\lambda}\right)^{1/\tau} & \text{for } y = 0 \\ (1 - p_0) \frac{\Gamma(y + 1/\tau)}{y! \Gamma(1/\tau)} \left(\frac{1}{1 + \tau\lambda}\right)^{1/\tau} \left(\frac{\lambda}{1/\tau + \lambda}\right)^y & \text{for } y > 0 \end{cases}$$

**PMF in R**

PMF1=p0 + (1-p0) \* (1/ (1 + tau \* lambda))^(1/tau) # for y=0

2335

PMF2=(1-p0) \* gamma(y+1/tau) / (factorial(y) \* gamma(1/tau)) \* (1/(1 + tau\*lambda))^(1/tau) \* (lambda/(1/tau + lambda))^y # for y>0

**CDF**

$$\sum_{i=1}^x f(i), x \in \{0, 1, 2, \dots\}$$

with  $f$  the PMF

**CDF in R**

`c(PMF1, cumsum(PMF2)+PMF1)`

**Characteristics**

**Mean**

$$\mu$$

2340 **Relationships**

- Relationship pair: *ZeroInflatedNegativeBinomial1*( $\lambda, \tau, p0$ )  $\rightarrow$  *NegativeBinomial2*( $\lambda, \tau$ )
- Relationship type: Special case
- Relationship definition:  $p0 = 0$
- Relationship pair: *ZeroInflatedNegativeBinomial1*( $\lambda, \tau, p0$ )  $\rightarrow$  *ZeroInflatedPoisson1*( $\lambda, \pi$ )
- 2345 - Relationship type: Limiting
- Relationship definition:  $\tau \rightarrow 0$
- Relationship pair: *ZeroInflatedNegativeBinomial1*( $\lambda, \tau, p0$ )  $\rightarrow$  *Poisson1*( $\lambda$ )
- Relationship type: Limiting
- Relationship definition:  $p0 = 0, \tau \rightarrow 0$

2350 **References**

[Famoye and Singh, 2006], [Trocóniz et al., 2009]

## ZeroInflatedPoisson1

**name** Zero-inflated Poisson 1 (ID: 0000197)  
**type** discrete  
**variate**  $k$ , scalar  
**support**  $k \in \{0, 1, 2, 3, \dots\}$

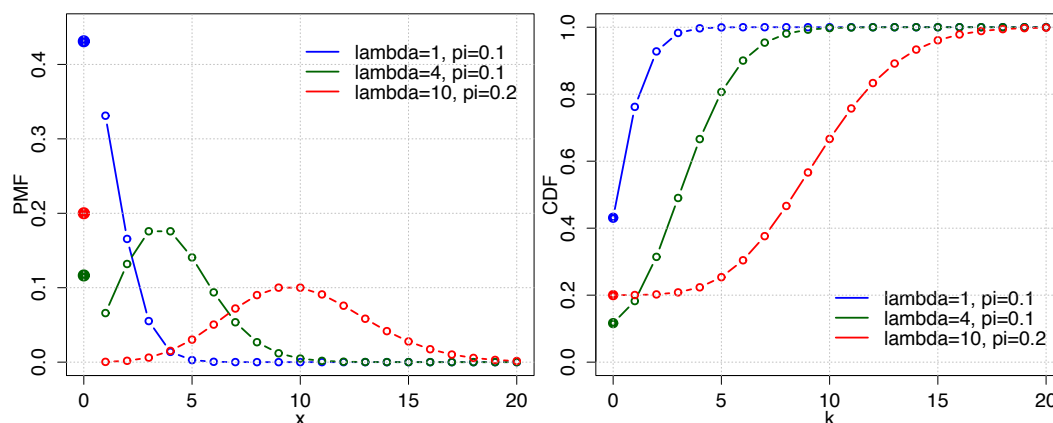

Figure 1.74: ZeroInflatedPoisson1 distribution plotted using the provided R code.

**Parameter: rate**

**name** Poisson intensity  
**type** scalar  
 2355 **symbol**  $\lambda$   
**definition**  $\lambda \in R, \lambda > 0$

**Parameter: probabilityOfZero**

|                   |                            |
|-------------------|----------------------------|
| <b>name</b>       | probability of extra zeros |
| <b>type</b>       | scalar                     |
| <b>symbol</b>     | $\pi$                      |
| <b>definition</b> | $0 < \pi < 1, \pi \in R$   |

**Functions****PMF**

$$\begin{cases} \pi + (1 - \pi)e^{-\lambda} & \text{for } k = 0 \\ (1 - \pi)e^{-\lambda} \frac{\lambda^k}{k!} & \text{for } k > 0 \end{cases}$$

**PMF in R**

2360 PMF1=pi + (1-pi)\*exp(-lambda) # if k=0  
 PMF2=(1-pi)\*exp(-lambda) \* lambda^k/factorial(k) # if k>0

**CDF**

$$\sum_{i=1}^x f(i), x \in \{0, 1, 2, \dots\} \text{ with } f \text{ the PMF}$$

**CDF in R**

c(PMF1, cumsum(PMF2)+PMF1)

**Characteristics****Mean**

$$(1 - \pi)\lambda$$

**Variance**

$$\lambda(1 - \pi)(1 + \lambda\pi)$$

2365 **Relationships**

- Relationship pair: *ZeroInflatedPoisson1*( $\lambda, \pi$ )  $\rightarrow$  *Poisson1*( $\lambda$ )
- Relationship type: Special case
- Relationship definition:  $\pi = 0$
- Relationship pair: *ZeroInflatedNegativeBinomial1*( $\lambda, \tau, p0$ )  $\rightarrow$  *ZeroInflatedPoisson1*( $\lambda, \pi$ )
- 2370 - Relationship type: Limiting
- Relationship definition:  $\tau \rightarrow 0$
- Relationship pair: *ZeroInflatedGeneralizedPoisson1*( $\mu, \alpha, p0$ )  $\rightarrow$  *ZeroInflatedPoisson1*( $\lambda, \pi$ )
- Relationship type: Special case & Reparameterisation
- Relationship definition:  $\alpha = 0, \lambda = \mu$

2375 **References**

[Famoye and Singh, 2006], [Trocóniz et al., 2009], [Plan, 2014]  
[http://en.wikipedia.org/wiki/Zero-inflated\\_model#Zero-inflated\\_Poisson](http://en.wikipedia.org/wiki/Zero-inflated_model#Zero-inflated_Poisson)

# Bibliography

- 2380 [Cameron and Trivedi, 2013] Cameron, A. C. and Trivedi, P. K. (2013). *Regression analysis of count data*, volume 53. Cambridge university press.
- [Consul and Famoye, 2006] Consul, P. C. and Famoye, F. (2006). *Lagrangian probability distributions*. Birkhäuser, Boston.
- [Famoye and Singh, 2006] Famoye, F. and Singh, K. P. (2006). Zero-inflated generalized poisson regression model with an application to domestic violence data. *Journal of Data Science*, 4(1):117–130.
- 2385 [Forbes et al., 2011] Forbes, C., Evans, M., Hastings, N., and Peacock, B. (2011). *Statistical distributions*. John Wiley & Sons.
- [Gelman et al., 2014] Gelman, A., Carlin, J. B., Stern, H. S., Dunson, D. B., Vehtari, A., and Rubin, D. B. (2014). Bayesian data analysis.
- [Hilbe, 2011] Hilbe, J. M. (2011). *Negative binomial regression*. Cambridge University Press.
- 2390 [Ismail and Zamani, 2013] Ismail, N. and Zamani, H. (2013). Estimation of claim count data using negative binomial, generalized poisson, zero-inflated negative binomial and zero-inflated generalized poisson regression models. In *Casualty Actuarial Society E-Forum, Spring 2013*.
- [Leemis and Mcqueston, 2008] Leemis, L. M. and Mcqueston, J. T. (2008). Univariate distribution relationships. *The American Statistician*, 62(1):45–53.
- 2395 [Limpert et al., 2001] Limpert, E., Stahel, W. A., and Abbt, M. (2001). Log-normal distributions across the sciences: Keys and clues. *BioScience*, 51(5):341–352.
- [Lunn, 2012] Lunn, D. (2012). *The BUGS book: a practical introduction to Bayesian analysis*. Texts in statistical science. CRC Press.
- [Marichev and Trott, 2013] Marichev, O. and Trott, M. (2013). The Ultimate Univariate Probability Distribution Explorer.
- 2400 [MathWorks, 2015] MathWorks (2015). *MATLAB and Statistics Toolbox*. The MathWorks Inc., Natick, Massachusetts.
- [Plan, 2014] Plan, E. L. (2014). Modeling and simulation of count data. *CPT Pharmacometrics Syst Pharmacol*, 3:e129.
- 2405 [Plummer, 2003] Plummer, M. (2003). JAGS: A Program for Analysis of Bayesian Graphical Models Using Gibbs Sampling.
- [Shmueli et al., 2005] Shmueli, G., Minka, T. P., Kadane, J. B., Borle, S., and Boatwright, P. (2005). A useful distribution for fitting discrete data: revival of the conway–maxwell–poisson distribution. *Journal of the Royal Statistical Society: Series C (Applied Statistics)*, 54(1):127–142.
- 2410 [Spiegelhalter et al., 2003] Spiegelhalter, D., Thomas, A., Best, N., and Lunn, D. (2003). WinBUGS User Manual, Version 1.4.
- [Stacy, 1962] Stacy, E. W. (1962). A generalization of the gamma distribution. *The Annals of Mathematical Statistics*, pages 1187–1192.
- 2415 [STAN Development Team, 2015] STAN Development Team (2015). Stan Modeling Language Users Guide and Reference Manual, Version 2.9.0.



- [Trocóniz et al., 2009] Trocóniz, I. F., Plan, E. L., Miller, R., and Karlsson, M. O. (2009). Modelling overdispersion and markovian features in count data. *J Pharmacokinet Pharmacodyn*, 36(5):461–77.
- [Yanagimoto, 1989] Yanagimoto, T. (1989). The inverse binomial distribution as a statistical model. *Communications in Statistics-Theory and Methods*, 18(10):3625–3633.
- <sup>2420</sup> [Yang et al., 2007] Yang, Z., Hardin, J. W., Addy, C. L., and Vuong, Q. H. (2007). Testing approaches for overdispersion in poisson regression versus the generalized poisson model. *Biom J*, 49(4):565–84.
